# Supplementary material for: Time-series analysis of meteorological factors and emergency department visits due to dog/cat bites in Jinshan area, China
Source: PeerJ journal article supplement (doi:10.7717/peerj.16758), 2024-01-18

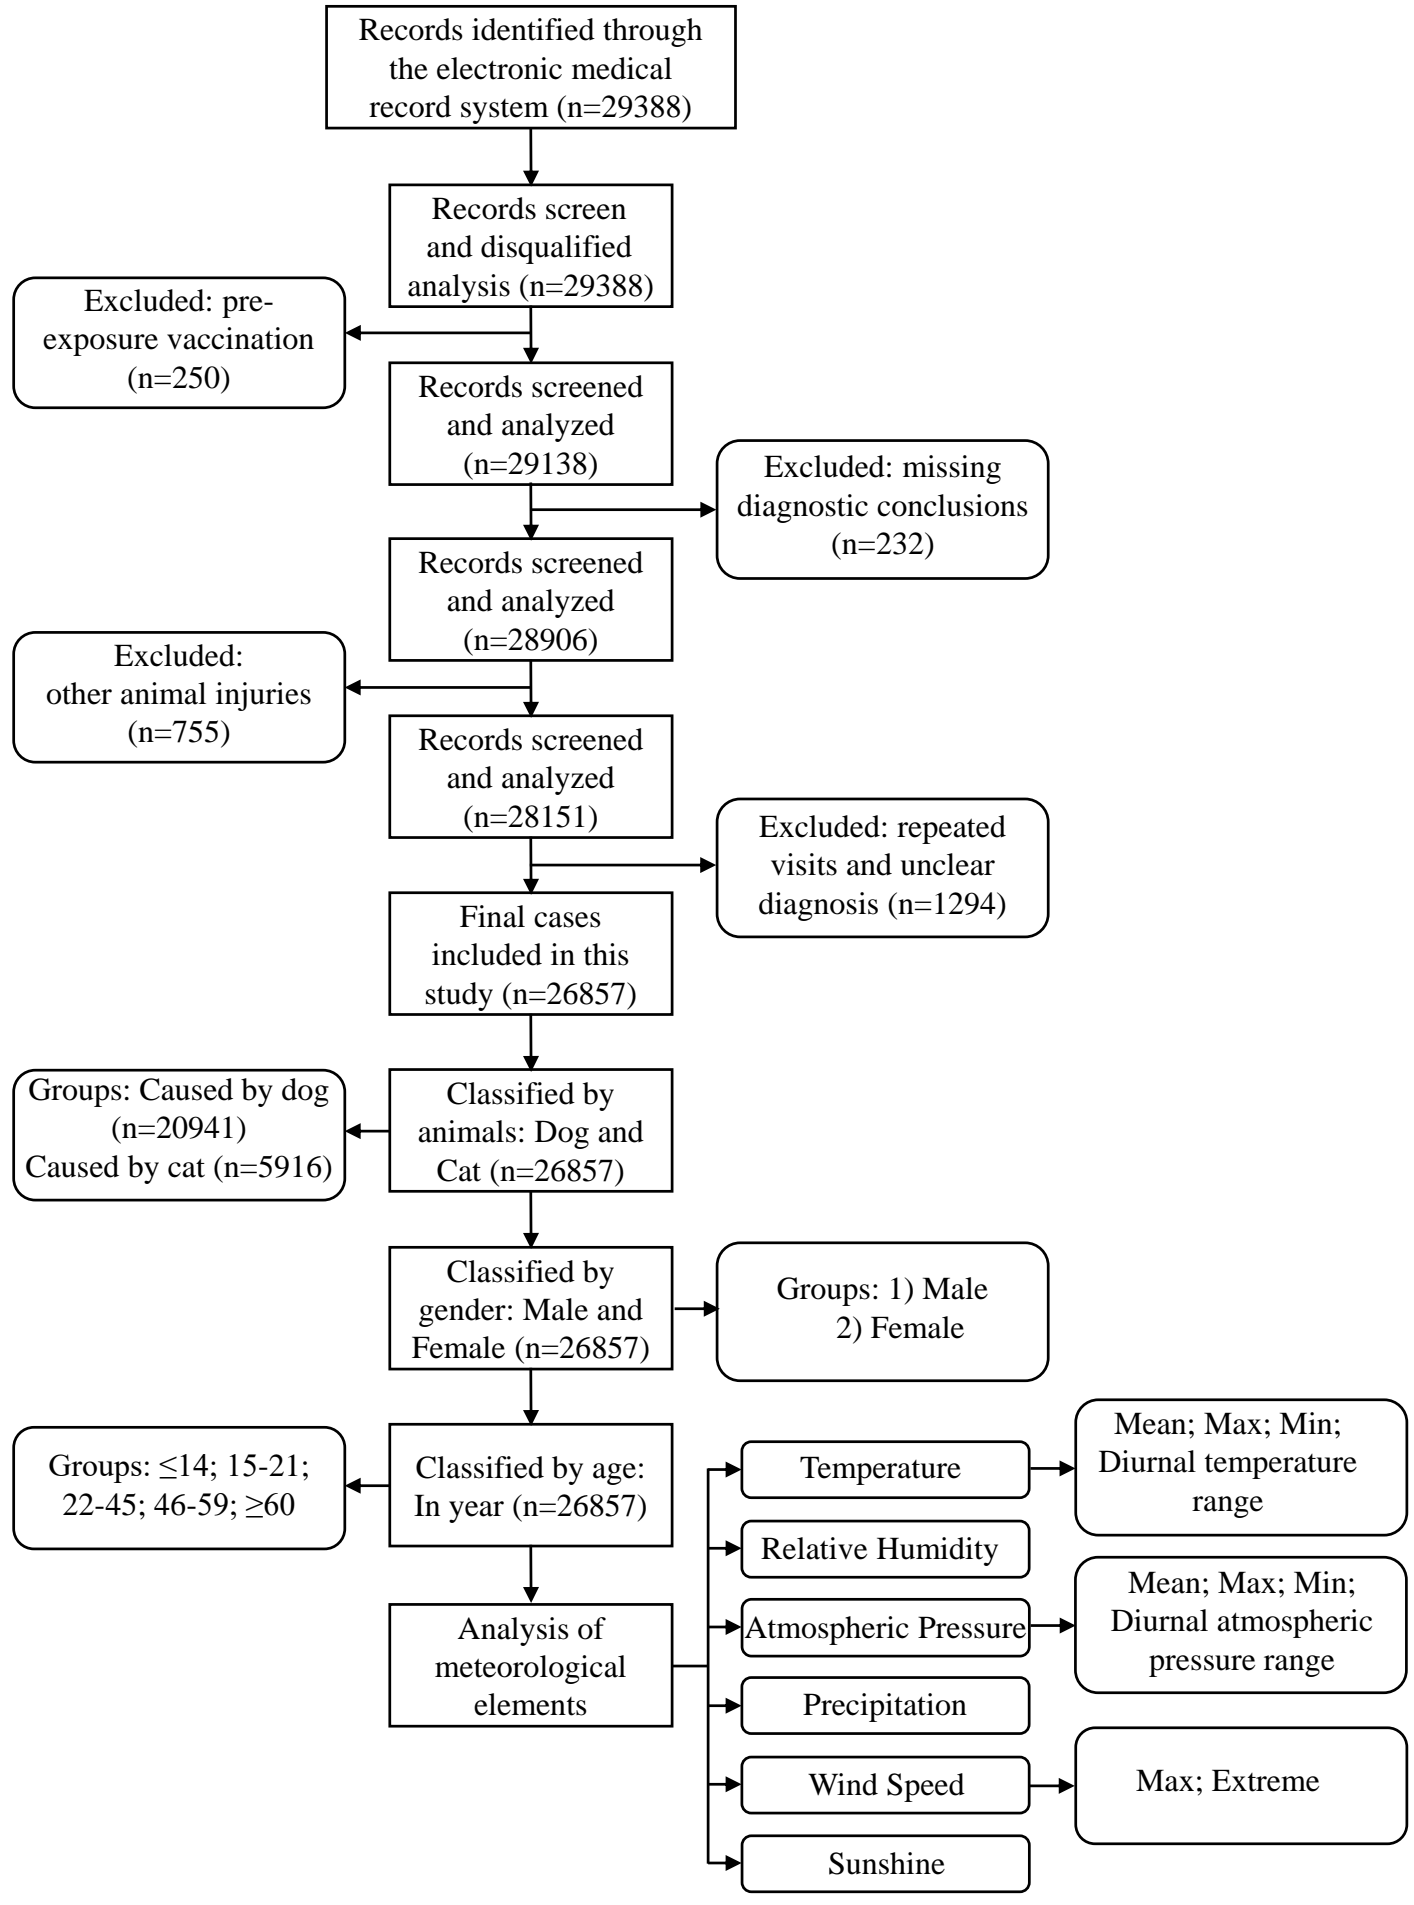

Supplement: Figure_S1.pdf [file Figure_S1.pdf]
