# Supplementary material for: Time-series analysis of meteorological factors and emergency department visits due to dog/cat bites in Jinshan area, China
Source: PeerJ. 2024 Jan 18;12:e16758. doi: 10.7717/peerj.16758 (PMC10800098; doi:10.7717/peerj.16758)
Supplement: Supplemental Information 1 [file peerj-12-16758-s001.xlsx]

## Sheet: raw data
serial number	Date of hospital visiting	Tmean(℃)	Tmax (℃)	Tmin (℃)	DTR (℃)	Apmean (hPa)	Apmax (℃)	Apmin (℃)	DAPR (hPa)	RH(%)	Wsmax (m/s)	WSextreme(m/s)	Precipitation (mm)	Sunshine(hour)	Daily number
1	2016-01-01	5.7	10.1	-0.1	10.2	1031	1035.5	1027.6	7.9	85	3.2	5.6	0	8.4	15
2	2016-01-02	11.2	18.3	7	11.3	1022.9	1027.7	1020.5	7.2	73	3.2	5.4	0	6.7	11
3	2016-01-03	11.4	18.3	7.1	11.2	1020.4	1022.2	1018.8	3.4	84	2.1	3.7	0.3	4.2	11
4	2016-01-04	11.9	13.5	10.5	3	1020.1	1022	1018.6	3.4	92	3.6	6.7	2.4	0	9
5	2016-01-05	9.9	12.8	8.8	4	1021.4	1024.2	1016.4	7.8	92	6.3	14	11.3	0	7
6	2016-01-06	8.6	9.8	7.1	2.7	1025.7	1028	1023.1	4.9	82	4.2	8.3	5.8	0	10
7	2016-01-07	6.8	9.6	3.6	6	1028	1030	1026.5	3.5	80	2.7	4.9	0	0	11
8	2016-01-08	5.2	8.7	2.8	5.9	1027.2	1029.1	1025.8	3.3	60	3.9	7.7	0.1	4.5	10
9	2016-01-09	5	9.5	0	9.5	1026.8	1029	1024.6	4.4	66	3.2	5.4	0	5.3	7
10	2016-01-10	8.9	10.3	6.5	3.8	1024.1	1026.2	1021.8	4.4	84	4.4	6.4	1.4	0	7
11	2016-01-11	7.6	9.2	6.7	2.5	1023.6	1025.7	1021.8	3.9	90	5.6	8.8	7.5	0	1
12	2016-01-12	4.6	6.6	3.8	2.8	1028.2	1029.8	1025.5	4.3	76	4.1	8.3	0.5	0	4
13	2016-01-13	2	4.6	-0.4	5	1027.5	1029.8	1025.5	4.3	71	4.7	9.6	0	3.3	10
14	2016-01-14	2.8	7.1	-2.2	9.3	1024.9	1027.7	1021.6	6.1	76	2.9	4.7	0	6	9
15	2016-01-15	5.1	11.1	2	9.1	1020.8	1023.5	1019.1	4.4	68	3.4	5.8	0	4.6	10
16	2016-01-16	5.5	11	0.7	10.3	1019.7	1022	1017.4	4.6	80	5.2	8.1	0	4.2	2
17	2016-01-17	7.5	8.8	6.4	2.4	1015.6	1018.2	1012.5	5.7	88	5.1	8.5	12	0	6
18	2016-01-18	3.8	6.4	1.8	4.6	1023	1027.5	1018.2	9.3	74	4.9	8.8	0	0	12
19	2016-01-19	0.7	4.8	-1.6	6.4	1030.2	1032	1027.5	4.5	57	3.7	9.2	0	7.1	6
20	2016-01-20	2.2	6.4	-2.3	8.7	1031.1	1033.4	1028.4	5	64	4.6	7.4	0	6.6	5
21	2016-01-21	2.4	3.4	1.1	2.3	1027.8	1030.2	1026.2	4	94	3.8	7.8	10	0	9
22	2016-01-22	3.3	4.8	2.6	2.2	1029.2	1031.5	1026.8	4.7	86	5.4	10.9	5.2	0	5
23	2016-01-23	-0.8	2.8	-3.5	6.3	1036.9	1039.5	1031.5	8	64	7	14.4	1.3	5.8	7
24	2016-01-24	-5.2	-3.5	-6.5	3	1039.7	1041.9	1037.3	4.6	40	9.1	18.5	0	8.7	4
25	2016-01-25	-2.9	2.5	-7.2	9.7	1037.3	1041.2	1034.1	7.1	45	5.4	9.3	0	9.1	5
26	2016-01-26	1.2	6	-4.4	10.4	1032	1034.9	1029.8	5.1	62	3.6	5.7	0	8.2	11
27	2016-01-27	4.5	5.2	2.9	2.3	1028.2	1030.8	1026.5	4.3	86	2.7	4.3	6.1	0	7
28	2016-01-28	6.1	7.2	4.5	2.7	1021.4	1027.4	1018.5	8.9	99	3.5	6.4	6.6	0	2
29	2016-01-29	6.2	7.5	4.8	2.7	1022.8	1026.5	1019.2	7.3	96	3.8	7.3	6.9	0	3
30	2016-01-30	4.6	7.2	3.3	3.9	1028.1	1030.3	1025.4	4.9	82	3.3	6	0.6	0	4
31	2016-01-31	2.8	7.8	0.5	7.3	1031.8	1033.7	1028.8	4.9	82	4.9	8.8	4.4	3.7	9
32	2016-02-01	0.8	2.6	-0.2	2.8	1033.9	1035.2	1032.1	3.1	74	5.1	9.7	5	1.6	6
33	2016-02-02	1.3	5.5	-2	7.5	1032.2	1034.7	1029.3	5.4	62	4	7.7	0	7.7	9
34	2016-02-03	1.7	7.6	-2.5	10.1	1030.1	1032.3	1028.5	3.8	76	2.9	5.6	0	4.3	10
35	2016-02-04	2.6	6.1	-1.8	7.9	1028.2	1030.3	1025.9	4.4	85	3.2	4.7	0	0	11
36	2016-02-05	4.8	9.7	0.2	9.5	1027.4	1028.7	1025.1	3.6	65	3.3	5.8	0	6.5	6
37	2016-02-06	3.9	7.4	1	6.4	1029.3	1031.3	1026.9	4.4	56	5.4	11.3	0	7.8	10
38	2016-02-07	4	8.9	-2.3	11.2	1025.6	1031	1021.9	9.1	52	4.2	6.8	0	8.5	12
39	2016-02-08	7.4	14.7	-0.5	15.2	1022.1	1024.4	1019.7	4.7	52	4.9	7.1	0	9	9
40	2016-02-09	10.2	18.6	2.7	15.9	1021.3	1023.3	1020.2	3.1	56	3.6	5.9	0	9.2	8
41	2016-02-10	11.5	17	6.8	10.2	1018.5	1021.3	1016.5	4.8	68	5.1	10.2	0	9.5	6
42	2016-02-11	12.5	15.9	10.5	5.4	1014.5	1018.1	1012.3	5.8	94	4.9	11.1	0.5	3.9	7
43	2016-02-12	12	14.7	10.4	4.3	1011.7	1014.4	1009	5.4	95	4	8.2	0.1	3.3	11
44	2016-02-13	12.6	15.9	9.3	6.6	1010.4	1017.3	1004.9	12.4	88	7.8	15.6	1.4	0	3
45	2016-02-14	3.8	9.3	1.7	7.6	1025.9	1029.2	1017.4	11.8	63	6	12.2	0	0	19
46	2016-02-15	2.5	5.8	-0.6	6.4	1030	1032.2	1027.7	4.5	44	6	11.6	0	9.1	9
47	2016-02-16	5.2	10.3	0	10.3	1027.5	1029.9	1024.2	5.7	44	6	10.4	0	9.4	7
48	2016-02-17	6.2	11	1.3	9.7	1027.8	1029.4	1025.9	3.5	50	3.5	5.7	0	7.6	9
49	2016-02-18	8.7	13.9	5.7	8.2	1024.3	1027.5	1021.6	5.9	62	3.5	6.5	0	9.7	11
50	2016-02-19	8.6	10.9	5.1	5.8	1024.1	1026.1	1021	5.1	84	4.7	7.6	0	0	6
51	2016-02-20	8.1	12.4	5.9	6.5	1027.4	1029.5	1024.5	5	52	5.2	11.7	0	8.6	8
52	2016-02-21	7	9.7	2.8	6.9	1029.2	1031.4	1027.7	3.7	68	4.5	7.2	0	3.3	15
53	2016-02-22	6.9	8.1	5.5	2.6	1027.2	1030	1024.8	5.2	91	4.8	7.4	15.9	0	6
54	2016-02-23	7.1	9.1	5.5	3.6	1031.2	1033.8	1027.6	6.2	81	3.9	7	0	0.7	5
55	2016-02-24	6	10.5	3.3	7.2	1036.4	1038.4	1033.8	4.6	66	4.4	6.7	0	9.1	8
56	2016-02-25	5.5	8.5	-0.3	8.8	1036.1	1038.6	1033.7	4.9	70	4.2	6.7	0	9.4	9
57	2016-02-26	9.2	12.6	6.7	5.9	1029.4	1034.3	1026	8.3	71	3.8	7.3	0	5.9	6
58	2016-02-27	12	17.2	7.3	9.9	1024.4	1026.7	1022.7	4	66	3.7	6.2	0	9.6	18
59	2016-02-28	13.2	21.8	9	12.8	1023.3	1027.4	1020.6	6.8	57	6.2	10.5	0	8.8	13
60	2016-02-29	7.2	12	3.6	8.4	1032.2	1034	1027.4	6.6	58	5.3	9.4	0	8.9	6
61	2016-03-01	5.2	8.8	-0.1	8.9	1029.7	1033	1027.2	5.8	69	4.5	7.7	0	9.4	6
62	2016-03-02	9.8	13.5	6.9	6.6	1024	1028	1021.3	6.7	74	4.2	7.6	0	9	2
63	2016-03-03	13.7	21.5	8.5	13	1019.2	1022.4	1017.2	5.2	71	3.2	5.8	0	9.5	4
64	2016-03-04	16.2	20	12.4	7.6	1017.4	1018.9	1016.1	2.8	75	4.8	9.6	0	8.2	5
65	2016-03-05	16.4	23.3	13	10.3	1016.5	1018.4	1014.2	4.2	83	4.3	9.6	0	7.6	8
66	2016-03-06	11.8	15	10.3	4.7	1018.5	1020.2	1016.7	3.5	89	4.2	6.8	0	0	8
67	2016-03-07	10.6	13.4	9.3	4.1	1016.1	1018.6	1013.7	4.9	97	4.6	7.2	0	0	16
68	2016-03-08	10	12.3	6.6	5.7	1014.5	1016.5	1011.6	4.9	97	8.9	17.7	20.7	0	9
69	2016-03-09	6.2	8	4.8	3.2	1024.4	1028.3	1015.8	12.5	72	6.4	12.8	13.6	0.3	8
70	2016-03-10	4.2	7.1	1.7	5.4	1030.2	1031.7	1028.3	3.4	62	4.7	9	0.4	0	10
71	2016-03-11	4.4	9.6	-1.6	11.2	1028.1	1031.5	1025.3	6.2	56	3.8	6.7	0	7.7	11
72	2016-03-12	8.3	11.1	5.6	5.5	1022.8	1026.4	1018.4	8	58	6.6	11.6	0	8.4	11
73	2016-03-13	9.1	10.3	7.7	2.6	1019.7	1021.8	1018.1	3.7	87	5.2	10.4	0.8	0	4
74	2016-03-14	7.6	12.9	4.9	8	1025	1026.7	1021.4	5.3	78	3.4	9.1	0	4.9	14
75	2016-03-15	7.7	11.1	2.1	9	1022.4	1025.3	1018.8	6.5	78	5.2	9.7	0	8	5
76	2016-03-16	11.5	15.6	8.9	6.7	1018.2	1019.8	1017	2.8	77	4.5	7	0	8.8	10
77	2016-03-17	12.1	15.7	9	6.7	1015.5	1019.2	1011.8	7.4	93	4.2	7.2	0	2.5	10
78	2016-03-18	15	19	12.2	6.8	1011.3	1013	1009.4	3.6	88	3.1	5.3	0.2	0	9
79	2016-03-19	13.3	17.5	11.6	5.9	1017.2	1020.3	1012.7	7.6	90	3.1	5.6	0	0.7	9
80	2016-03-20	10.4	15.2	6.6	8.6	1021.6	1023.3	1020.2	3.1	82	4.4	6.9	0	8.1	13
81	2016-03-21	10.3	13.6	7.6	6	1022.1	1023.6	1020.8	2.8	85	4.9	8.4	0	6.6	7
82	2016-03-22	11.1	12	10.5	1.5	1018.6	1021.9	1015.9	6	92	4.3	7	1.8	0	4
83	2016-03-23	11.1	13.5	9.6	3.9	1021.5	1025.8	1016.6	9.2	70	5	10.2	0.8	0	6
84	2016-03-24	8.2	11.5	5.3	6.2	1028.1	1029.5	1025.8	3.7	51	5.2	9.5	0	1.9	13
85	2016-03-25	9.3	14.9	5.4	9.5	1027.2	1030.3	1025.2	5.1	52	4.1	8.7	0	9.1	3
86	2016-03-26	9.3	13.6	2.7	10.9	1025.7	1027.9	1023.6	4.3	46	3.9	6.6	0	9.3	14
87	2016-03-27	11.8	16.9	6.7	10.2	1024.9	1026.4	1023.2	3.2	50	5	9.3	0	7.8	9
88	2016-03-28	12.8	18.2	6.6	11.6	1023.5	1025.9	1021	4.9	55	5.1	7.7	0	10.3	14
89	2016-03-29	16.2	22.3	11.3	11	1019.4	1021.5	1017.3	4.2	48	4.5	7.9	0	6.5	13
90	2016-03-30	15.8	19.1	13.5	5.6	1019.8	1021.9	1018.2	3.7	64	4.7	8	0.6	0.8	16
91	2016-03-31	12	14.3	11.1	3.2	1016.2	1019.5	1015.1	4.4	94	2.9	5.7	5.4	0	6
92	2016-04-01	12.1	14.8	9.1	5.7	1015.1	1017.2	1013.5	3.7	93	5.6	8.7	0	6.5	12
93	2016-04-02	14.3	17.4	12.8	4.6	1013.6	1015.2	1011.9	3.3	92	5	8	19.2	2.4	8
94	2016-04-03	14.8	16.4	13.1	3.3	1012.2	1014.3	1009.6	4.7	96	4.1	7.6	7.6	0	11
95	2016-04-04	12.6	16.9	10.5	6.4	1015.8	1018.2	1014.3	3.9	79	4.3	7.4	0	4.7	7
96	2016-04-05	13.2	15.8	12.2	3.6	1015.6	1017.3	1013.9	3.4	84	5	8.7	0	1	14
97	2016-04-06	14.5	16.7	12.8	3.9	1008.1	1016	1003.2	12.8	95	5.1	10	25.8	0	4
98	2016-04-07	14.9	18.8	12.5	6.3	1012.1	1015.6	1003.7	11.9	91	4.7	8.3	16.8	0	3
99	2016-04-08	15.2	19	12.7	6.3	1016.6	1018.4	1014.7	3.7	87	3	5	0.1	8.4	10
100	2016-04-09	15.3	19	13.1	5.9	1013.4	1016.8	1010.5	6.3	87	3.5	5.5	0	2.4	10
101	2016-04-10	14.2	18.2	12.6	5.6	1012.2	1014.1	1010.4	3.7	93	4.2	6.5	0	5.2	16
102	2016-04-11	13.6	17.8	11.6	6.2	1016.3	1018.9	1014.2	4.7	89	5.1	8.3	0	4.6	9
103	2016-04-12	14.8	16.9	13.1	3.8	1010.9	1017	1007.2	9.8	94	5.2	8.3	22.6	2	8
104	2016-04-13	16.5	23	14.4	8.6	1006.6	1008.3	1004.7	3.6	92	3.9	6.9	0	4.8	9
105	2016-04-14	14.6	19.6	13.1	6.5	1012.9	1015.5	1008.1	7.4	96	3.7	5.8	0.1	5.1	12
106	2016-04-15	16.2	19.7	13.6	6.1	1015.1	1017.4	1012.6	4.8	82	4.9	9	0	7.7	9
107	2016-04-16	17.8	23.1	15.7	7.4	1004.5	1013.4	997.4	16	86	9.8	19.3	6.4	0	9
108	2016-04-17	16.9	22.2	14.3	7.9	1015.2	1017.1	1007.9	9.2	72	6.9	13.2	0	8.5	19
109	2016-04-18	13.8	17	11.1	5.9	1019	1020.6	1015.5	5.1	66	4.9	8	0.4	9.9	10
110	2016-04-19	15.7	18.8	13.2	5.6	1020.6	1023.3	1018	5.3	74	7.2	11.7	0	11.9	12
111	2016-04-20	17.7	19.3	14.9	4.4	1012.7	1019.6	1008	11.6	93	7.1	12.2	4.2	0	16
112	2016-04-21	19.2	23	17.3	5.7	1009.2	1011.1	1005.7	5.4	88	4	7.8	14.3	3	6
113	2016-04-22	19.2	23.3	15.1	8.2	1010.6	1011.7	1008.9	2.8	80	4.2	6.4	0	8.5	13
114	2016-04-23	14.3	18.1	13.4	4.7	1010.3	1011.5	1008.6	2.9	95	9	14.3	31.9	0	4
115	2016-04-24	15.6	18.4	14	4.4	1013.4	1015.2	1011.4	3.8	88	7.5	10.9	6.6	0	11
116	2016-04-25	14.8	16.4	13.2	3.2	1015.3	1016.4	1013.9	2.5	85	4.6	7.1	4.2	0	6
117	2016-04-26	15.2	16.6	14	2.6	1011.1	1016.1	1008.2	7.9	94	4.8	8.3	25.9	0	6
118	2016-04-27	15.7	17.1	13.9	3.2	1008.4	1009.7	1006.7	3	86	6.4	12.2	0.1	1.3	12
119	2016-04-28	18.2	22.9	14.5	8.4	1013	1014.8	1009.7	5.1	70	5.3	9.9	0	7.9	6
120	2016-04-29	18.6	24.6	12.4	12.2	1015.8	1017.7	1014.5	3.2	64	4.2	6.5	0	9.9	7
121	2016-04-30	19.5	23.3	16.3	7	1012.5	1015.3	1009.8	5.5	66	4.6	8.1	0	11.6	15
122	2016-05-01	20.3	24	17.2	6.8	1010.1	1012.3	1007.9	4.4	75	4.9	11.5	0	10.4	13
123	2016-05-02	20.6	22.1	19.5	2.6	1005.9	1008.9	1002.1	6.8	88	4.3	9.2	6.1	0	14
124	2016-05-03	21.6	26	18.2	7.8	1007.5	1010.6	1000.5	10.1	59	8.5	16.3	9.1	10.7	4
125	2016-05-04	20.5	25.5	14.8	10.7	1011.9	1013.5	1010	3.5	75	3.9	7.2	0	11.7	8
126	2016-05-05	21.6	24.2	19.7	4.5	1008	1011.3	1005.3	6	91	4.4	8.1	2.5	0.7	13
127	2016-05-06	24	30.6	19.8	10.8	1007.5	1010.3	1004.6	5.7	84	4.9	7.7	4.1	7.8	11
128	2016-05-07	16.4	21.6	12.6	9	1014.6	1016.8	1010.2	6.6	81	7.2	10.5	5.9	0	4
129	2016-05-08	15.1	16.2	13	3.2	1014	1017.3	1011.6	5.7	92	4.8	8.4	10	0	10
130	2016-05-09	16.7	18.6	14.9	3.7	1010.6	1013.6	1007.5	6.1	96	3.1	5.3	3.1	0	12
131	2016-05-10	16.4	19.9	13.2	6.7	1009.1	1011.6	1005.9	5.7	85	5	8.9	22.4	1.9	13
132	2016-05-11	18.6	23.3	13	10.3	1011.3	1012.5	1010.2	2.3	76	3.8	6.4	0	11.1	15
133	2016-05-12	20.6	23.9	17.7	6.2	1010.3	1011.3	1008.5	2.8	74	4.9	9.1	0	12.1	15
134	2016-05-13	19.4	22.1	17.6	4.5	1017.7	1020.6	1011.2	9.4	84	5.1	8.5	0	0	9
135	2016-05-14	20	22.5	17.7	4.8	1017.4	1021.1	1014.3	6.8	86	5.8	9.6	0	6	14
136	2016-05-15	19.5	27.1	15	12.1	1012	1015.5	1010.1	5.4	87	5.8	11.3	6.4	3.5	14
137	2016-05-16	18.6	24	14.4	9.6	1016.1	1017	1014.9	2.1	64	3.7	9.5	1.1	10	8
138	2016-05-17	19.8	23.1	15.3	7.8	1016.7	1018.1	1015.3	2.8	40	4.4	7.2	0	10.1	8
139	2016-05-18	20	22.8	16.6	6.2	1016	1017.4	1014.3	3.1	59	4.9	8.8	0	10.3	14
140	2016-05-19	20.5	23.2	18.9	4.3	1013.3	1015.5	1012.1	3.4	82	6.2	10.8	0	7.7	12
141	2016-05-20	19.4	20.4	17.9	2.5	1012	1013.8	1011.1	2.7	93	6.3	10.3	13.2	0	7
142	2016-05-21	19.9	20.5	18.7	1.8	1010.2	1012.2	1008.5	3.7	98	6.3	10.1	10.8	0	9
143	2016-05-22	21	23.4	19.4	4	1011.8	1012.7	1010.6	2.1	86	3.8	7.3	0.1	0.4	15
144	2016-05-23	22	25.5	18.5	7	1010.7	1013.3	1008.4	4.9	77	3.7	5.6	0	7	14
145	2016-05-24	22.2	25.1	20.6	4.5	1009.4	1011.1	1007.6	3.5	76	3.4	5.9	1.4	0	13
146	2016-05-25	22.2	25.1	19.8	5.3	1008.6	1010.2	1007.2	3	88	4.4	7	0	6.2	12
147	2016-05-26	23.3	25.5	21.6	3.9	1008.6	1009.8	1007.2	2.6	93	3.4	6.2	4.9	0	10
148	2016-05-27	21.8	23.3	21	2.3	1009.5	1010.9	1008	2.9	94	4.5	6.9	2.3	0	16
149	2016-05-28	21	21.7	20.4	1.3	1006.9	1009.3	1005.1	4.2	98	3.9	6.1	10.4	0	11
150	2016-05-29	21	22.1	20.5	1.6	1006.1	1007.8	1003.9	3.9	93	4.3	7	22.2	0	15
151	2016-05-30	21.4	23.5	20	3.5	1009.1	1010.3	1007.8	2.5	87	3.1	5.5	0	3.1	19
152	2016-05-31	23	26.8	20.8	6	1006.4	1008.8	1004.3	4.5	88	3.4	6	0	3.3	18
153	2016-06-01	19.9	22.9	18.4	4.5	1004.2	1008	1000.6	7.4	95	5.6	10.3	69.3	0	14
154	2016-06-02	20.6	23.2	17.9	5.3	1008.8	1009.7	1008	1.7	84	5.3	8.5	0	6.6	12
155	2016-06-03	20	21.1	18.1	3	1005.9	1009.6	1003.4	6.2	93	6.8	11.4	17.7	0	2
156	2016-06-04	21.7	24.7	20	4.7	1005.5	1007.8	1003	4.8	82	7.2	13.2	0.3	6.2	23
157	2016-06-05	21.4	24.1	18.5	5.6	1010.6	1011.7	1007.8	3.9	82	5	7.6	0	7.7	13
158	2016-06-06	22.3	25	20.1	4.9	1009.6	1011.6	1008.1	3.5	86	5.3	8.9	0	8.7	12
159	2016-06-07	23.4	26.4	21.5	4.9	1008.8	1009.9	1007.1	2.8	90	4.3	6.6	1.8	4.2	21
160	2016-06-08	23.5	27.3	21.7	5.6	1007.8	1009.5	1006.4	3.1	93	6.7	9.7	3.6	0	12
161	2016-06-09	22.4	23.8	21.8	2	1009.5	1010.5	1007.9	2.6	93	4.8	7.9	0.1	0	13
162	2016-06-10	23.7	25.9	21.4	4.5	1008.7	1010.8	1006.6	4.2	90	5.7	9.8	0	9.5	14
163	2016-06-11	24.8	27.9	23.4	4.5	1006.4	1007.8	1005.3	2.5	90	4.3	8	0	0	27
164	2016-06-12	22.2	24.5	20.8	3.7	1003.7	1007.1	1002.9	4.2	98	7.7	12.5	82	0	8
165	2016-06-13	23.3	27.2	20.6	6.6	1003.6	1005	1002.6	2.4	89	4.1	6.9	2.7	6.9	18
166	2016-06-14	24.7	27.8	22.3	5.5	1002.2	1004.1	1000.5	3.6	87	4.6	8	0	11.4	20
167	2016-06-15	26.2	32.4	22	10.4	1000.4	1002.8	999	3.8	84	5	8.3	61.8	3.4	18
168	2016-06-16	23.2	25.1	21.6	3.5	1004.7	1006	1002.2	3.8	87	4.8	7.8	2.8	0	22
169	2016-06-17	24.5	27.1	21.3	5.8	1007.6	1008.9	1006	2.9	83	5.9	9	0	10	21
170	2016-06-18	26.4	29.6	23.4	6.2	1007.6	1008.8	1006.3	2.5	80	4.9	8.7	0	5.4	15
171	2016-06-19	27.4	30.4	24.2	6.2	1007.4	1009.1	1006.2	2.9	76	6	9.1	0.3	3.8	29
172	2016-06-20	24.9	26.4	23.5	2.9	1005.4	1008.2	1004.1	4.1	95	4.9	9.1	52.4	0	20
173	2016-06-21	27.4	30.6	23.9	6.7	1005	1007	1003.3	3.7	85	3.2	5.1	0.1	5.7	25
174	2016-06-22	28.8	33.8	25.9	7.9	1004.2	1006.3	1002.2	4.1	82	6.1	14.1	2.5	0.8	19
175	2016-06-23	28.4	30.6	26.1	4.5	1003.9	1006.1	1001.1	5	82	3.5	6.2	0	3.8	14
176	2016-06-24	29.6	34.2	23.7	10.5	1003.4	1007.6	1000.3	7.3	77	4.5	8.9	8.3	5.9	14
177	2016-06-25	21.2	23.7	20.2	3.5	1010.6	1012.2	1007.6	4.6	94	3.1	5.6	26.8	0	9
178	2016-06-26	21.2	22.7	20.1	2.6	1011.4	1013.1	1010.3	2.8	88	4.3	8.5	3.9	0	17
179	2016-06-27	23.4	25.6	21.3	4.3	1007.1	1011.1	1005.6	5.5	91	3.3	6.2	4.4	0	15
180	2016-06-28	24.2	26.1	22.9	3.2	1007.6	1009.2	1006.1	3.1	95	4	6.2	13.5	0	8
181	2016-06-29	24.6	26	23.2	2.8	1009.8	1011.2	1008	3.2	92	5.3	10.1	11.4	0	8
182	2016-06-30	28.1	32.5	24.4	8.1	1008.6	1010.6	1006.4	4.2	75	4.9	7.9	0	9.1	14
183	2016-07-01	28.5	32.2	24.9	7.3	1004.7	1007.7	1002.6	5.1	81	7.8	12.7	4.4	1.8	14
184	2016-07-02	27	31.4	24.3	7.1	1005.8	1008.3	1002.5	5.8	86	4.5	10.2	24.2	3.4	18
185	2016-07-03	26.8	30.4	24.3	6.1	1005.6	1008.7	1004.8	3.9	91	3.9	6.6	3.1	0.6	14
186	2016-07-04	28.5	32.1	26.3	5.8	1005.2	1006.8	1003.7	3.1	85	4.2	8.2	0.3	7.3	21
187	2016-07-05	29.4	33.3	25	8.3	1008.5	1011.6	1005.4	6.2	73	4.8	12.9	2.8	10.3	12
188	2016-07-06	28.4	31	25.4	5.6	1011.6	1012.7	1010.5	2.2	87	5.1	8.3	0	9.2	18
189	2016-07-07	28.1	30.2	26.7	3.5	1009.8	1012	1008.1	3.9	92	5.7	9.5	0	8.8	16
190	2016-07-08	27.8	30.3	26.3	4	1006.1	1008.5	1003.9	4.6	88	6.6	10.8	0.2	11.5	17
191	2016-07-09	27.4	29.8	25.8	4	1003.8	1005.9	1002.8	3.1	88	6.7	10.8	2.6	3.1	19
192	2016-07-10	27.6	30.7	26.2	4.5	1001.2	1003.5	999.8	3.7	93	6.2	9.5	2.8	0.9	17
193	2016-07-11	27.2	27.7	26.8	0.9	1000.2	1001.9	999.3	2.6	98	3.7	6.6	34.4	0	13
194	2016-07-12	29.6	32.4	27	5.4	999.7	1000.8	998.6	2.2	84	3.8	7	2.4	1.4	17
195	2016-07-13	30.6	34.6	27.8	6.8	1000.7	1002.3	999.1	3.2	80	4.3	7.5	0	5.5	14
196	2016-07-14	28.9	32.1	27.4	4.7	1002.6	1003.5	1001.4	2.1	88	4.1	7.4	2	1.1	18
197	2016-07-15	30.8	35.5	27.2	8.3	1000.1	1003.7	997.6	6.1	80	4.5	7.3	0.1	9.6	22
198	2016-07-16	26.4	32.7	23.6	9.1	1003.4	1006.3	998.3	8	83	4.4	8.5	11.7	0	15
199	2016-07-17	27.4	29.9	24	5.9	1007.2	1008.2	1005.8	2.4	85	4.5	8.6	0	4.9	20
200	2016-07-18	28.2	30.6	26.1	4.5	1005.9	1007.9	1004	3.9	88	4.9	8.7	1	9.2	14
201	2016-07-19	29.2	31.9	25.7	6.2	1005	1006.2	1003.6	2.6	80	4.4	7.8	0.2	10.2	16
202	2016-07-20	30.4	32.6	28.3	4.3	1004.4	1006.1	1003.4	2.7	82	4.1	7.4	0	11.3	10
203	2016-07-21	32.2	35.6	30	5.6	1005.9	1007.3	1004.7	2.6	70	3.5	7.3	0	12.6	12
204	2016-07-22	33.2	37.1	29.2	7.9	1005.9	1007.2	1004.5	2.7	64	3.7	8.1	0	11.9	18
205	2016-07-23	32.6	35.4	29.6	5.8	1005.9	1007.1	1004.5	2.6	72	4.1	7.2	0	11.7	13
206	2016-07-24	30.8	33.4	28.6	4.8	1007.1	1008.3	1006	2.3	79	5.1	7.5	0	10.5	15
207	2016-07-25	30	32.9	28.2	4.7	1007.6	1009.3	1005.9	3.4	78	4.5	8.6	0	11.4	23
208	2016-07-26	30.9	34.9	28.5	6.4	1005.2	1007.4	1003.4	4	78	4.5	7.8	0	10.9	14
209	2016-07-27	32.8	36.8	29.5	7.3	1004.5	1005.5	1002.9	2.6	72	5.1	9.3	4	7.2	11
210	2016-07-28	32.8	37.9	29.8	8.1	1005.1	1006.1	1004	2.1	73	6	11.7	0	6.5	21
211	2016-07-29	31.9	34.1	30.3	3.8	1006.4	1007.3	1005.4	1.9	79	4.4	6.8	0	10.4	17
212	2016-07-30	30.4	32.5	29	3.5	1007.7	1009.1	1006.5	2.6	81	5.8	11.7	0	10.1	19
213	2016-07-31	30.2	32.3	28.8	3.5	1008.3	1009.7	1007.1	2.6	78	5.9	9.9	0	11.7	18
214	2016-08-01	30.2	32.2	28.8	3.4	1007.2	1009.1	1005.9	3.2	78	5.4	9.7	0	10.1	19
215	2016-08-02	30.8	32.8	28	4.8	1006	1007.4	1004	3.4	77	4.9	8.8	4.4	9.6	17
216	2016-08-03	26.7	31.4	25.1	6.3	1007	1007.6	1005.3	2.3	86	7.8	14.4	8.3	3.2	16
217	2016-08-04	29.1	32.8	25.8	7	1007.3	1008.5	1006.1	2.4	78	4.7	10.1	18.5	9.3	19
218	2016-08-05	29.6	34.5	26.4	8.1	1006.9	1008.6	1004.8	3.8	78	4.9	8.2	5.5	7.4	18
219	2016-08-06	29.4	31.5	27	4.5	1004.8	1007.1	1003.1	4	84	5.1	9.8	0	9.8	18
220	2016-08-07	30	31.9	28.1	3.8	1004	1004.7	1002.7	2	77	5.4	9.1	0	12.1	30
221	2016-08-08	29.6	31.5	28	3.5	1004.4	1005.4	1003.1	2.3	78	6	9.4	0	10.9	10
222	2016-08-09	29.4	32.1	27.4	4.7	1004.2	1005.1	1003.1	2	83	9.5	15.4	3.6	8.8	16
223	2016-08-10	30.1	32.4	28.1	4.3	1006	1007.1	1004.4	2.7	86	6.1	10.7	0.6	9.1	15
224	2016-08-11	30.1	31.5	28.5	3	1007.5	1008.8	1006.4	2.4	80	5.6	10.1	0	10.7	19
225	2016-08-12	30.3	32	29	3	1006.2	1007.7	1004.4	3.3	84	5.5	8.3	0	11.1	18
226	2016-08-13	30.5	32.5	29.1	3.4	1005	1006.5	1003.6	2.9	82	5.1	8.3	0	11.3	12
227	2016-08-14	30.1	32.1	28.6	3.5	1004.4	1005.7	1002.9	2.8	78	4.6	8.4	0	11.8	7
228	2016-08-15	30.2	32.2	28.5	3.7	1002.6	1005.1	1001.2	3.9	80	4.6	8.2	0	10.8	20
229	2016-08-16	30.5	32.5	28.5	4	1002	1003.2	1001.1	2.1	81	4.5	7.7	0	10.9	16
230	2016-08-17	30.5	32.2	28.1	4.1	1002	1003	1000.9	2.1	76	4.5	8.2	0	11.2	25
231	2016-08-18	30.5	32.5	28.7	3.8	1002	1003.1	1000.9	2.2	79	5.5	9.4	0	11	18
232	2016-08-19	31.4	33.8	29.6	4.2	1002.6	1003.5	1001.6	1.9	77	4.7	9.6	0	11.7	20
233	2016-08-20	30.9	34.3	29.6	4.7	1002.9	1004.1	1001.4	2.7	84	5.2	8.3	0	6.8	19
234	2016-08-21	30.5	33	28.4	4.6	1003.3	1004.4	1001.9	2.5	82	5.2	8.2	0	10.5	18
235	2016-08-22	30.4	33	27.5	5.5	1006.1	1007	1004.4	2.6	74	5.2	8.8	0	11.4	11
236	2016-08-23	29.6	33.8	27.1	6.7	1005.8	1007.2	1004.1	3.1	80	3.9	6.4	0	4.5	14
237	2016-08-24	28.9	32.9	24.6	8.3	1004.7	1006	1003.4	2.6	74	4.6	8.3	0	10.6	17
238	2016-08-25	29.9	32.9	25.7	7.2	1003.8	1005.1	1002.4	2.7	77	4	8.3	0	11.6	26
239	2016-08-26	29.2	34.3	27.4	6.9	1006	1008	1003.9	4.1	78	5.6	10.3	0	5	12
240	2016-08-27	27.4	30.9	23.9	7	1008.4	1009.8	1006.6	3.2	63	4.5	9.3	0	8.5	19
241	2016-08-28	26.5	31.3	21.8	9.5	1007.8	1008.9	1006.1	2.8	49	6	13	0	10.7	16
242	2016-08-29	26.2	30.6	22	8.6	1008.2	1009.7	1006.3	3.4	53	4.4	8.8	0	11.2	25
243	2016-08-30	25.8	30.7	21.6	9.1	1006.2	1008.6	1004	4.6	52	5.4	11.1	0	11	21
244	2016-08-31	26.6	31.5	20.3	11.2	1003.2	1006.2	1000.8	5.4	54	4.2	7.8	0	10.9	15
245	2016-09-01	28.3	30.5	24.5	6	1001.2	1002.4	999.6	2.8	57	4.6	8.8	0	6.1	11
246	2016-09-02	27.1	33.5	22.8	10.7	1002.7	1004.1	1001.3	2.8	71	4.2	7.1	0	8.5	10
247	2016-09-03	26.4	30.9	21.9	9	1006.4	1008	1004.1	3.9	79	3.7	6.3	0	10.8	26
248	2016-09-04	26.5	30.9	23.2	7.7	1009.2	1010.3	1007.9	2.4	83	5.4	9	0	2.6	25
249	2016-09-05	27.2	30.1	25.2	4.9	1010	1011.5	1009	2.5	81	4.6	6.8	0	1.7	12
250	2016-09-06	26	27.5	24.7	2.8	1009.2	1010.6	1008	2.6	70	3.3	5.6	0	0	13
251	2016-09-07	21.7	25.1	19.6	5.5	1007.6	1009.1	1006.9	2.2	93	3.6	7.8	20.6	0	11
252	2016-09-08	23.9	28.3	20.1	8.2	1009.3	1010.2	1008	2.2	84	2.7	5.2	0	5.2	18
253	2016-09-09	25.8	29.1	21.2	7.9	1010.4	1011.3	1009.5	1.8	77	4.4	7.3	0	8.4	15
254	2016-09-10	26.4	28.1	25.4	2.7	1010.6	1011.6	1009.6	2	81	3.8	6.6	0	1.2	21
255	2016-09-11	23.6	26.8	21.5	5.3	1012.4	1013.5	1010.5	3	83	4.4	6.9	2	0	16
256	2016-09-12	24.2	28.9	20.1	8.8	1015.1	1016.7	1013.5	3.2	78	4.4	8.3	1.7	8.9	16
257	2016-09-13	24.6	28	20.8	7.2	1016.3	1017.1	1015.3	1.8	80	5.3	8.5	0	2.9	15
258	2016-09-14	23.6	26.2	22.1	4.1	1014.9	1017.2	1013.7	3.5	88	5.7	9.6	25.5	0	12
259	2016-09-15	25.1	26.5	23.6	2.9	1011.6	1014.4	1009.4	5	94	8	14.3	37.6	0	8
260	2016-09-16	25.2	28	22.3	5.7	1006.2	1011.6	1003.3	8.3	95	7.2	11.2	102	0	20
261	2016-09-17	24.3	27.7	22.3	5.4	1008.7	1010.5	1005.7	4.8	87	4.4	8.7	35.9	1.3	21
262	2016-09-18	24.6	28.9	22.5	6.4	1009.1	1010.5	1007.4	3.1	76	6.2	10.9	0	5	18
263	2016-09-19	23.9	28.2	21.3	6.9	1010.8	1013.8	1008.9	4.9	72	5.5	10.4	0	5.8	17
264	2016-09-20	22.9	27	19.2	7.8	1015.9	1017.5	1013.8	3.7	67	3.7	7.9	0	10	11
265	2016-09-21	22.7	25.8	18.9	6.9	1018.4	1020.2	1017.5	2.7	75	3.3	6	0	4.6	14
266	2016-09-22	23.3	26.4	19.5	6.9	1017.3	1019	1015.7	3.3	78	4.3	7.4	0.7	9	20
267	2016-09-23	23.9	26.1	21.7	4.4	1015.4	1017.5	1013.5	4	74	4.1	7.1	0	6.4	17
268	2016-09-24	24.4	26.4	22.5	3.9	1013.5	1015.1	1011.9	3.2	75	4.7	7.9	0	10.5	17
269	2016-09-25	24.8	26.9	21.7	5.2	1012.8	1014.5	1011.7	2.8	77	4.9	8.5	0	10.8	18
270	2016-09-26	25.7	28.5	21.6	6.9	1011.8	1013.4	1010.5	2.9	86	4.8	7.5	0	10.2	13
271	2016-09-27	27.3	30.3	25.1	5.2	1010.5	1012.1	1009	3.1	90	6.1	10.1	0	8.6	17
272	2016-09-28	25.8	29.2	23.3	5.9	1010	1011.2	1008.3	2.9	93	7.5	14	5.2	0.5	14
273	2016-09-29	22.8	23.7	21.8	1.9	1010.6	1011.8	1009.1	2.7	97	7	13.2	15.8	0	13
274	2016-09-30	23.3	26.1	21.9	4.2	1010.6	1012.2	1009.1	3.1	95	2.9	4.5	0	0.5	22
275	2016-10-01	25.3	28.8	22.5	6.3	1013.1	1014.4	1012	2.4	93	3.5	5.1	0	3.2	13
276	2016-10-02	27.2	29.9	25.6	4.3	1011.1	1014	1009	5	84	3.8	7.9	0	8.8	19
277	2016-10-03	23.6	26.8	21.1	5.7	1010.2	1011.7	1009	2.7	84	3.8	7.5	5.9	0	17
278	2016-10-04	23.4	26.9	21.9	5	1010	1012.4	1007.6	4.8	82	4.5	7.8	1.9	1.1	24
279	2016-10-05	24.1	27.4	22.7	4.7	1013.3	1016.2	1009	7.2	93	3.6	7.3	0.7	0.7	18
280	2016-10-06	22.5	25.9	19.8	6.1	1018.8	1020.2	1016.2	4	88	5.5	8.9	2.1	0	13
281	2016-10-07	21.7	23.5	18.9	4.6	1014.8	1020.4	1012.2	8.2	98	3.3	5.6	3.9	0	19
282	2016-10-08	20.8	23.7	19.1	4.6	1014	1017.6	1010.6	7	89	5.2	10.3	22.2	0.4	16
283	2016-10-09	18.2	22.2	15.3	6.9	1019.6	1020.9	1017.6	3.3	71	5.7	10.7	0	6.4	15
284	2016-10-10	18.5	22.7	14.8	7.9	1018.6	1020.9	1017	3.9	68	5.1	10.2	0	6	9
285	2016-10-11	20.2	24.3	16.4	7.9	1018.6	1019.9	1017	2.9	72	4.6	9.1	0	6.3	12
286	2016-10-12	20.4	22.5	19.1	3.4	1021.1	1022.9	1019.6	3.3	69	4.4	8.4	0	0	15
287	2016-10-13	20.6	23	19	4	1020.7	1022	1019.4	2.6	71	3.6	6.9	0	0	11
288	2016-10-14	20	21.4	17.9	3.5	1020.7	1022	1019.5	2.5	86	3.4	7	7.9	0	24
289	2016-10-15	22.3	23.6	20.2	3.4	1019.4	1021.1	1017.6	3.5	80	6.6	10	0	0	16
290	2016-10-16	24	27.7	21.8	5.9	1017.2	1019.2	1015.5	3.7	90	3.6	6.9	0	2.7	13
291	2016-10-17	21.3	23.8	19	4.8	1018.8	1020.5	1017.3	3.2	86	2.7	5.7	0	0.2	17
292	2016-10-18	21.5	24.1	19.8	4.3	1018.6	1020.2	1016.8	3.4	86	6.7	9.7	0	2.4	15
293	2016-10-19	20.8	22.5	19.6	2.9	1016.7	1018.8	1015.2	3.6	93	3.6	5.9	3.5	0	8
294	2016-10-20	21.4	22	20.8	1.2	1014.6	1016.6	1013	3.6	96	6.6	12.1	9.9	0	15
295	2016-10-21	21.8	22.7	21	1.7	1010.6	1014	1008.1	5.9	99	5.8	9.2	26.1	0	8
296	2016-10-22	22.2	22.9	21.8	1.1	1007.4	1011.6	1003.9	7.7	99	8.3	13.1	72.4	0	13
297	2016-10-23	20.7	23.8	19.1	4.7	1012.2	1015.4	1003.5	11.9	88	8.9	13.7	25.4	0.2	22
298	2016-10-24	20.8	24	17.6	6.4	1014.3	1016.6	1012.1	4.5	90	4.1	6.2	0	4.6	15
299	2016-10-25	20.8	22.9	18.3	4.6	1014.2	1016.7	1010.9	5.8	84	4.2	8	0	0	11
300	2016-10-26	20.2	24.5	18	6.5	1015.7	1018	1012.3	5.7	94	5.4	9.8	6.7	0.4	15
301	2016-10-27	20	22.1	18.2	3.9	1016.8	1019.5	1014.6	4.9	98	5.9	9.7	5	0	11
302	2016-10-28	18.6	22.7	15.3	7.4	1018.8	1024.1	1013	11.1	91	5.1	11.1	0.1	0	9
303	2016-10-29	15.4	16.8	14.5	2.3	1027.8	1030.3	1024	6.3	72	4.5	9.1	0	0	20
304	2016-10-30	15.6	18.6	12.8	5.8	1027.9	1030.4	1025.2	5.2	71	4.5	7.6	0	5	17
305	2016-10-31	15.8	17.9	14.4	3.5	1025.6	1028.2	1023.4	4.8	85	3.5	6.5	1.2	0	11
306	2016-11-01	13.8	16.8	10.3	6.5	1030.2	1032	1028	4	72	5.7	11	0.1	6.2	18
307	2016-11-02	12.7	17.7	8.5	9.2	1028.7	1031.8	1026.7	5.1	64	3.2	6.1	0	5.3	11
308	2016-11-03	12.1	18.1	7.2	10.9	1025	1028.5	1021.8	6.7	80	2.9	4.9	0	9.4	15
309	2016-11-04	16.8	20	10.4	9.6	1017	1021.8	1013.6	8.2	71	3.5	5.9	0	9.2	14
310	2016-11-05	18.6	22.9	15.6	7.3	1013.6	1014.6	1012.1	2.5	78	3.6	6.8	0	9	11
311	2016-11-06	18.2	22.7	13.4	9.3	1018.3	1019.8	1014.6	5.2	88	3.8	6	0	9.4	25
312	2016-11-07	19.9	22.6	16.3	6.3	1018.7	1020.5	1016.7	3.8	93	4.1	7.2	1.1	5.7	13
313	2016-11-08	13.1	19.7	10.9	8.8	1025.9	1030.4	1017.6	12.8	80	6.5	14.6	8	0	6
314	2016-11-09	11.2	14	10	4	1028.4	1031.2	1026	5.2	70	4.4	8.7	0	0	14
315	2016-11-10	11.3	14	9.2	4.8	1023.1	1027.2	1020.9	6.3	77	4.7	8.1	0	1.1	17
316	2016-11-11	13.1	16.9	8.1	8.8	1021.4	1023.3	1019.8	3.5	74	4.1	7	0	9.6	12
317	2016-11-12	17.9	21	15.4	5.6	1019.3	1020.6	1017.8	2.8	71	5.1	10	0	5.2	22
318	2016-11-13	18.6	21	16.9	4.1	1017.4	1020	1015	5	93	2.4	4.3	0.5	0	17
319	2016-11-14	18.5	20.5	17.7	2.8	1016.3	1018.6	1014.5	4.1	90	2.1	3.9	1.7	0	16
320	2016-11-15	15.3	18.6	12.7	5.9	1022.7	1024.6	1018.6	6	78	4.4	7.7	0	2.4	18
321	2016-11-16	14.4	16.9	10	6.9	1021.2	1024.6	1019.1	5.5	80	4.2	6.3	0.2	0	11
322	2016-11-17	16.7	17.3	15.8	1.5	1018.7	1020.1	1017.7	2.4	94	5.4	8.8	8.2	0	11
323	2016-11-18	19.5	23.9	17.2	6.7	1014.4	1018.5	1012	6.5	91	3.3	6.1	0	5	9
324	2016-11-19	18.6	21	16.6	4.4	1014.7	1016.8	1012.7	4.1	94	2.7	3.9	0	0	12
325	2016-11-20	18.3	19.7	17.4	2.3	1017.3	1019.6	1016	3.6	95	5.5	8.9	9	0	16
326	2016-11-21	18.3	20.6	17	3.6	1015	1017.2	1012.9	4.3	96	6	9.3	19.8	0	8
327	2016-11-22	12.4	18.1	8.3	9.8	1023.6	1028.4	1017.1	11.3	91	6.4	12.5	1.7	0	8
328	2016-11-23	6	8.5	5	3.5	1029.9	1031.3	1028.2	3.1	88	4.3	9.5	3	0	4
329	2016-11-24	5.3	9.5	1.9	7.6	1029.8	1032.4	1027.3	5.1	72	4.7	9.4	0.8	7	9
330	2016-11-25	9	13	5.8	7.2	1026	1028.7	1024	4.7	73	3.4	6.6	0	0	7
331	2016-11-26	8.6	13.3	6.8	6.5	1021.9	1024.9	1019.8	5.1	93	6.6	12.7	18.2	0	8
332	2016-11-27	9	13.4	6.1	7.3	1024.7	1027.3	1022.7	4.6	69	4	8.5	0	4.9	14
333	2016-11-28	9	14.2	6	8.2	1030	1032.1	1026.9	5.2	67	4.7	7.7	0	7.4	12
334	2016-11-29	9.8	13	5.5	7.5	1031.3	1033	1030.4	2.6	76	2.8	4.6	0	0	7
335	2016-11-30	11.8	14.6	9.9	4.7	1027.6	1031	1025.8	5.2	75	4.8	7.8	0	0	10
336	2016-12-01	10.8	15.2	8.8	6.4	1029.8	1031.5	1027.8	3.7	74	2.8	5.2	0	2.4	12
337	2016-12-02	10.5	15.4	5.3	10.1	1030.9	1033.3	1029.7	3.6	69	3.1	5.2	0	8.3	12
338	2016-12-03	10.6	15.1	4.6	10.5	1025.5	1029.9	1022.5	7.4	84	4	7.1	0	7.9	14
339	2016-12-04	12.6	16.9	9.9	7	1020	1022.6	1018.3	4.3	88	2.5	5.2	3.6	2.8	5
340	2016-12-05	13.8	18.8	8.5	10.3	1020.9	1024.1	1019	5.1	79	2.8	5.2	0	6.5	10
341	2016-12-06	9.3	15.1	5.7	9.4	1028.6	1031.8	1024.1	7.7	70	6.7	13.3	0	7.4	12
342	2016-12-07	9.1	15.5	4.5	11	1023.6	1026.3	1021.6	4.7	75	3.4	5.7	0	6.6	7
343	2016-12-08	9.9	15.1	6.2	8.9	1019.1	1023.8	1015.7	8.1	85	3.4	6.2	0	7.8	11
344	2016-12-09	10.4	16	7.3	8.7	1021.4	1024.7	1017.5	7.2	79	4.6	7.4	0	6.3	5
345	2016-12-10	9.7	14.1	6.9	7.2	1025.1	1026.9	1023.9	3	75	4.9	8.7	0	4.4	12
346	2016-12-11	10.5	14.1	6.6	7.5	1024.4	1026.8	1021.9	4.9	73	6.1	9.6	0	7	8
347	2016-12-12	13.7	16.8	12.2	4.6	1018.9	1022.2	1017.2	5	89	4.4	7.6	0.2	0.6	16
348	2016-12-13	12.2	14.2	10.1	4.1	1018.3	1021.4	1016.4	5	97	4.6	8.2	5.8	0	10
349	2016-12-14	7.2	10.1	5.4	4.7	1027.2	1029.3	1021.4	7.9	71	5.4	10.7	0.2	2.2	11
350	2016-12-15	3.9	7.8	0.7	7.1	1031.4	1032.9	1029.2	3.7	58	5.2	9.8	0	7.4	5
351	2016-12-16	3.8	8.9	1	7.9	1032.6	1034.6	1031.2	3.4	70	3.6	6.8	0	7.5	8
352	2016-12-17	7.1	11.8	-0.5	12.3	1029.1	1031.7	1026.7	5	78	4.2	7.2	0	8.5	11
353	2016-12-18	12.4	17.3	7.8	9.5	1024.8	1027.8	1022.6	5.2	83	2.8	6	0	3.4	3
354	2016-12-19	14.2	19	11.3	7.7	1021.7	1023.4	1020.1	3.3	90	2.8	5.4	0	1.4	9
355	2016-12-20	13.4	13.9	12.3	1.6	1022.6	1024.7	1021.7	3	98	5.4	8.7	9.2	0	9
356	2016-12-21	14.7	17.5	12.6	4.9	1018	1023.1	1012.8	10.3	96	5.9	12.7	3.6	0.6	9
357	2016-12-22	9.2	12.6	7.5	5.1	1022.6	1024.1	1018.8	5.3	80	7.1	12.9	0.1	0	11
358	2016-12-23	7.3	11.5	4.5	7	1027.4	1029.5	1023.9	5.6	72	3.8	7.1	0	4.9	3
359	2016-12-24	7.6	11.1	3.7	7.4	1028.2	1030	1025.7	4.3	72	5.2	7.8	0	2.2	12
360	2016-12-25	11.8	12.4	9.2	3.2	1024	1027.9	1021.6	6.3	89	5.7	9.5	4.2	0	13
361	2016-12-26	11	13.3	9.2	4.1	1020.4	1024	1017.4	6.6	98	6.1	11.3	19	0	6
362	2016-12-27	5.4	9.3	3.3	6	1030.8	1033.4	1024	9.4	68	6.1	12.9	0.6	4	7
363	2016-12-28	3.9	7.8	1.4	6.4	1031.2	1033.4	1029.5	3.9	70	3.8	7.6	0	1.6	5
364	2016-12-29	4	7.9	1.4	6.5	1034	1036	1031.4	4.6	67	3.8	7.3	0	6.3	9
365	2016-12-30	5.6	10.8	0	10.8	1031.6	1034.8	1028.9	5.9	72	3.7	6.6	0	5.1	14
366	2016-12-31	7.3	13.9	2.3	11.6	1028.9	1030.7	1027.6	3.1	90	2.8	5	0	6.9	15
367	2017-01-01	10.1	14.4	4.6	9.8	1025.2	1028.8	1021.9	6.9	94	3.9	7.2	0	2.2	7
368	2017-01-02	12.4	16.8	9.5	7.3	1023	1025.2	1020.9	4.3	86	3.3	5.7	0	0.9	12
369	2017-01-03	8.8	12.8	5.7	7.1	1025	1027.2	1023.1	4.1	96	2.9	4.5	0	2.1	12
370	2017-01-04	11.9	14.5	9.5	5	1021.6	1024	1020.2	3.8	93	5.2	8.3	0	0.3	8
371	2017-01-05	10.8	12.3	10.4	1.9	1019.8	1021.6	1017.6	4	98	7	10.7	31.7	0	9
372	2017-01-06	12	14.3	10.3	4	1020.4	1023	1018.5	4.5	96	4.3	7	7.9	0	6
373	2017-01-07	12	13.6	9.7	3.9	1015	1019.2	1012.1	7.1	98	6.6	10.2	33.8	0	7
374	2017-01-08	7.8	9.7	7	2.7	1018.1	1020.4	1015.4	5	88	6.2	13.3	0.1	0	11
375	2017-01-09	6.8	8.1	5.3	2.8	1023.7	1025.8	1020.3	5.5	65	4.7	10.7	0	0.2	13
376	2017-01-10	6.3	9	2.9	6.1	1025.8	1027.6	1024.4	3.2	66	2.8	5.3	0	0	11
377	2017-01-11	6.3	8.4	5.3	3.1	1027.2	1029.3	1024.6	4.7	76	3	5.6	0.5	0	4
378	2017-01-12	4.8	5.9	3.1	2.8	1023.3	1027.4	1021	6.4	90	2.6	4.4	7.4	0	8
379	2017-01-13	6.1	11	2.8	8.2	1021.7	1022.9	1020.2	2.7	72	5	8.2	0	7.9	6
380	2017-01-14	4.6	9.1	2	7.1	1027.2	1029.2	1022.9	6.3	63	3.5	8	0	8.8	16
381	2017-01-15	4.4	7.9	2.4	5.5	1029.8	1031.5	1028	3.5	64	4.2	7.4	0	3.3	11
382	2017-01-16	4.3	9.3	0.4	8.9	1029	1030.4	1027.3	3.1	71	4.2	6.2	0	5.2	12
383	2017-01-17	6.3	9.4	1.8	7.6	1028.6	1030.2	1026.2	4	80	5	8	0	0	10
384	2017-01-18	8	8.7	7.1	1.6	1027.4	1029.3	1025.7	3.6	93	5.7	8.7	4.1	0	7
385	2017-01-19	7.3	8.2	6.7	1.5	1026.2	1027.4	1024.3	3.1	86	2.8	5.2	1.1	0	9
386	2017-01-20	3.2	7.3	0.3	7	1031.9	1034.1	1026.6	7.5	48	5.7	11.2	0	8.5	12
387	2017-01-21	1.4	7.6	-4.2	11.8	1031.1	1034.2	1027.2	7	59	3.4	5.5	0	8.5	16
388	2017-01-22	3.3	8.1	-0.2	8.3	1033.4	1036.2	1030.1	6.1	52	3.7	7.3	0	7.6	2
389	2017-01-23	2	7.9	-3.3	11.2	1035	1037	1033.6	3.4	62	3	5.5	0	8.8	11
390	2017-01-24	3.6	8.2	-1.3	9.5	1035	1036.5	1034	2.5	73	4.5	7.3	0	7.6	13
391	2017-01-25	6.2	10.3	3.3	7	1033.2	1035.5	1031.4	4.1	76	5.7	8.7	0	7.7	10
392	2017-01-26	7.6	11.2	2.4	8.8	1028.7	1032.8	1025.5	7.3	85	4	6.4	0	8.8	13
393	2017-01-27	8	11.2	3.1	8.1	1027.8	1029.4	1025.5	3.9	79	4.8	9.6	0	1.9	11
394	2017-01-28	9.2	13.2	4.4	8.8	1022	1029.2	1018.1	11.1	87	4.2	7.2	0	6.9	21
395	2017-01-29	14.1	22.5	9.7	12.8	1016.8	1020.4	1013.9	6.5	78	6.1	13.6	0	4.8	16
396	2017-01-30	4.4	11.3	2.7	8.6	1030.8	1033.7	1020.5	13.2	66	5.9	11.5	0.2	6.6	11
397	2017-01-31	3.8	7.1	-0.2	7.3	1029.4	1033.6	1026.5	7.1	62	4.2	6.9	0	3.6	16
398	2017-02-01	4.9	6.9	4.1	2.8	1031.6	1034.6	1027.3	7.3	69	3.9	7.1	0	0	13
399	2017-02-02	4.4	8.1	1.2	6.9	1032	1034.8	1029.2	5.6	71	4.5	7.4	0	3.2	12
400	2017-02-03	8.2	9.6	4.7	4.9	1024.8	1029.3	1021.8	7.5	86	3.4	6.3	0	0	12
401	2017-02-04	9.1	10.4	8.2	2.2	1019	1023.2	1016.3	6.9	94	2.1	4.1	5.1	0	11
402	2017-02-05	7.2	9.7	4.2	5.5	1020	1022	1017.3	4.7	85	4.4	8.8	0	1.4	14
403	2017-02-06	5.5	10.9	1.2	9.7	1025.6	1027.4	1021.7	5.7	75	4.5	7.5	0	8.4	12
404	2017-02-07	6.5	10	3.8	6.2	1025.4	1028.2	1022.8	5.4	67	4.8	7.8	0	2.2	20
405	2017-02-08	4.9	6.9	3.4	3.5	1022.7	1024.7	1020.7	4	90	3.8	7.5	10.5	0	9
406	2017-02-09	2.6	5.7	1	4.7	1026	1027.6	1024.3	3.3	64	6.2	12.6	0.5	3.7	12
407	2017-02-10	2.7	6.6	-0.3	6.9	1028	1029.8	1025.9	3.9	47	6.4	12.7	0	8.6	9
408	2017-02-11	3.4	8.7	0.2	8.5	1031.2	1033.2	1029.1	4.1	40	3.7	7.4	0	10	11
409	2017-02-12	3.9	10.1	-2.7	12.8	1031	1032.6	1029.6	3	63	3.1	6.1	0	8.7	7
410	2017-02-13	7.7	11.2	3.4	7.8	1031.6	1033.3	1030.3	3	70	3.1	5.7	0	9	15
411	2017-02-14	7.2	13.3	1.3	12	1033.9	1035.8	1032.3	3.5	72	3.7	6.8	0	9.1	11
412	2017-02-15	9.8	13.5	5.1	8.4	1028.2	1033.3	1024.6	8.7	75	4.6	8	0	8.7	11
413	2017-02-16	12.6	15.8	9.7	6.1	1018.6	1024.6	1015.2	9.4	75	4.6	9	0	2.2	12
414	2017-02-17	10.4	15.9	6.9	9	1023.8	1028.9	1016.3	12.6	74	5.3	10.5	0	0	9
415	2017-02-18	6.6	9.4	3.9	5.5	1028.4	1030.1	1026.6	3.5	76	3.2	6	1.2	8.3	16
416	2017-02-19	11.8	16.5	6.6	9.9	1016.3	1027.4	1009.8	17.6	72	4.5	9.3	0	8.1	15
417	2017-02-20	11.8	17.8	5.4	12.4	1019	1029.2	1009.7	19.5	64	8.4	15	0	0	11
418	2017-02-21	6.8	9.3	4	5.3	1026.1	1030.4	1020.6	9.8	73	5.9	9	0	0	12
419	2017-02-22	7.2	11	4.4	6.6	1018.6	1022	1015.8	6.2	87	5.5	10.5	2.2	0	11
420	2017-02-23	4.6	7.1	3.5	3.6	1026.2	1028.2	1021.6	6.6	68	4.5	8.3	0	0	13
421	2017-02-24	5.5	10	2.7	7.3	1028.4	1030.3	1026.4	3.9	59	3.3	6.1	0	4.2	10
422	2017-02-25	5.8	10.2	0	10.2	1025.6	1028.7	1022.8	5.9	75	3.6	5.8	0	8.5	11
423	2017-02-26	7.5	13.7	3.4	10.3	1025.2	1026.6	1023.9	2.7	76	3.6	5.6	0	7.1	17
424	2017-02-27	7.3	13.3	3.7	9.6	1027.8	1029.2	1025.9	3.3	76	4.8	8	0	8.5	12
425	2017-02-28	9.2	12.1	5.9	6.2	1024	1027.7	1020.5	7.2	77	5	7.7	0	8.6	12
426	2017-03-01	11.4	17.3	5.3	12	1018.9	1021.3	1016.9	4.4	64	8.2	14.6	0	7.9	9
427	2017-03-02	6.1	12.8	3.6	9.2	1025	1027.5	1020	7.5	55	6.6	12.4	0	9.8	11
428	2017-03-03	8.7	11.8	2.4	9.4	1019.7	1023.9	1016.1	7.8	67	5.9	9.6	0	10	13
429	2017-03-04	11.2	18.5	5	13.5	1015.8	1017.2	1013.8	3.4	77	4.3	6.8	0	8.8	15
430	2017-03-05	11.1	12.7	10.2	2.5	1015.4	1016.8	1014	2.8	89	3.6	6.4	9.2	0	11
431	2017-03-06	9.2	13	7.2	5.8	1020.2	1022.6	1016	6.6	62	4.5	8	0	8.6	11
432	2017-03-07	8.2	12.8	2.6	10.2	1020.9	1022.5	1018.8	3.7	60	3.6	5.7	0	9.7	12
433	2017-03-08	8.9	14.3	2.1	12.2	1021.4	1023.5	1018.8	4.7	56	5.5	9.5	0	8.8	15
434	2017-03-09	9.4	15.1	3.4	11.7	1019.2	1021.4	1016.7	4.7	81	3.8	5.4	0	8	8
435	2017-03-10	11.6	14.6	10	4.6	1017.9	1019.3	1016.3	3	78	3.9	6.8	0	0	10
436	2017-03-11	11	13.4	9.3	4.1	1020.8	1022.3	1019.3	3	85	4.8	8.1	0	0.7	16
437	2017-03-12	11.1	11.7	10.6	1.1	1017.5	1021.5	1014.5	7	92	5.1	8.4	10	0	22
438	2017-03-13	8.4	10.8	6.2	4.6	1018.7	1021.8	1016.4	5.4	91	5.1	10.5	28.9	0	5
439	2017-03-14	8.3	13.5	5	8.5	1024.8	1026.3	1021.6	4.7	61	4.9	8.8	0.5	10.2	18
440	2017-03-15	7.4	11.6	1.7	9.9	1024.8	1027.2	1021.8	5.4	69	4.7	8	0	8.1	15
441	2017-03-16	9.1	12.1	7.5	4.6	1022	1023.9	1020.4	3.5	74	4.3	7.8	0.5	1.9	9
442	2017-03-17	9.1	12	3.9	8.1	1022.6	1024.6	1020.8	3.8	77	5.2	7.9	0	7.1	18
443	2017-03-18	10.9	12.3	10	2.3	1022	1023.5	1020	3.5	77	3.2	5.8	0	0	14
444	2017-03-19	10.4	11.9	9.9	2	1022.8	1024.5	1020.1	4.4	93	5.5	9	7.9	0	9
445	2017-03-20	11.5	13.4	10.3	3.1	1016.1	1021.8	1013.6	8.2	93	5.5	10.3	18.1	0	5
446	2017-03-21	11.4	16.1	9	7.1	1022.6	1024.8	1017.7	7.1	76	5.9	10.5	1.1	5.9	9
447	2017-03-22	8.8	10.4	8.1	2.3	1019.5	1023.8	1016.5	7.3	80	5.6	10.3	7.4	0	7
448	2017-03-23	9.8	12.4	8	4.4	1020	1022.2	1017	5.2	89	4.8	7.2	2.2	0	16
449	2017-03-24	9.5	11.4	8.1	3.3	1020.6	1023.7	1018.5	5.2	87	3.3	5.4	5.3	0	8
450	2017-03-25	10.3	14.9	6.8	8.1	1021.5	1023.1	1020.1	3	75	4.7	8.3	1.8	4.1	6
451	2017-03-26	13.3	18.8	8.2	10.6	1022.6	1023.7	1020.7	3	57	5.9	11.4	0	9.1	20
452	2017-03-27	13.2	18.5	7.4	11.1	1024.2	1026.8	1022.1	4.7	52	4	7.2	0	10.6	11
453	2017-03-28	15.8	20	11.9	8.1	1019	1023.4	1015.7	7.7	54	5	11	0	5.9	8
454	2017-03-29	13.9	17.6	11.3	6.3	1020.8	1022.8	1017.9	4.9	76	5.2	7.9	0	3.9	12
455	2017-03-30	10.6	11.6	9.7	1.9	1020.2	1024	1016.8	7.2	92	5.5	8.6	11.3	0	11
456	2017-03-31	11.1	14.9	7.7	7.2	1021	1023	1017.2	5.8	75	5.8	9.9	10.8	2.5	9
457	2017-04-01	11	16.2	5.8	10.4	1021.8	1023.9	1019.6	4.3	57	5.4	10.4	0.8	4.7	10
458	2017-04-02	13.5	21.7	7.6	14.1	1021.9	1023.8	1020.4	3.4	64	5	8.3	0	9.8	12
459	2017-04-03	14.8	19.1	10.2	8.9	1023.2	1025.7	1021.6	4.1	66	4.3	7.6	0	10.1	16
460	2017-04-04	15.2	18.2	12.7	5.5	1018.6	1022.8	1014.4	8.4	74	5.5	10.8	0	4.8	12
461	2017-04-05	18.5	22.6	16.3	6.3	1012.4	1015.1	1010.2	4.9	73	5.9	12	0	2.4	17
462	2017-04-06	17.4	23.1	14.9	8.2	1010.6	1012.7	1009	3.7	87	4.4	8	8.3	0	10
463	2017-04-07	15.4	16.6	14.6	2	1012	1013.6	1010.5	3.1	96	3.6	6.2	18.7	0	7
464	2017-04-08	14.2	16.6	13.2	3.4	1012.3	1014.6	1009.2	5.4	97	7.6	11.1	0	0.9	9
465	2017-04-09	12.4	14.6	11.3	3.3	1010.8	1012.8	1009	3.8	98	7.6	11.5	25.3	0	7
466	2017-04-10	11.8	13.5	10.1	3.4	1008.7	1012.8	1006.1	6.7	98	3.8	9.5	19.1	0	10
467	2017-04-11	11.5	13.4	9.9	3.5	1013.4	1016.2	1007.8	8.4	90	4.7	8.2	2.9	0	16
468	2017-04-12	13.4	17.9	11.2	6.7	1019.4	1020.8	1016.2	4.6	61	4.6	8	0	8.7	11
469	2017-04-13	14	19.1	7	12.1	1019.6	1022.2	1016.5	5.7	62	4.1	7.6	0	11.4	13
470	2017-04-14	17.8	23	12.4	10.6	1013.1	1017.2	1010.6	6.6	56	4.7	8.2	0	10.4	8
471	2017-04-15	20	24.9	13.8	11.1	1011.7	1013.3	1010.6	2.7	72	4.3	7.1	0	10.9	21
472	2017-04-16	18.1	23	15.1	7.9	1010.6	1013.1	1007.7	5.4	89	4.1	5.7	0	9.7	17
473	2017-04-17	20.8	23.3	17.5	5.8	1004.8	1008.5	1003.1	5.4	84	7.1	13.3	13	3.4	10
474	2017-04-18	21.4	28.1	16.7	11.4	1005.4	1008.8	1003.4	5.4	65	5.9	11.6	0	9.6	18
475	2017-04-19	17.9	20.4	13.6	6.8	1010.3	1012.9	1007.6	5.3	70	5.2	9.5	0	8.3	16
476	2017-04-20	20.2	25.8	16.2	9.6	1008.3	1010.5	1005.9	4.6	81	5.6	9.2	6	7.7	13
477	2017-04-21	18.6	22.8	16.5	6.3	1011.4	1013	1009.7	3.3	69	3.8	7.5	0.3	2	19
478	2017-04-22	16.2	21.2	13.2	8	1015.4	1016.9	1012.5	4.4	67	4	9	0.5	9.2	21
479	2017-04-23	15.8	19.4	11.1	8.3	1017	1018.7	1015.3	3.4	66	4.8	7.8	0	10	16
480	2017-04-24	17.4	20.9	14.8	6.1	1015.6	1017.3	1013.5	3.8	76	4.8	8.2	0	10.7	10
481	2017-04-25	18.4	21.7	16.1	5.6	1014	1015.7	1012.1	3.6	86	5.4	8.3	10.3	3.4	16
482	2017-04-26	16.9	20.4	15.2	5.2	1015.4	1018.7	1011.7	7	80	7.3	11.8	27.9	0	17
483	2017-04-27	16.3	21.8	12.6	9.2	1018	1019.8	1015.8	4	54	4.6	8.7	0	5.5	15
484	2017-04-28	18.2	23.3	12.3	11	1014.1	1018.1	1011.2	6.9	53	5.5	9	0	11.5	4
485	2017-04-29	21.6	26.9	16.4	10.5	1011.8	1013.5	1010.2	3.3	50	4.3	7.8	0	11	9
486	2017-04-30	21.7	26.2	16.9	9.3	1011.2	1012.6	1009.9	2.7	54	4.3	7.8	0	12	23
487	2017-05-01	20.2	23	17.2	5.8	1012.8	1014.5	1011.5	3	83	5.1	8.3	0	5.9	12
488	2017-05-02	18.3	20.7	16.9	3.8	1015.6	1017.3	1012.8	4.5	88	5.6	10.9	3.4	0	12
489	2017-05-03	18.6	20.7	17	3.7	1015.8	1018	1013.4	4.6	86	5.2	10	0	0.7	21
490	2017-05-04	19.9	21.9	18.2	3.7	1011	1014.2	1009.5	4.7	90	4.8	10	3.2	0	16
491	2017-05-05	19.8	22.5	18.3	4.2	1015.1	1017.8	1012.6	5.2	84	6.1	11	0	0	17
492	2017-05-06	19.1	21.7	16.3	5.4	1018.8	1020.8	1017.4	3.4	82	4.2	7	0	7.7	21
493	2017-05-07	19.4	22.1	17.1	5	1017.4	1019.6	1015.3	4.3	70	3.5	6	0	3.1	14
494	2017-05-08	17.9	18.6	14.7	3.9	1010.8	1016.7	1006.8	9.9	79	4.5	8.5	25.7	0	15
495	2017-05-09	20.6	24	18.1	5.9	1009.6	1012.1	1006.6	5.5	74	7.1	14.5	0.8	9.1	14
496	2017-05-10	23.2	30.2	14.8	15.4	1013.2	1015.3	1011.7	3.6	62	4.6	9	0	11.9	18
497	2017-05-11	24.6	28.5	18.7	9.8	1011.9	1013.3	1009.3	4	64	3.3	8.6	0	10.9	9
498	2017-05-12	19.2	24.5	17.6	6.9	1009	1012	1007.2	4.8	90	5.5	9.7	22.3	0	16
499	2017-05-13	21.5	27.5	16.5	11	1008.8	1011.4	1007.1	4.3	76	4.7	7.5	0	11.9	14
500	2017-05-14	21.6	26.7	17.7	9	1011.5	1013.7	1008.2	5.5	83	5.8	9.2	0	10.1	26
501	2017-05-15	19.8	22.1	18.7	3.4	1014	1014.9	1011.9	3	79	7.7	11.6	0	2.3	19
502	2017-05-16	19.4	22.7	17.6	5.1	1011.5	1013.6	1010.3	3.3	72	4.7	7.5	0	4.2	22
503	2017-05-17	19.1	23.2	12.4	10.8	1012.3	1013.6	1010.8	2.8	74	4.2	7	0	12.2	17
504	2017-05-18	21.3	24.3	18.8	5.5	1015	1016.5	1013.5	3	74	5.7	9.6	0	12.8	16
505	2017-05-19	21.3	23.8	19.5	4.3	1014	1015.8	1012.2	3.6	78	5.3	9.7	0	9.1	13
506	2017-05-20	22.8	25.4	20.9	4.5	1011	1013.1	1009.3	3.8	83	5.8	10.5	0	9.8	14
507	2017-05-21	22.3	24.6	20.5	4.1	1010.7	1012.1	1009.3	2.8	81	5.9	9.9	0	12	28
508	2017-05-22	22.6	25.1	20.5	4.6	1010	1011.7	1008.5	3.2	89	5.4	9.5	0	11.3	12
509	2017-05-23	22.2	23.8	21.5	2.3	1006.8	1009.9	1005	4.9	96	4.2	8.2	36.2	0	5
510	2017-05-24	20.8	22.9	19.6	3.3	1008.8	1011.1	1006	5.1	85	4.7	10.5	1.4	0	14
511	2017-05-25	22.4	28.1	16.5	11.6	1010.4	1012.1	1009.3	2.8	58	3.6	6.8	0	8.8	21
512	2017-05-26	21.5	24.3	18.9	5.4	1011.9	1012.9	1010.2	2.7	68	5.3	8.7	0	11.5	15
513	2017-05-27	22	25	18.1	6.9	1012.2	1013.5	1011.1	2.4	76	4.4	7	0	12.2	15
514	2017-05-28	22.9	26	20.6	5.4	1012.4	1013.7	1011.1	2.6	77	4.2	6.8	0	8.9	17
515	2017-05-29	22.9	26.1	20.4	5.7	1012	1014.1	1009.9	4.2	81	6	9.8	0	11.6	14
516	2017-05-30	24	27	21.7	5.3	1007.8	1011.5	1005.1	6.4	85	4.6	9.5	0	9.4	22
517	2017-05-31	26.5	31.1	23.7	7.4	1002.6	1005.5	999.9	5.6	75	3.1	6.9	0	3.8	22
518	2017-06-01	25	27	23.1	3.9	1000.5	1001.6	999.5	2.1	86	3.4	6.3	1.5	1.5	7
519	2017-06-02	23.6	26.4	22.1	4.3	1004.2	1005.5	1001.1	4.4	81	6.1	9.9	0	5.4	12
520	2017-06-03	23.1	25.9	21.4	4.5	1007	1008.5	1004.8	3.7	72	6.1	9.8	0	9.5	14
521	2017-06-04	22.6	25.2	17.5	7.7	1009.8	1011.2	1008	3.2	67	6.9	11	0	12.4	22
522	2017-06-05	20.8	22.5	18.8	3.7	1011	1012.3	1010.2	2.1	82	6.2	10.6	16.5	0	18
523	2017-06-06	24.1	28.1	19.2	8.9	1007.7	1011	1006.2	4.8	84	5.6	10.1	12.5	1.3	14
524	2017-06-07	23.5	27.6	19.8	7.8	1010.9	1012.2	1009.1	3.1	67	4.5	8.1	0	8.9	19
525	2017-06-08	24	27.1	19.2	7.9	1011.9	1013.5	1010.3	3.2	74	4.7	7.6	0	10.2	17
526	2017-06-09	25	28.2	23.4	4.8	1008.5	1011.5	1006.9	4.6	82	5.4	8.3	0	4	14
527	2017-06-10	24.4	26	23.3	2.7	1004	1009.1	999.9	9.2	96	5.2	10.4	36.6	0	11
528	2017-06-11	23.3	26.1	22.1	4	1007.5	1010.2	1001.8	8.4	90	4.9	7.5	5.3	0.9	12
529	2017-06-12	20.4	22.5	19.3	3.2	1010.6	1011.5	1009.2	2.3	93	7.1	11.5	44.7	0	15
530	2017-06-13	21	21.7	20.4	1.3	1011.4	1012.7	1010.5	2.2	95	4.3	8.4	38.9	0	8
531	2017-06-14	22	25.6	19.3	6.3	1011.6	1012.3	1010.1	2.2	82	4	7.3	0.9	5.4	12
532	2017-06-15	21.8	25.1	16.7	8.4	1011.2	1012.8	1010	2.8	76	3.1	6	0	9.3	25
533	2017-06-16	23	24.9	21.2	3.7	1009.2	1010.5	1008	2.5	72	4	7.5	0	5.1	25
534	2017-06-17	23	25.4	20.2	5.2	1008.5	1009.7	1007.6	2.1	76	4.1	7.4	0	12.3	26
535	2017-06-18	23.9	25.7	22.4	3.3	1008.9	1010.2	1007.4	2.8	83	4.7	8.5	0	6.5	24
536	2017-06-19	23.5	24	23	1	1005.5	1008.7	1003.5	5.2	96	4	7.7	33.7	0	18
537	2017-06-20	25.2	29.7	22.5	7.2	1002.4	1004.4	1000.8	3.6	89	5.5	8.8	13.3	2.6	24
538	2017-06-21	24	24.7	23.3	1.4	1005	1006.7	1003	3.7	97	4.4	6.7	1.1	0	34
539	2017-06-22	23	24.1	21.9	2.2	1005.7	1006.6	1004.4	2.2	97	5.2	8.4	27.3	0	24
540	2017-06-23	23.9	26.3	23	3.3	1005.3	1006.8	1003.2	3.6	98	2.6	5.4	3	0	25
541	2017-06-24	24.3	25.1	23.4	1.7	1001.4	1004.7	999.4	5.3	100	3.6	6.5	50.1	0	12
542	2017-06-25	23.8	25.1	23	2.1	1003	1004.5	1001.5	3	97	4	6.9	41.8	0	14
543	2017-06-26	25.1	28.4	22.2	6.2	1006.1	1006.9	1004.4	2.5	86	4.9	7.7	0.1	0.4	25
544	2017-06-27	25.4	28.5	23.8	4.7	1008.3	1009.3	1006.8	2.5	83	5.3	9.6	0	4.7	21
545	2017-06-28	24	25.4	23.1	2.3	1010.3	1011.3	1008.8	2.5	87	3.5	5.7	0.1	0	20
546	2017-06-29	24.1	26.8	22.4	4.4	1008.9	1010.7	1007.6	3.1	95	2.9	4.9	21.2	0	15
547	2017-06-30	27.2	31.1	23.9	7.2	1007	1008.9	1005.4	3.5	83	2.9	5.2	0	5.9	25
548	2017-07-01	27.1	30.5	24.9	5.6	1005.1	1007.2	1002.9	4.3	89	3.9	6.4	37.3	6.6	26
549	2017-07-02	27.6	31.6	24.3	7.3	1005	1006.3	1004	2.3	88	4.2	8.2	1.7	4.4	17
550	2017-07-03	28.5	31	25.8	5.2	1005.8	1007.1	1004.3	2.8	84	4.6	8.4	1	9.5	23
551	2017-07-04	28.4	31.4	26.6	4.8	1007	1008.7	1005.2	3.5	78	4.9	8.7	0	7.6	11
552	2017-07-05	29.6	33.8	27.3	6.5	1008.6	1009.8	1007.1	2.7	77	5.1	10.3	0.1	9.4	33
553	2017-07-06	29.1	33.7	26.5	7.2	1007.8	1011.1	1005.6	5.5	82	3.7	7	0	9.4	29
554	2017-07-07	30.6	35	27.7	7.3	1006.1	1007.3	1005.3	2	73	6	8.9	0	9.4	14
555	2017-07-08	30.9	35	28.5	6.5	1006.2	1007.3	1005	2.3	72	4.4	7.7	0	8.3	22
556	2017-07-09	30	32.9	27.7	5.2	1005	1006.9	1003.2	3.7	75	7.2	11.6	0	4.1	20
557	2017-07-10	29.3	33.5	25.9	7.6	1002.9	1005.5	1001	4.5	79	7.4	11.8	3.6	3.6	16
558	2017-07-11	29.2	32.8	26	6.8	1007.5	1008.9	1005.5	3.4	81	3.2	5.3	0.2	9.1	17
559	2017-07-12	31.8	35.9	27.6	8.3	1008.7	1009.9	1006.9	3	70	3.7	7.2	0	10.5	27
560	2017-07-13	32.4	36.3	29.3	7	1006.6	1008.2	1005.1	3.1	68	3.4	7.1	0	8.1	25
561	2017-07-14	31.4	34.9	29.1	5.8	1006	1006.9	1004.6	2.3	74	3.7	6.8	0	10.2	20
562	2017-07-15	30.7	33.9	28.7	5.2	1007.5	1008.4	1006.1	2.3	76	4.3	8.5	0	11.7	23
563	2017-07-16	30.8	34.1	28.4	5.7	1009.3	1010.8	1007.8	3	72	4.2	8.4	0	11.4	21
564	2017-07-17	30.9	34	29.2	4.8	1010.4	1011.9	1008.7	3.2	74	4.8	7.9	0	12.4	20
565	2017-07-18	32.3	36.8	29.3	7.5	1009	1010.5	1007.3	3.2	68	4.1	7.7	0	4.3	23
566	2017-07-19	32.6	36.3	28.8	7.5	1006.9	1009.2	1004.3	4.9	70	4.1	6.9	0	11.5	21
567	2017-07-20	33.7	37.5	30.4	7.1	1006.3	1007.5	1005	2.5	63	4.1	7.3	0	11.4	25
568	2017-07-21	33.6	37.8	30.5	7.3	1007.8	1009.1	1006.4	2.7	64	4.2	6.5	0	12	31
569	2017-07-22	33.4	37.3	30.3	7	1008.6	1010.1	1007.5	2.6	70	3.7	7	0	8.9	17
570	2017-07-23	32.8	35.8	28.9	6.9	1006	1008.6	1004.2	4.4	72	3.4	6.1	0	11	39
571	2017-07-24	33.5	37.4	29	8.4	1003.5	1005.3	1001.9	3.4	67	3.1	5	0	10.2	25
572	2017-07-25	33.9	39.3	28.8	10.5	1003.3	1004.3	1002.6	1.7	65	3.9	5.9	0	3.8	25
573	2017-07-26	31.6	34.6	29.1	5.5	1004.2	1005.3	1002.7	2.6	83	5.4	9.4	0	3.9	34
574	2017-07-27	31.6	33.8	29.4	4.4	1004.9	1005.7	1003.5	2.2	74	5.2	8.7	0	11.1	20
575	2017-07-28	31.2	33.2	29.2	4	1006.2	1007.3	1005.2	2.1	77	4.8	8.9	0	11.5	19
576	2017-07-29	30.9	33	29.3	3.7	1005.2	1007.3	1003.2	4.1	77	5.1	9.4	0	10.9	18
577	2017-07-30	30.4	32.6	29.1	3.5	1002.4	1004.7	1001.1	3.6	82	5.7	10	4.8	5	19
578	2017-07-31	30.9	33.3	28.5	4.8	1000.8	1002.2	1000	2.2	80	7.1	12.8	2.9	9.8	14
579	2017-08-01	30.7	32.3	29.1	3.2	1002	1003.2	1000.9	2.3	80	6.5	13.3	0	7.8	35
580	2017-08-02	30.5	33.3	29.2	4.1	1001.7	1004	999.4	4.6	80	5.4	12.7	0	9.3	24
581	2017-08-03	31	34.4	29	5.4	999.4	1001.7	997.5	4.2	77	5.9	11.6	0	11.7	23
582	2017-08-04	32	35.4	29.7	5.7	1000.3	1001.4	999.1	2.3	79	4.8	8.4	0	10.8	23
583	2017-08-05	29.4	33.2	27.1	6.1	1001.6	1002.7	999.8	2.9	92	5.5	8.4	40.8	0.8	17
584	2017-08-06	31.2	36.3	28.2	8.1	1001.2	1002.4	999.4	3	81	5.3	8.2	0	7.6	22
585	2017-08-07	32.1	36.5	28.3	8.2	1001.3	1002.7	998.9	3.8	77	4.2	6.1	0	9.7	23
586	2017-08-08	31.2	36.3	28.3	8	1000.4	1002.5	998.3	4.2	78	4.6	8.2	1.8	3.1	21
587	2017-08-09	28.4	31.3	24.7	6.6	999.3	1002.5	998.2	4.3	86	8.2	15.4	34.7	2.7	19
588	2017-08-10	29.6	33.6	27	6.6	1001.2	1002	999.7	2.3	77	3.6	6.3	0.1	10.5	24
589	2017-08-11	31.6	34.4	27	7.4	1004.6	1005.8	1002	3.8	70	3.8	6.6	0	10	16
590	2017-08-12	30.1	31.3	27.5	3.8	1006.1	1007.3	1005	2.3	81	3.7	7.5	0.3	0.7	25
591	2017-08-13	30.8	34.8	27.3	7.5	1004	1006.2	1002.8	3.4	79	4.4	8.8	11.3	7	21
592	2017-08-14	29	34.4	24.4	10	1003.6	1006.5	1002.1	4.4	87	9.1	15.4	42.7	8.3	22
593	2017-08-15	29.4	33	27	6	1004.7	1006.1	1003.5	2.6	80	4.1	7.9	0.7	7.4	25
594	2017-08-16	28.4	33.1	24.9	8.2	1006.1	1007.1	1004.1	3	80	4.8	9.7	2.3	9.7	19
595	2017-08-17	29.6	32.6	26	6.6	1007.8	1009	1006.5	2.5	77	3.5	6.5	0	7	25
596	2017-08-18	29	32.1	23.1	9	1009.2	1011.7	1008	3.7	78	5.3	11.4	45.3	11.2	24
597	2017-08-19	31.5	34.8	29.2	5.6	1007.2	1009.8	1004.8	5	76	3.8	7.3	0	11.8	22
598	2017-08-20	27.5	30.6	24.2	6.4	1005.3	1006.6	1003.9	2.7	87	5.1	9.1	32.2	0.6	23
599	2017-08-21	29.4	32.2	26.1	6.1	1005.1	1006.3	1004.2	2.1	84	4.1	6.4	0	7.6	18
600	2017-08-22	30.4	31.9	28.8	3.1	1007.1	1008.4	1005.5	2.9	83	5.6	9.7	1.5	10.5	24
601	2017-08-23	30.7	32.3	29.2	3.1	1008.6	1009.6	1007	2.6	80	5.7	10.5	0	10.5	23
602	2017-08-24	31.6	35.4	29.1	6.3	1008	1009.8	1006.1	3.7	72	4.8	9.8	0	11.6	19
603	2017-08-25	31	35.6	26.3	9.3	1008.2	1009.3	1006.8	2.5	81	5	8.8	4.2	6.5	27
604	2017-08-26	26.7	28.1	25	3.1	1011.8	1013.5	1009.4	4.1	81	6	11.4	1.6	0	27
605	2017-08-27	29.1	31.2	25.2	6	1011.9	1013.6	1010.4	3.2	82	5.2	8.8	0	8.9	18
606	2017-08-28	31.1	33.9	28.2	5.7	1010.2	1011.5	1008.3	3.2	73	3.9	7.5	0	12	17
607	2017-08-29	29.4	32.8	26.6	6.2	1011.6	1013.7	1009.7	4	84	6.1	10.5	0.3	4.8	23
608	2017-08-30	26	29	24.2	4.8	1012.2	1014	1010.7	3.3	68	5.6	9.7	0	3.8	14
609	2017-08-31	25.2	27.8	23.1	4.7	1011.8	1013.6	1010.9	2.7	68	4.9	8.2	0	0	30
610	2017-09-01	25.2	29.1	23.1	6	1010.8	1011.9	1009.5	2.4	68	4.3	7.7	0	8.8	26
611	2017-09-02	25.7	29.4	20.9	8.5	1009.8	1011.1	1008.9	2.2	76	6	10	1.2	5.8	24
612	2017-09-03	26.7	28.6	25.5	3.1	1011.2	1012.3	1010.1	2.2	70	6.1	10.1	0	3.1	20
613	2017-09-04	27.9	29.7	26.5	3.2	1010	1012	1008.5	3.5	72	5.8	9.9	0	10.3	20
614	2017-09-05	28.8	32	26.8	5.2	1008.4	1009.9	1006.2	3.7	80	4.3	8.3	0	10.5	12
615	2017-09-06	29	32.9	26.2	6.7	1006.8	1008.6	1004.8	3.8	84	3.2	5.8	0.6	4	20
616	2017-09-07	24.2	27	23.2	3.8	1009.1	1010.5	1006.9	3.6	94	3.2	6.3	16.4	0	12
617	2017-09-08	24.8	26.4	22.7	3.7	1011.5	1012.6	1010.3	2.3	87	4	7.1	0	0	19
618	2017-09-09	25.9	26.9	25.2	1.7	1010.4	1011.6	1008.9	2.7	85	5.5	9.1	0.5	0	16
619	2017-09-10	28.3	31.6	25.8	5.8	1008	1011.1	1005.6	5.5	87	3.9	7.3	0.6	7.7	18
620	2017-09-11	25.7	28.1	23.3	4.8	1008.4	1011.8	1005.2	6.6	94	3.9	7.2	12	0	19
621	2017-09-12	24.6	29.2	22.7	6.5	1015.1	1016.6	1011.7	4.9	84	4.3	7.6	0.2	7.9	18
622	2017-09-13	24.4	29.2	20.9	8.3	1016.6	1018.5	1015.7	2.8	74	5.7	10.5	0	10.5	21
623	2017-09-14	24.2	28.3	20.3	8	1013.3	1016.7	1011.3	5.4	72	5.9	12	0	5	13
624	2017-09-15	23.7	25.7	22.5	3.2	1010.7	1012.4	1009.7	2.7	93	5	10.5	2	0	14
625	2017-09-16	24.2	28.5	22.4	6.1	1010	1011.4	1008.1	3.3	71	4.5	9.5	0.6	6	22
626	2017-09-17	24.2	29	19.6	9.4	1010.1	1011.6	1009	2.6	68	4.1	8.7	0	10.4	13
627	2017-09-18	24.6	28.8	19.2	9.6	1010.9	1012.3	1009.3	3	75	3.6	6.3	0	10.7	11
628	2017-09-19	26.4	28.9	24	4.9	1010.4	1011.8	1008.9	2.9	74	4.3	7.6	0	5.4	14
629	2017-09-20	20.9	26.4	18.5	7.9	1012	1013	1010.2	2.8	90	6	10.1	26.8	0	8
630	2017-09-21	21	21.9	18.8	3.1	1011.9	1013.2	1010.7	2.5	98	5.6	9.9	4.7	0	12
631	2017-09-22	22.3	25.6	20.3	5.3	1012.6	1013.8	1011	2.8	88	2.1	3.5	0.5	0.1	13
632	2017-09-23	21.2	23	19.7	3.3	1015.1	1017.1	1013.3	3.8	91	6.1	9.8	3.7	0	17
633	2017-09-24	22.8	24.8	21	3.8	1012.3	1015.4	1010	5.4	97	4	8.4	4.9	0	21
634	2017-09-25	24.9	25.4	24.2	1.2	1008.8	1011	1007.3	3.7	98	3.9	7.5	22.7	0	19
635	2017-09-26	27.6	33.4	24.2	9.2	1007.8	1009.8	1006.2	3.6	91	3.9	8.5	1	4.8	11
636	2017-09-27	25	27.6	23.8	3.8	1008.8	1010.6	1006.7	3.9	88	5.7	11.3	11.1	1.1	12
637	2017-09-28	20.7	23.8	19	4.8	1013.8	1016.1	1010.6	5.5	88	3.3	7.2	2.9	0	11
638	2017-09-29	21.5	25.1	16	9.1	1017.7	1019.1	1015.8	3.3	79	4.3	7.4	0	3.6	25
639	2017-09-30	21.9	23.3	21	2.3	1017.9	1019.6	1016.5	3.1	94	5.2	10.5	42.9	0	18
640	2017-10-01	27	31.9	22.3	9.6	1011	1017.3	1008	9.3	84	4.9	9	0	6.1	27
641	2017-10-02	25.2	27.9	21.8	6.1	1011.1	1015.2	1008	7.2	91	3.5	6.9	2.1	0.7	18
642	2017-10-03	22.3	25.8	21.1	4.7	1018.8	1021.5	1015.2	6.3	71	4.6	9.1	0	1.2	24
643	2017-10-04	20.2	22.5	19.2	3.3	1022.2	1024	1021.1	2.9	70	4.1	8.2	0	0	18
644	2017-10-05	18.8	20.3	18.4	1.9	1019.1	1022	1017.3	4.7	80	3.2	6	0	0	20
645	2017-10-06	19.8	22.6	17.4	5.2	1018.5	1020	1017.1	2.9	80	3.1	5.9	0	4.3	19
646	2017-10-07	20.7	24.5	16.5	8	1019.4	1021	1017.8	3.2	80	3.8	6.5	0	8.9	27
647	2017-10-08	23.2	25.5	20.9	4.6	1019.6	1021.5	1018.2	3.3	83	5.3	7.9	0	9.5	22
648	2017-10-09	24.6	27.2	21.8	5.4	1018.5	1020.4	1016.5	3.9	91	4.8	8.3	0	6.9	34
649	2017-10-10	25.8	28.4	23.7	4.7	1016.6	1018	1015.2	2.8	94	3.8	6.8	0	6.4	20
650	2017-10-11	21.5	25.5	19.3	6.2	1018.2	1020.5	1015.2	5.3	97	3.9	8	29.6	0	11
651	2017-10-12	18.1	19.4	17	2.4	1019.9	1021	1019	2	87	4.1	9.3	0.3	0	26
652	2017-10-13	18.3	20.4	17	3.4	1020	1021.1	1018.8	2.3	73	4.6	9.3	0	0	18
653	2017-10-14	18.2	21.9	15.3	6.6	1020.1	1021.9	1018.3	3.6	78	6.8	12.9	2.9	0	15
654	2017-10-15	17.6	18.6	15.1	3.5	1018.8	1021.9	1017.5	4.4	96	5.8	11.7	28.6	0	12
655	2017-10-16	18.3	19.4	16.5	2.9	1019.2	1022.1	1017.2	4.9	98	5.7	12.8	31.3	0	17
656	2017-10-17	18.5	21.5	16.2	5.3	1021.5	1023.3	1020.6	2.7	84	4.5	9.1	2.5	0	15
657	2017-10-18	19.6	24.3	16.5	7.8	1019.3	1021.4	1017.7	3.7	83	3.4	6.5	0	1.7	20
658	2017-10-19	18.5	21.8	16.7	5.1	1018	1019.5	1016.4	3.1	79	3.5	6.7	0.2	0.9	16
659	2017-10-20	18.7	22.2	16.8	5.4	1017.8	1019.1	1016.3	2.8	74	3.8	7.7	0	0.7	18
660	2017-10-21	18	22.7	14.8	7.9	1016.8	1018.6	1015.4	3.2	74	4.6	10	0	9	16
661	2017-10-22	17.8	22.3	14.4	7.9	1014.6	1016.3	1012.7	3.6	75	5.5	9.7	0	8.5	19
662	2017-10-23	16.2	19.1	14	5.1	1019.7	1022.5	1015.3	7.2	76	3.4	6.6	0	2.5	14
663	2017-10-24	15.6	21.1	12	9.1	1025	1026.8	1022.4	4.4	67	3.5	6.6	0	9.8	28
664	2017-10-25	15.8	21	10	11	1024.8	1026.7	1022.8	3.9	78	3.6	6.9	0	9.4	16
665	2017-10-26	17.4	21.3	12.7	8.6	1020.1	1023.8	1018	5.8	77	3.2	6	0	9.1	16
666	2017-10-27	17	22.9	12.5	10.4	1018.3	1019.5	1016.8	2.7	81	2.8	5.2	0	7.3	20
667	2017-10-28	17.8	23	14.1	8.9	1018.4	1020.1	1016.8	3.3	73	4.3	8.6	0	8.8	17
668	2017-10-29	15.6	20.3	13.1	7.2	1024.5	1028.7	1019.9	8.8	81	5.8	10.4	0	0	25
669	2017-10-30	12.7	17.1	9.8	7.3	1029.4	1031.5	1028.1	3.4	60	4.9	8.4	0	8.3	17
670	2017-10-31	13.9	19	7.7	11.3	1025.8	1028.5	1023.3	5.2	69	3.2	5.1	0	9.8	10
671	2017-11-01	17.5	20.9	12.4	8.5	1020.6	1024.1	1018.9	5.2	67	3.1	5.8	0	9.7	13
672	2017-11-02	16.5	23.1	12.1	11	1017.8	1019.8	1016.3	3.5	90	3.3	4.9	0	8.8	21
673	2017-11-03	17.8	24.8	12.9	11.9	1022	1027	1017.8	9.2	75	4.9	9.9	0	5.9	12
674	2017-11-04	13.6	17.2	10.7	6.5	1031.3	1033.1	1027	6.1	56	4.7	9.1	0	9.1	19
675	2017-11-05	13.2	16.6	10.9	5.7	1028	1031.8	1025.7	6.1	64	3	5.4	0	0	12
676	2017-11-06	15.2	19.9	9.4	10.5	1021.9	1026.1	1019.6	6.5	92	2.7	4.4	0	3.2	12
677	2017-11-07	18.1	20.2	17.6	2.6	1020.2	1021.3	1018.6	2.7	87	2.5	4.4	0.4	0	13
678	2017-11-08	17.4	23.2	14.7	8.5	1022.5	1024	1020.6	3.4	70	3.8	7.1	0	5.9	8
679	2017-11-09	15.1	19.6	9.8	9.8	1022.4	1024.7	1020.2	4.5	81	5	7.8	0	9.5	12
680	2017-11-10	18	21.6	16.4	5.2	1018.3	1020.9	1016	4.9	72	4.3	8.7	0	1.5	11
681	2017-11-11	14.6	18.6	11.4	7.2	1022.8	1024.7	1020.9	3.8	60	3.9	7.3	0	7.2	14
682	2017-11-12	13.8	18.1	9.2	8.9	1020	1022.5	1018.2	4.3	75	3.9	6.9	0	5.1	27
683	2017-11-13	16.8	19.2	14.5	4.7	1017.2	1019.9	1015	4.9	81	3.9	6.6	5.3	6.2	16
684	2017-11-14	15.7	17.6	14.5	3.1	1019.2	1020.8	1017.2	3.6	93	2.6	4.9	5.8	0	14
685	2017-11-15	15.7	17.4	14.4	3	1021.2	1022.6	1020.2	2.4	85	4.2	7.2	1.8	0	13
686	2017-11-16	15	16.5	14.3	2.2	1019.8	1022.2	1017.8	4.4	93	5.4	9.3	14.3	0	6
687	2017-11-17	17.6	18.2	15.4	2.8	1012.7	1018	1010.3	7.7	99	6.1	9.5	19	0	14
688	2017-11-18	10.9	17.9	7.7	10.2	1024.2	1028.8	1012.1	16.7	72	6.5	14.9	19.1	0.6	12
689	2017-11-19	8.8	13.4	4.2	9.2	1027.7	1029.9	1025.5	4.4	66	4.1	7	0	5.6	21
690	2017-11-20	9.1	11.7	7.3	4.4	1028	1029.3	1026	3.3	76	3.4	7.8	1.9	0.2	13
691	2017-11-21	9.4	11.8	5.6	6.2	1024.5	1028.7	1021	7.7	88	2.8	5.4	1.4	0	16
692	2017-11-22	10.8	13.6	10	3.6	1021.8	1023.4	1020.2	3.2	87	4	8.9	16.8	0.5	8
693	2017-11-23	9.1	13.9	5.1	8.8	1026.3	1028.7	1023.5	5.2	60	3.1	6.2	0	8.6	17
694	2017-11-24	9.1	15.3	4.1	11.2	1027.9	1030.1	1026.6	3.5	60	3.1	4.8	0	7.1	12
695	2017-11-25	12.5	15.5	8.3	7.2	1026.1	1028.3	1024	4.3	56	3.4	6	0	2.9	12
696	2017-11-26	13.2	18.3	9.7	8.6	1024.8	1026.3	1023.4	2.9	66	3.6	7	0	5.5	16
697	2017-11-27	12.7	16.4	7.3	9.1	1023.8	1026.7	1021.2	5.5	86	5.8	10	0	7.3	16
698	2017-11-28	15.9	21	14.1	6.9	1021	1022.5	1018.8	3.7	78	4.2	7.6	0	3.6	10
699	2017-11-29	12.8	14.3	11.4	2.9	1024.4	1026.6	1022.4	4.2	93	4.1	7.6	19.8	0	12
700	2017-11-30	9.8	11.3	8.7	2.6	1027.6	1029.7	1024.8	4.9	75	4.4	10	3.3	0	12
701	2017-12-01	9.2	12.5	7.7	4.8	1029.8	1031.3	1028.7	2.6	65	4.1	6.8	0.1	3.8	8
702	2017-12-02	8.6	12.3	4	8.3	1026.6	1030.4	1024.2	6.2	80	2.2	4.4	0	0	15
703	2017-12-03	12.4	15.8	8.9	6.9	1023	1024.9	1020.9	4	79	2.2	3.6	0	0.9	10
704	2017-12-04	10.2	13.7	7.9	5.8	1025.4	1026.9	1022.3	4.6	77	4	7.6	0	0.7	12
705	2017-12-05	5.3	9.3	0.9	8.4	1027.9	1030.3	1026.2	4.1	58	4.2	8.5	0	8.2	11
706	2017-12-06	4.4	10.2	-0.8	11	1024.3	1026.5	1023	3.5	68	3.1	5.6	0	6.6	13
707	2017-12-07	7.2	12.3	2.1	10.2	1023.6	1025.7	1021.7	4	69	2.9	5.5	0	0	9
708	2017-12-08	5.9	9	3.9	5.1	1028.9	1031.1	1025.6	5.5	52	5.5	10.4	0	6.8	11
709	2017-12-09	5.1	9.3	-0.9	10.2	1023.3	1028.5	1019	9.5	57	3.6	5.7	0	6.9	18
710	2017-12-10	8.4	12.8	5.2	7.6	1020.5	1024.1	1016.9	7.2	49	6.2	10.7	0	7	16
711	2017-12-11	5.5	12.3	-0.3	12.6	1025.6	1027.5	1024.1	3.4	67	2.4	4.3	0	6.3	10
712	2017-12-12	6	11.6	1.9	9.7	1028.5	1030.6	1026.5	4.1	70	4.7	8.3	0	7.4	10
713	2017-12-13	7.3	12	3.2	8.8	1028.8	1030.2	1027.8	2.4	66	7.1	10.8	0	0	8
714	2017-12-14	8	9.3	6.8	2.5	1028	1030.1	1026.1	4	78	4.5	8	1.3	0	6
715	2017-12-15	8.2	9.2	7.3	1.9	1026.2	1028.3	1024.3	4	88	3	6.2	9.9	0	11
716	2017-12-16	5.5	7.4	3.2	4.2	1032.6	1036.4	1027.9	8.5	73	4.5	9.5	1.2	0	11
717	2017-12-17	1.6	5.7	-0.5	6.2	1035.1	1036.8	1032.9	3.9	53	4.3	7.7	0	7.7	18
718	2017-12-18	2.2	7.8	-3.5	11.3	1032.8	1034.7	1030.4	4.3	53	3.6	6.5	0	8.9	7
719	2017-12-19	4.4	10.9	0.7	10.2	1034.4	1035.5	1032.6	2.9	55	3.6	7.6	0	8.4	12
720	2017-12-20	4.8	11.7	-2.3	14	1033.6	1035.5	1031.5	4	65	4.3	7.9	0	7.9	10
721	2017-12-21	4.7	10.2	-0.8	11	1032	1034.4	1029.6	4.8	62	2.9	5.5	0	7.3	8
722	2017-12-22	7.7	12.2	2.4	9.8	1025.4	1030.3	1023.3	7	77	2.9	5.2	0	8.4	6
723	2017-12-23	11.9	15.2	7.2	8	1020.2	1023.8	1017.3	6.5	88	3.6	6.8	0	1.6	14
724	2017-12-24	10.2	14.2	7.8	6.4	1021.4	1025.7	1017.4	8.3	55	8.5	14.4	1.1	6.5	12
725	2017-12-25	5.6	10.5	1.6	8.9	1027	1028.9	1025.7	3.2	55	2.8	6.1	0	7.1	12
726	2017-12-26	4.9	10.7	0.6	10.1	1027.7	1029	1026.2	2.8	79	2.5	4.2	0	7.5	6
727	2017-12-27	6.2	11.3	1.7	9.6	1028.9	1030.7	1027	3.7	82	5.7	8.5	0	2.7	12
728	2017-12-28	9.9	10.4	9.1	1.3	1025.6	1027.8	1023.5	4.3	92	3.8	7.2	14.5	0	9
729	2017-12-29	11	12.7	9.5	3.2	1027.2	1029	1025.5	3.5	91	3.7	5.9	1.8	0	10
730	2017-12-30	9.9	11.3	8.5	2.8	1026.5	1028.1	1024.2	3.9	88	4.5	8	1.5	0	14
731	2017-12-31	6.1	10.2	3.4	6.8	1028.3	1030.3	1026.6	3.7	78	4.1	8.8	0	5.7	6
732	2018-01-01	4.2	10.7	-0.5	11.2	1027.5	1029.7	1025.7	4	77	3.2	5.8	0	7.7	12
733	2018-01-02	10.9	12.6	5.1	7.5	1025	1027.6	1022.8	4.8	78	4.5	8.2	0	0	11
734	2018-01-03	7.6	12	4.6	7.4	1028.4	1030.8	1024	6.8	95	6.3	11.6	9.8	0	5
735	2018-01-04	4.8	5.7	3.8	1.9	1025.5	1030.8	1021.7	9.1	96	4.4	7.4	25.2	0	4
736	2018-01-05	3.7	5.6	2.3	3.3	1025.1	1027.1	1021.6	5.5	88	4.5	8	5.8	0	11
737	2018-01-06	3.7	8.5	-0.3	8.8	1024.4	1028	1020.8	7.2	83	3.4	6.2	0	3.3	9
738	2018-01-07	7.6	10.6	4.6	6	1017.4	1022.2	1014.5	7.7	97	5.4	10.1	5.5	0	6
739	2018-01-08	3.2	4.7	2.4	2.3	1020.6	1023.4	1017.3	6.1	75	7.3	14.2	0	0	8
740	2018-01-09	1.1	6.5	-2.2	8.7	1025.3	1027	1023.2	3.8	59	8.2	15.4	0	8.9	11
741	2018-01-10	2.1	6	-1.4	7.4	1028.2	1030.3	1024.8	5.5	56	6.4	12.1	0	8.5	12
742	2018-01-11	-0.3	6.1	-6.6	12.7	1032.4	1034.7	1029.5	5.2	69	4.8	7.5	0	8.8	4
743	2018-01-12	-2.1	2.5	-5.4	7.9	1035.6	1038.1	1033.9	4.2	59	3.9	7.5	0	8.7	7
744	2018-01-13	-1.8	5.4	-8.9	14.3	1033.6	1036	1031	5	80	3.3	4.9	0	6.7	10
745	2018-01-14	5.8	11.8	0.4	11.4	1026.7	1032.7	1023.9	8.8	71	5.3	8.3	0	4.5	9
746	2018-01-15	6.5	16	-1.7	17.7	1022.8	1025.3	1020.7	4.6	88	4	6.9	0	9.3	10
747	2018-01-16	11.8	16.5	9.1	7.4	1015.9	1020.8	1013.2	7.6	88	5.2	8.9	0	1.3	15
748	2018-01-17	8.9	12.6	7.4	5.2	1019.6	1021.2	1015.4	5.8	86	3.5	6.3	0	1.3	13
749	2018-01-18	8	9.9	5.2	4.7	1023.5	1024.9	1021.2	3.7	82	3.2	5.3	0	0	11
750	2018-01-19	8	8.6	7.7	0.9	1024	1026.2	1022.2	4	85	2.8	4.9	0	0	13
751	2018-01-20	6.8	8.1	5.9	2.2	1022.9	1025.1	1021	4.1	92	2.5	4.1	4	0	10
752	2018-01-21	7	8.8	5.8	3	1020	1023.5	1017.4	6.1	91	4.1	7.9	6.5	0	9
753	2018-01-22	5.7	10.3	3.6	6.7	1020	1022.1	1017	5.1	91	4	6.4	7.7	3.9	7
754	2018-01-23	5.2	7.8	1.5	6.3	1023.6	1025.6	1020.2	5.4	82	5.2	8.9	0	0	13
755	2018-01-24	2.2	4.4	0.4	4	1028	1030	1025.6	4.4	66	4.6	8.3	0	0	7
756	2018-01-25	0.5	1.6	0.2	1.4	1028.4	1029.6	1026.2	3.4	97	5.1	9.8	9.1	0	8
757	2018-01-26	-0.2	1	-0.7	1.7	1031.9	1034	1029.2	4.8	84	4.9	9.7	5.7	0	16
758	2018-01-27	0.3	1.4	-0.9	2.3	1027.1	1032.1	1022.8	9.3	91	3.2	5.4	4.6	0	8
759	2018-01-28	1.5	2.6	0.3	2.3	1024.8	1027.5	1021.8	5.7	94	4.5	7.2	8.7	0	5
760	2018-01-29	-0.6	1.8	-2.1	3.9	1029.9	1031.5	1027.5	4	69	5.8	10.2	0	5.9	10
761	2018-01-30	-1.8	3.8	-6	9.8	1029.8	1031.8	1026.8	5	78	3.1	5.5	0	6.5	8
762	2018-01-31	0.5	2.4	-3.4	5.8	1029.7	1030.9	1027.7	3.2	76	3.9	7.3	0	0	9
763	2018-02-01	0.3	6.8	-5	11.8	1030.2	1031.4	1027.5	3.9	79	3.7	8	0	5.9	17
764	2018-02-02	1.9	7.8	-3.3	11.1	1031.3	1032.7	1030.1	2.6	74	4.7	8.3	0	6.5	12
765	2018-02-03	0.6	2.9	-1.5	4.4	1034.6	1036.6	1032.7	3.9	58	5.8	12.8	0	7.9	13
766	2018-02-04	-0.8	3.3	-4.8	8.1	1034.6	1036.4	1032.8	3.6	56	5.1	10.1	0	8.5	10
767	2018-02-05	-0.6	5.2	-5.3	10.5	1032.2	1034.6	1029.6	5	65	5	8.5	0	8.6	5
768	2018-02-06	-0.5	5.6	-5.8	11.4	1030.1	1032.2	1028.4	3.8	64	4.3	7.9	0	8.6	10
769	2018-02-07	-0.8	6.3	-7.6	13.9	1026.4	1029.9	1023.8	6.1	78	3.6	6.2	0	7.8	14
770	2018-02-08	1.4	7.8	-3.9	11.7	1024.9	1027.5	1022.3	5.2	73	3.3	5.9	0	8.1	12
771	2018-02-09	5.9	10.6	1.6	9	1020.6	1023.8	1018.2	5.6	76	4	6.8	0.6	0.5	14
772	2018-02-10	5.7	7.5	4	3.5	1024.7	1028.8	1020.8	8	72	5.6	10.5	0.4	0	8
773	2018-02-11	2.2	9.4	-4.3	13.7	1028.8	1030.9	1025.9	5	69	6	10.9	0	8.4	3
774	2018-02-12	3.2	8.9	-2.1	11	1030.1	1033	1027.6	5.4	38	7.3	12.3	0	9.2	11
775	2018-02-13	3.8	11.8	-5.4	17.2	1025.6	1029.6	1021.2	8.4	68	4.1	6.3	0	9.9	21
776	2018-02-14	9.7	17.3	-0.1	17.4	1017.6	1021.4	1014.7	6.7	64	3.3	5.5	0	6.1	7
777	2018-02-15	8	11.2	5.3	5.9	1020	1022.2	1015.5	6.7	84	4.5	8.4	0	0	11
778	2018-02-16	5	6.2	3.9	2.3	1020.6	1023.1	1018.1	5	91	3	4.8	6.1	0	13
779	2018-02-17	4.6	9.9	-1.5	11.4	1024.4	1026.3	1022.5	3.8	83	5.6	8.6	0	9.5	11
780	2018-02-18	8.6	12.1	5.6	6.5	1020	1023.8	1016.8	7	85	5.2	9.1	0.7	0	6
781	2018-02-19	6.9	8.2	5.2	3	1020.9	1022.5	1017.9	4.6	98	4.5	8.2	11.3	0	4
782	2018-02-20	5.9	7.9	4.3	3.6	1022.3	1023.6	1018.3	5.3	91	4.2	7.2	11.5	0	8
783	2018-02-21	5.2	7.8	2.9	4.9	1024.5	1026.8	1022.3	4.5	91	5.2	8.5	4.3	0	8
784	2018-02-22	5.4	8.7	3.9	4.8	1024.9	1026.5	1022.7	3.8	88	2.9	4.3	0	0	13
785	2018-02-23	5.6	12.9	-0.6	13.5	1024	1025.7	1021.8	3.9	80	4	6.6	0	8.1	12
786	2018-02-24	9.5	13.1	6.5	6.6	1022.6	1023.8	1021	2.8	81	5.2	8.1	0.1	2	6
787	2018-02-25	9.2	11.9	7.1	4.8	1025	1027.1	1023.4	3.7	86	5.4	9.6	13.4	0.8	11
788	2018-02-26	7.8	12.6	1.3	11.3	1025	1027.4	1022.9	4.5	79	3.3	6.4	0	9.4	7
789	2018-02-27	10.6	15	4.8	10.2	1018.6	1023.3	1014.9	8.4	77	5.8	10.6	0	8.9	15
790	2018-02-28	12.1	14.5	10.7	3.8	1009.7	1015.1	1004.4	10.7	88	9.7	16.7	3.1	0.4	8
791	2018-03-01	8.5	15.8	3.6	12.2	1017.2	1019.9	1013.4	6.5	81	5.5	9.9	0	3.8	11
792	2018-03-02	7.4	8.6	5.4	3.2	1017	1021	1013.7	7.3	86	5.3	9.8	3.8	0	4
793	2018-03-03	12.8	18.6	8.5	10.1	1010.9	1014.3	1008.3	6	92	4.6	7.7	15.2	1.2	14
794	2018-03-04	16.6	23.3	11.3	12	1006.6	1012.1	1002.7	9.4	87	5.2	9.4	0	8.9	17
795	2018-03-05	9.4	19.9	7.4	12.5	1019.4	1025.8	1003.2	22.6	74	6.7	12.2	17.7	0	10
796	2018-03-06	8.1	13.1	4	9.1	1027.9	1029.6	1025.8	3.8	70	5.3	7.8	0	6	10
797	2018-03-07	8.2	9.5	7.5	2	1022.6	1028.9	1018.2	10.7	94	4.2	7.1	4.6	0	3
798	2018-03-08	7.5	10.7	5.9	4.8	1025.5	1028.1	1020.7	7.4	77	6.6	11.9	0.2	1.1	17
799	2018-03-09	3.5	10.4	-0.6	11	1028.3	1030.5	1026.1	4.4	69	5.2	9	0	9	9
800	2018-03-10	7.6	15.5	-0.3	15.8	1024.8	1026.7	1023.1	3.6	70	3.1	5.8	0	10.1	14
801	2018-03-11	10.1	17.8	2.4	15.4	1023.3	1025.5	1021.8	3.7	77	4.2	6.7	0	9.6	16
802	2018-03-12	14.8	20.7	9.8	10.9	1019.1	1022.5	1016.9	5.6	68	3.8	6.2	0	9.6	14
803	2018-03-13	16.6	23	9.2	13.8	1016.4	1018.3	1014.4	3.9	78	4.8	8.4	0	10	15
804	2018-03-14	17.4	22.7	15.3	7.4	1014.8	1016.1	1013.4	2.7	85	4.9	8.2	0	3.5	11
805	2018-03-15	16.6	19.1	14.2	4.9	1012.9	1014.5	1011.2	3.3	94	4.9	8.9	1	0	15
806	2018-03-16	8.4	17.3	6.9	10.4	1023.4	1026.8	1013.7	13.1	82	6.2	10.8	5.2	0	10
807	2018-03-17	10.1	13.4	6.3	7.1	1024.3	1027.3	1021.2	6.1	79	6.6	10.7	0	3.5	13
808	2018-03-18	12.9	16	10.3	5.7	1015.3	1021.6	1012.6	9	82	5.3	9	2.4	0	13
809	2018-03-19	9.6	13.1	8.4	4.7	1016	1017.8	1013.9	3.9	90	5.1	8.2	4.1	0	10
810	2018-03-20	7.2	8.4	5.7	2.7	1017.6	1018.5	1016	2.5	89	5.6	9.9	6	0	3
811	2018-03-21	6.1	7.1	4.5	2.6	1020	1021.6	1017.8	3.8	87	6.4	11.5	2.3	0	8
812	2018-03-22	8.8	15.5	4.1	11.4	1018.3	1021.6	1016.1	5.5	78	4.3	7.6	0	8.5	10
813	2018-03-23	11.5	18.9	3.7	15.2	1019.4	1021.2	1017.5	3.7	78	3.5	6.1	0	9.2	7
814	2018-03-24	14.2	21.6	7.2	14.4	1021.2	1022.9	1020.1	2.8	71	3.5	5.6	0	8.7	14
815	2018-03-25	15.4	20.5	11.6	8.9	1022.6	1024.4	1021.3	3.1	78	4	6.4	0	6.1	20
816	2018-03-26	14.9	20.3	10.3	10	1020.8	1022.6	1018.6	4	81	4.1	6.9	0	5.7	10
817	2018-03-27	14.6	21.3	8.6	12.7	1018.4	1020.8	1016.3	4.5	85	4.1	6.4	0	9.9	10
818	2018-03-28	16.3	24.2	11.1	13.1	1015.8	1017.7	1013.8	3.9	79	4.8	7.1	0	10.4	13
819	2018-03-29	16.7	22.1	12	10.1	1016.8	1018.3	1014.9	3.4	84	3.9	6.3	0	9.3	14
820	2018-03-30	15.8	21.5	13.5	8	1020.4	1022.6	1018.3	4.3	92	4.7	7.2	0	7.1	20
821	2018-03-31	15.1	20.2	11.2	9	1018.2	1021.5	1015	6.5	83	4.6	7.9	0	8.9	11
822	2018-04-01	19.4	25.7	14.5	11.2	1013.6	1016.1	1011.8	4.3	75	4.3	6.8	0	10.6	13
823	2018-04-02	18.3	22.4	15.3	7.1	1012.3	1014	1010.9	3.1	85	3.7	6.1	0	0.4	14
824	2018-04-03	21.2	26.3	16.6	9.7	1012	1013.6	1010.4	3.2	78	5.2	8.5	0	10.6	10
825	2018-04-04	14.9	20.2	11.3	8.9	1015.2	1017.4	1011.6	5.8	90	5.8	9.8	0	0	10
826	2018-04-05	12.1	15.5	9.4	6.1	1014.9	1017.9	1011.4	6.5	90	5.8	10.9	7.9	0	11
827	2018-04-06	11.1	16	7.4	8.6	1021.7	1025.2	1013.5	11.7	67	6	11.5	8.3	4.5	16
828	2018-04-07	10.5	13.9	6.7	7.2	1025.6	1027.7	1023.6	4.1	40	7.7	14	0	10.9	9
829	2018-04-08	12.6	21.4	2.4	19	1018.9	1024.8	1014.3	10.5	63	5.7	10.4	0	11.3	15
830	2018-04-09	18.6	24.6	7.2	17.4	1016	1018.7	1013.4	5.3	50	5.5	8.9	0	11.6	16
831	2018-04-10	20.9	27.3	16.1	11.2	1010.2	1014.1	1006.8	7.3	61	4.9	7.7	0	11.7	16
832	2018-04-11	20.3	29.4	13.7	15.7	1011	1012.7	1008.2	4.5	68	5.1	9.6	0	8.9	12
833	2018-04-12	17	20.2	14	6.2	1014.6	1016.8	1012.2	4.6	70	5.4	9.5	1.3	1.2	13
834	2018-04-13	15.8	16.6	14.1	2.5	1013.3	1017.7	1009.2	8.5	85	6.3	11.1	2.5	0	17
835	2018-04-14	13.8	17.9	11.7	6.2	1013.2	1017.8	1007.5	10.3	90	6.9	13.1	4.5	0	14
836	2018-04-15	14	19.3	10.1	9.2	1019.4	1021.1	1017.8	3.3	70	4.2	7.7	0.2	9.6	15
837	2018-04-16	11.4	15.7	8.8	6.9	1021	1022.2	1019.6	2.6	77	3.3	5.7	0	0	14
838	2018-04-17	12.5	19.8	3.9	15.9	1020.2	1022.5	1018.3	4.2	66	3.9	6.1	0	11.5	13
839	2018-04-18	16.1	22.4	9.7	12.7	1017	1019.8	1014.7	5.1	75	3.8	5.8	0	11	16
840	2018-04-19	18.6	24.4	12.5	11.9	1015.5	1017.1	1014.5	2.6	67	4.4	7.3	0	11.7	14
841	2018-04-20	19.8	24.5	15.7	8.8	1015.6	1017.3	1014.2	3.1	74	6.8	11.8	0	10	14
842	2018-04-21	21	25.5	18	7.5	1012.8	1015.6	1010.9	4.7	79	5.5	11	0	7.2	16
843	2018-04-22	22.3	28.4	20	8.4	1009.6	1011.7	1007.2	4.5	85	4.1	6.9	1.2	1.7	27
844	2018-04-23	18.9	24.2	14.4	9.8	1008.1	1009.8	1005.9	3.9	95	4.6	8.4	33.4	0	17
845	2018-04-24	13.5	15	12.4	2.6	1014.7	1017.1	1009.8	7.3	88	5.8	12.4	1.1	0	16
846	2018-04-25	15.6	22.2	8.7	13.5	1015.8	1017.6	1014.1	3.5	76	4.6	8.4	0	8.3	12
847	2018-04-26	17.1	23.3	10.4	12.9	1015	1016.6	1013.3	3.3	68	3.2	4.7	0	8.2	17
848	2018-04-27	19.6	27.2	13.7	13.5	1017	1018.5	1014.8	3.7	69	3.4	5.7	0	9.3	14
849	2018-04-28	19.6	26.3	14.2	12.1	1016.6	1019.4	1013.9	5.5	74	4.1	6.2	0	9.9	17
850	2018-04-29	21.4	27	15.3	11.7	1010.7	1014.9	1007.6	7.3	72	4.3	6.9	0	10.4	18
851	2018-04-30	24.5	30.9	20.6	10.3	1010.5	1012.3	1008.6	3.7	78	3.8	6	0	5.7	12
852	2018-05-01	23.3	30	19.5	10.5	1009.2	1011.7	1007	4.7	86	3.2	6.2	1.4	2.9	15
853	2018-05-02	21.6	25.8	16.7	9.1	1012.4	1018.2	1007.5	10.7	82	6.1	11.4	5.7	3.4	24
854	2018-05-03	17.9	25.5	11.2	14.3	1018.7	1020.5	1016	4.5	61	5.1	9.6	0	10.3	15
855	2018-05-04	20.2	26.2	12	14.2	1017.7	1019.8	1015.7	4.1	64	4.6	7.8	0	11.5	14
856	2018-05-05	19.7	20.9	16.6	4.3	1013.4	1016.3	1009.8	6.5	74	4.9	8.7	9.5	0	16
857	2018-05-06	23.6	29.3	20.5	8.8	1005	1010	1002.8	7.2	84	5.1	9.3	2.3	0.2	14
858	2018-05-07	20.4	24.9	17.2	7.7	1006.4	1008.6	1002.4	6.2	84	5.5	9.9	3.5	0	14
859	2018-05-08	18.5	24.9	16.2	8.7	1011.7	1015.4	1007.9	7.5	85	4.4	7.9	8.2	5.9	18
860	2018-05-09	16.8	21.3	11.1	10.2	1019.9	1021.8	1015.4	6.4	76	4.8	8.1	0	11.9	23
861	2018-05-10	17	20.3	14.8	5.5	1021	1023.5	1018.6	4.9	72	5.9	10.4	0	10	13
862	2018-05-11	20.4	25.4	16	9.4	1014.1	1019.6	1010.6	9	72	5.7	9.9	0	11.2	12
863	2018-05-12	24.2	29.6	20.8	8.8	1008.8	1011.7	1006.9	4.8	79	3.1	5.5	0.1	1.2	16
864	2018-05-13	22.7	27.2	20	7.2	1009.8	1010.8	1008.3	2.5	88	3.8	6.3	0.1	7.2	25
865	2018-05-14	23.6	28.7	19	9.7	1008.3	1011.5	1005.8	5.7	84	4.9	8.1	0	11	13
866	2018-05-15	27.4	32.5	23.3	9.2	1004.5	1007.2	1002.7	4.5	78	4.3	8.2	0	10.6	19
867	2018-05-16	28.8	34.8	23.8	11	1002.4	1004.3	1001	3.3	74	5.1	8.3	0	12.2	22
868	2018-05-17	29.1	35.5	24.6	10.9	1002.8	1005.3	1001.3	4	70	6.3	15.7	1.8	9.2	14
869	2018-05-18	25.9	32.7	22.6	10.1	1006.1	1009.6	1003.7	5.9	89	9.5	16.6	38.6	2.3	13
870	2018-05-19	20.2	22.9	19.6	3.3	1009.6	1010.7	1008.4	2.3	97	4.9	9.1	13.1	0	10
871	2018-05-20	19	20.6	18.5	2.1	1011.4	1013.4	1009.1	4.3	95	4.5	8.4	8.5	0	16
872	2018-05-21	19.7	21.2	18.3	2.9	1012.6	1013.9	1011.6	2.3	96	4.3	7.8	0.1	0	11
873	2018-05-22	22.4	27	19.7	7.3	1010	1012.9	1007.8	5.1	90	5.6	10.4	0.8	1.2	17
874	2018-05-23	21.6	26.9	18.2	8.7	1013.2	1015.6	1011.2	4.4	59	4.7	10.3	0	10.6	14
875	2018-05-24	21.8	26.1	15.1	11	1010.2	1012.6	1008.1	4.5	52	5.5	9.7	0	8.8	10
876	2018-05-25	21.6	24.3	18.6	5.7	1003.8	1008.4	1000.8	7.6	89	5.2	9.7	4.5	0	14
877	2018-05-26	22.3	25.7	20.9	4.8	1006	1009.2	1001.6	7.6	94	5.7	9	33.3	0	23
878	2018-05-27	21.8	24.9	19.5	5.4	1009.6	1010.5	1008.2	2.3	92	2.8	4.6	0	0	13
879	2018-05-28	24.1	29.4	20.3	9.1	1009.4	1010.3	1008.2	2.1	84	3.4	4.8	0	5.1	26
880	2018-05-29	23.8	27.6	21.4	6.2	1010.5	1011.7	1009.2	2.5	89	3.1	5.2	0	0.3	18
881	2018-05-30	23.6	25.7	21.8	3.9	1010.7	1011.4	1009.6	1.8	90	2.7	4.1	0	0	15
882	2018-05-31	20.3	22.6	18.3	4.3	1013.6	1015.3	1010.5	4.8	90	4.6	8.7	14	0	9
883	2018-06-01	20.4	26.6	16.1	10.5	1015.4	1016.4	1014.3	2.1	82	4.6	7	0	10.4	22
884	2018-06-02	20.9	25.2	16	9.2	1014.4	1016.3	1012.3	4	77	3.7	5.9	0	7	19
885	2018-06-03	22	24.6	19.3	5.3	1011.6	1013.3	1010	3.3	78	4.2	6.9	0.4	0.4	19
886	2018-06-04	23.4	27.5	18.4	9.1	1010.2	1011.5	1008.6	2.9	80	3.5	5.5	0	6.8	16
887	2018-06-05	23.3	25.6	21.7	3.9	1010.9	1012	1009.8	2.2	82	4.2	7.5	1.3	0.2	16
888	2018-06-06	23.6	27.1	20	7.1	1011	1012.3	1009.6	2.7	76	4.5	7.6	0	9.8	13
889	2018-06-07	23.5	26.7	20.7	6	1010.3	1011.9	1008.8	3.1	84	4.5	7.6	0	6.7	17
890	2018-06-08	23	26.7	20.5	6.2	1008.3	1010.7	1006.8	3.9	89	4.4	6.6	0	0.3	18
891	2018-06-09	22.3	25.7	20.6	5.1	1003.8	1008.1	1001.3	6.8	87	4.5	7.6	4.2	0.2	14
892	2018-06-10	22.3	24.6	20.6	4	1002.5	1004.1	1000.9	3.2	88	3.3	6.7	2.8	0	24
893	2018-06-11	23.9	29.3	19.3	10	1001.8	1002.8	1000.5	2.3	79	5.4	9.9	0	8.8	25
894	2018-06-12	25.1	31.3	18.7	12.6	1003.5	1004.9	1001.5	3.4	74	3.6	6.2	0	9.7	19
895	2018-06-13	27.1	31.1	21.9	9.2	1002.1	1003.3	1000.4	2.9	66	6	9	0	9.4	16
896	2018-06-14	25.2	28.1	22.6	5.5	1002.3	1003.2	1001.1	2.1	78	5.3	10.4	0	12.4	21
897	2018-06-15	24.6	27.9	19.8	8.1	1005.5	1007.6	1002.6	5	76	4.9	8.2	0	12.3	22
898	2018-06-16	23	26.3	20.8	5.5	1009.2	1010.6	1007.4	3.2	76	4.8	8.9	0	8.5	21
899	2018-06-17	24.4	27.3	20.9	6.4	1007.2	1009.7	1005.3	4.4	83	5.5	9.5	0	6.2	23
900	2018-06-18	25.9	29.4	23.3	6.1	1003.6	1006.2	1002.1	4.1	85	5.1	8.2	0	10.2	28
901	2018-06-19	28.5	33.1	24.8	8.3	1000	1003.1	998.3	4.8	80	5.3	7.9	4.8	5.2	24
902	2018-06-20	22.2	26.7	20.6	6.1	1004.1	1006.4	1000.9	5.5	96	4	7.3	13.5	0	15
903	2018-06-21	23.3	28	20.1	7.9	1007.9	1009.3	1006.2	3.1	85	4.3	7	0	11.4	17
904	2018-06-22	21.5	24	19.7	4.3	1007.3	1009.4	1006.1	3.3	93	5.2	10.7	11.1	0	16
905	2018-06-23	20.7	24.5	18	6.5	1006.6	1007.9	1004.5	3.4	92	4.3	8.1	56.1	0.3	18
906	2018-06-24	23.3	24.5	21.3	3.2	1008.2	1009	1006.8	2.2	94	4.1	7.1	2.3	0	18
907	2018-06-25	27.8	32.9	23.5	9.4	1007.4	1009.4	1006	3.4	86	4	6.2	0.2	10.5	17
908	2018-06-26	30.5	35.8	25.5	10.3	1006.1	1007.3	1005.4	1.9	77	4.9	7.2	0	10.9	12
909	2018-06-27	31.8	36.3	28.4	7.9	1004.5	1006.6	1002.9	3.7	69	4.9	7.9	0	11.2	14
910	2018-06-28	30.5	35	27	8	1001	1003.9	999.8	4.1	74	5.6	9.2	1.6	5.2	17
911	2018-06-29	26.4	29.3	24.9	4.4	1001.8	1003.4	1000.2	3.2	91	4.5	7.4	1	4.2	12
912	2018-06-30	26	27.3	23.6	3.7	1003.1	1006.4	1001.7	4.7	94	3.7	6.5	14.4	0.4	17
913	2018-07-01	26.3	28.8	24.5	4.3	1003.5	1004.8	1002.1	2.7	94	4.5	9.2	6.4	0.1	22
914	2018-07-02	27.8	30.6	25.5	5.1	1001.4	1003.3	999.2	4.1	87	4.8	8	0	6.5	15
915	2018-07-03	26.6	30.4	25.3	5.1	998.6	1000.9	997	3.9	93	3.6	6	2	1.8	28
916	2018-07-04	27.8	31.4	25.5	5.9	998.7	1000.3	997	3.3	91	4.9	8.1	7.1	2.6	13
917	2018-07-05	26.5	28.6	25.8	2.8	999	1000.4	997.3	3.1	98	3.8	6.5	29.8	0	22
918	2018-07-06	27.2	29.8	25	4.8	1000.3	1001.5	999.2	2.3	92	4.8	8.5	0	0	15
919	2018-07-07	26.6	28.9	25.4	3.5	1003.2	1004.4	1001.5	2.9	96	4.4	7.7	8.5	0	17
920	2018-07-08	29.2	32.8	26.1	6.7	1004.7	1005.8	1003.6	2.2	86	4.7	8	0	8.4	32
921	2018-07-09	29.8	32.6	27.3	5.3	1007.2	1008.5	1005.8	2.7	78	6.1	9.1	0	11.8	25
922	2018-07-10	28.8	31.7	26.8	4.9	1009	1010	1007.9	2.1	82	5.8	9.9	0	11	20
923	2018-07-11	28.4	30.8	27.2	3.6	1007.7	1009.3	1006.6	2.7	84	8.9	15.4	0	5.2	13
924	2018-07-12	29	31.5	27.1	4.4	1008	1008.9	1007.2	1.7	82	7.1	13	0	11.1	29
925	2018-07-13	29	32.2	26.9	5.3	1009	1010.2	1007.6	2.6	80	6.5	10.5	0	12.3	14
926	2018-07-14	28.9	31.7	26.5	5.2	1008.4	1009.6	1007.2	2.4	74	6.4	10.6	0	12.6	22
927	2018-07-15	28.9	31.6	26.5	5.1	1009	1010.3	1007.6	2.7	75	6.1	10.2	0	11.6	23
928	2018-07-16	28.8	31.5	26.6	4.9	1009.2	1010.2	1008.1	2.1	78	6.7	11.2	0	12.3	14
929	2018-07-17	29.1	32.1	26.7	5.4	1009	1009.8	1007.7	2.1	82	6	10.2	0	11.9	17
930	2018-07-18	28.7	31.9	26.3	5.6	1008.3	1009.8	1007.4	2.4	79	6.2	10.2	0	11.8	17
931	2018-07-19	29	32.1	26.6	5.5	1008	1009.9	1007	2.9	78	5.6	10.5	0	12.1	15
932	2018-07-20	28.9	32.1	26	6.1	1006.6	1008.1	1005.4	2.7	76	5.7	9	0	11.5	18
933	2018-07-21	29.2	33.8	25.9	7.9	1004.3	1006.9	1002.7	4.2	81	5.3	8.7	3.8	6.8	22
934	2018-07-22	27.6	29.9	25.8	4.1	996.2	1003.2	993	10.2	88	7.5	13	15.1	0	17
935	2018-07-23	28.4	32.1	24.9	7.2	1001.6	1002.9	997.5	5.4	86	5.9	10.2	6.2	8.2	25
936	2018-07-24	29.4	33.8	24.9	8.9	1003.1	1004.3	1001.4	2.9	88	3.2	5.9	0.5	3.6	17
937	2018-07-25	31.3	36.9	27.2	9.7	1004.7	1005.9	1003.2	2.7	79	3.1	5.5	0	10.6	14
938	2018-07-26	28.9	35.8	26.5	9.3	1005.1	1006.2	1004.2	2	90	5	8.6	2.4	4.6	22
939	2018-07-27	29.6	35.1	25	10.1	1006.4	1007.5	1003.9	3.6	80	3	5.1	0	11.6	19
940	2018-07-28	30.8	35.9	27.2	8.7	1005.8	1007.1	1003.8	3.3	81	4	7	0	9.2	18
941	2018-07-29	30.4	34.7	26	8.7	1004.3	1006.3	1002	4.3	82	2.7	4.6	0	8.1	30
942	2018-07-30	30.1	35.5	25.9	9.6	1003.4	1004.8	1001.5	3.3	82	6	13.9	4.9	7.2	25
943	2018-07-31	29.4	34.8	25.4	9.4	1003.8	1005.2	1002.1	3.1	80	4.9	8.7	0	8.2	19
944	2018-08-01	29.4	34.2	25.1	9.1	1003.5	1005.1	1001.8	3.3	79	3.5	6.6	0	4.9	16
945	2018-08-02	29.3	34.2	25.6	8.6	1002.2	1004.1	1000.4	3.7	80	5	9.7	0	5.7	9
946	2018-08-03	26.3	29.8	25.5	4.3	996.2	1001.5	989.2	12.3	97	10.1	21.4	89.1	0	18
947	2018-08-04	30.2	33.6	26.4	7.2	1003.4	1004.8	1000.5	4.3	81	5.8	10.7	0	10.7	16
948	2018-08-05	30.6	33.5	28	5.5	1005.4	1006.6	1004	2.6	79	4.1	6.6	0	11.1	30
949	2018-08-06	30.8	34.3	28	6.3	1005	1006.1	1003.3	2.8	84	4.7	7.5	0	8.6	18
950	2018-08-07	30.2	33.5	27.7	5.8	1005.4	1006.6	1004.1	2.5	80	4.7	7.8	0	11.6	23
951	2018-08-08	29.9	33.7	25.1	8.6	1006.1	1007.2	1004.8	2.4	79	3.9	6.2	0	11.8	15
952	2018-08-09	29.4	33	25.4	7.6	1005.8	1007.1	1003.9	3.2	78	3.3	5.8	0	11.3	11
953	2018-08-10	29.8	34.3	24.6	9.7	1004.3	1006	1002.6	3.4	80	3.7	5.6	0	11	23
954	2018-08-11	29.4	35.2	25.6	9.6	1002.1	1003.7	1000.2	3.5	82	4.1	7.8	0	7.5	21
955	2018-08-12	27.3	28.4	25.3	3.1	999.8	1002.1	998.1	4	95	5.3	9.6	18.9	0	20
956	2018-08-13	29.4	32.3	25.6	6.7	999.9	1003.1	996.5	6.6	86	7.8	14.4	25.1	7.6	26
957	2018-08-14	29.6	31.7	28.2	3.5	1004.2	1005.1	1003.1	2	84	6.3	12.8	0.5	10	31
958	2018-08-15	28.8	32.5	26.5	6	1003.5	1005.2	1001.6	3.6	90	4.1	9.6	3.1	8	28
959	2018-08-16	27.6	31.9	26.3	5.6	998.9	1002.7	995.8	6.9	91	6.8	11.6	9.2	4.4	20
960	2018-08-17	27.8	30.2	25.9	4.3	993.4	999.5	986.1	13.4	92	8	14.3	32.7	0	9
961	2018-08-18	29.2	31.3	27.8	3.5	1003	1004.1	999.5	4.6	84	7.3	12.4	0	9.9	27
962	2018-08-19	29.1	31.6	28	3.6	1004.2	1005.6	1002.8	2.8	82	6.9	12.1	0	9.6	16
963	2018-08-20	30.2	33	28.2	4.8	1002.1	1004.1	1000	4.1	80	5.5	11.7	0	11	18
964	2018-08-21	28.4	31.3	26.9	4.4	1001.2	1002.1	1000.2	1.9	92	4	6.5	0	0.6	21
965	2018-08-22	29.1	33.9	25.2	8.7	1000.8	1002.5	998.9	3.6	80	4.7	8.3	0	11.2	19
966	2018-08-23	28	32	25.3	6.7	1000.9	1002.5	999.6	2.9	76	5.3	11	0	10.7	22
967	2018-08-24	27.5	32.5	22.2	10.3	1004.4	1005.7	1002.5	3.2	70	3.1	5.3	0	8.9	20
968	2018-08-25	26.4	27.2	25.6	1.6	1005.6	1006.7	1004.6	2.1	95	4.1	7.5	5	0	16
969	2018-08-26	27	30.7	25.7	5	1004.4	1006	1002.6	3.4	96	4.4	7.9	1.6	0	25
970	2018-08-27	29.5	32	27.3	4.7	1006.8	1008.2	1005.5	2.7	83	6.6	10.2	0	10.4	13
971	2018-08-28	29.3	31.9	27.6	4.3	1007.9	1008.9	1006.9	2	80	6.5	11.5	0	11.3	17
972	2018-08-29	29.4	31.4	26.8	4.6	1006.8	1008.5	1005.4	3.1	78	5.4	9.9	0	10.7	21
973	2018-08-30	29.9	33.2	27	6.2	1007.4	1008.8	1006.1	2.7	76	5.8	9.6	0	11.8	14
974	2018-08-31	30	33.6	26.7	6.9	1008	1009.7	1006.2	3.5	74	4.9	8.4	0	11.3	18
975	2018-09-01	28.1	32.1	25.1	7	1007.5	1009.2	1005.7	3.5	87	6.2	9.3	0.1	3.2	14
976	2018-09-02	28.2	33.1	26.3	6.8	1005.4	1007.5	1003.5	4	92	3.9	6.7	0.9	5	22
977	2018-09-03	29.1	33.2	26.2	7	1002.3	1005.3	999.6	5.7	89	4.6	8.8	12.9	5	16
978	2018-09-04	27.8	32.1	23.7	8.4	1002.7	1005.2	1000.3	4.9	78	4.7	10.2	0	10.3	13
979	2018-09-05	26.8	32.8	20.6	12.2	1006.2	1007.7	1004.9	2.8	75	3	5.3	0	10	15
980	2018-09-06	29.4	32.6	25.8	6.8	1005.3	1007	1003.4	3.6	77	3	6.1	0	6.7	15
981	2018-09-07	23.4	29.3	22.2	7.1	1009.2	1011.7	1005.3	6.4	92	4.7	8.3	19.7	0	14
982	2018-09-08	22.3	25.9	21.2	4.7	1013.4	1014.8	1011.5	3.3	92	2	3.2	4.9	0.3	15
983	2018-09-09	23.2	29.2	18.4	10.8	1016.3	1017.8	1014.7	3.1	77	4	7.6	0	9	30
984	2018-09-10	22.1	27.8	17.1	10.7	1017.6	1019.2	1016	3.2	80	3.8	6.5	0	4.3	14
985	2018-09-11	23.5	26.6	20.5	6.1	1015.3	1017.6	1013.9	3.7	83	4.4	8.4	0	0	17
986	2018-09-12	23.2	28.1	21.8	6.3	1013.3	1014.9	1011.7	3.2	96	2.5	4.8	3.9	1.4	13
987	2018-09-13	25.5	29.9	22.4	7.5	1012.7	1013.8	1011.5	2.3	90	4.1	6.6	0	0.8	18
988	2018-09-14	26.3	30.9	22.1	8.8	1013.6	1014.8	1012.1	2.7	84	2.5	4.4	0	6.2	14
989	2018-09-15	26.6	30.7	22.7	8	1014	1015.5	1012.5	3	86	3.9	6.5	0	10.3	17
990	2018-09-16	28.2	32.2	25.2	7	1013.2	1014.6	1012	2.6	87	4.8	7.8	0	6.5	15
991	2018-09-17	24.5	28.2	23.2	5	1015.1	1016.9	1013	3.9	99	5.6	8.7	77.7	1	17
992	2018-09-18	26.8	31.8	23.8	8	1015.4	1017.1	1013.5	3.6	91	2.8	4.5	0	4.1	14
993	2018-09-19	29.2	33.6	25.5	8.1	1011.6	1015	1009.3	5.7	85	3.4	6.1	0	9.2	11
994	2018-09-20	28.1	33.9	24.4	9.5	1008.8	1010.6	1006.9	3.7	87	5.1	9	3.4	6.4	13
995	2018-09-21	24.9	26.3	23.4	2.9	1012	1015	1009.2	5.8	91	4.2	6.9	3.3	0	18
996	2018-09-22	23.3	25.1	22.6	2.5	1015.8	1017.5	1014.5	3	96	2.3	4	4.6	0	19
997	2018-09-23	24.6	28.2	22.1	6.1	1016.2	1017.7	1014.7	3	84	3.8	5.4	0	2.1	32
998	2018-09-24	23.2	28	19.2	8.8	1017.4	1018.6	1016.2	2.4	74	5	9.4	0	10.2	18
999	2018-09-25	21.8	26.1	15.9	10.2	1016.6	1018.6	1014.8	3.8	72	5.1	8.9	0	7.7	19
1000	2018-09-26	22	26.2	16.4	9.8	1015.4	1017.6	1013.6	4	71	3.9	7.3	0	3.2	22
1001	2018-09-27	21.6	27.6	18.6	9	1015.2	1016.3	1013.8	2.5	82	4.9	9.4	1	6.2	15
1002	2018-09-28	22	28.6	16	12.6	1014.8	1016.6	1012.9	3.7	76	3.2	6.2	0	8.6	17
1003	2018-09-29	21.8	27.3	17.7	9.6	1011.6	1014.7	1009.7	5	77	5.7	10	0	9.2	17
1004	2018-09-30	21.6	28	17.5	10.5	1011.4	1013	1010	3	78	5.3	10.8	0	9.7	16
1005	2018-10-01	19.7	25.3	16.3	9	1017	1018.9	1012.1	6.8	66	5.5	11.4	0	10.3	18
1006	2018-10-02	18.8	26.2	12.9	13.3	1019.5	1020.9	1018.1	2.8	72	3	6.4	0	8.8	15
1007	2018-10-03	19.6	26.7	13.2	13.5	1020.7	1022.1	1019.1	3	72	3.7	7.1	0	9.4	17
1008	2018-10-04	20.2	26.2	14.2	12	1019.1	1021.8	1017.2	4.6	71	5.7	10.5	0	10.8	11
1009	2018-10-05	20.5	22.4	17	5.4	1011.1	1018	1007.9	10.1	79	8.4	15	0.1	0	12
1010	2018-10-06	20.5	25.9	16.5	9.4	1015.2	1017.8	1010.2	7.6	70	6.2	11.9	0	9.8	22
1011	2018-10-07	19.8	26.5	12	14.5	1018.8	1020.4	1017.1	3.3	82	3.1	7.5	0	9.2	25
1012	2018-10-08	20.2	25.3	15.3	10	1018	1019.8	1016.4	3.4	79	4.7	8	0	9.4	18
1013	2018-10-09	20.2	25	17.8	7.2	1015.9	1018	1014.3	3.7	83	3.6	6.2	0.3	1	14
1014	2018-10-10	17.5	19.8	15.6	4.2	1020.7	1023	1016.5	6.5	74	4.5	8	1.2	0	6
1015	2018-10-11	15.6	21.4	11.8	9.6	1025.4	1026.7	1023	3.7	63	4.6	8.2	0	8.5	17
1016	2018-10-12	15.5	22.4	10	12.4	1025.8	1027.2	1024.1	3.1	67	3.8	6.6	0	7.2	17
1017	2018-10-13	17.6	23.2	11.2	12	1023.5	1025.1	1021.7	3.4	66	3.5	6.3	0	6.5	16
1018	2018-10-14	17.6	20.6	14.8	5.8	1021	1022.7	1019.5	3.2	76	3.9	7.2	0	0	18
1019	2018-10-15	17.8	22.5	13.2	9.3	1019.1	1021.5	1016.8	4.7	77	3.8	7.6	1.2	2.9	13
1020	2018-10-16	15.5	19.5	14.1	5.4	1017.5	1018.8	1016.1	2.7	93	3.3	6	12.2	0	11
1021	2018-10-17	15.8	22.6	11.3	11.3	1018	1018.9	1016.6	2.3	83	3.3	6.4	0	6.5	16
1022	2018-10-18	15.6	21.2	11.2	10	1021.6	1023.9	1018.3	5.6	76	4.2	6.8	0	8	11
1023	2018-10-19	13.7	21.3	8.2	13.1	1025	1026.7	1023.4	3.3	78	3.5	6	0	8.5	14
1024	2018-10-20	16.6	21	11.1	9.9	1024.2	1026	1022.6	3.4	79	3.2	5.2	0	0.4	14
1025	2018-10-21	17.4	21.5	14	7.5	1021.2	1024.1	1019.3	4.8	85	4.3	8.1	0.6	0	14
1026	2018-10-22	17.4	19.2	15.8	3.4	1017.9	1020.7	1016.5	4.2	97	3	6.2	7	0	14
1027	2018-10-23	17.7	22.7	14.2	8.5	1020.1	1021.9	1018.5	3.4	85	3.9	6.7	0	3.7	7
1028	2018-10-24	16.5	23.3	11.1	12.2	1020.5	1022	1019.3	2.7	84	4.1	6.6	0	8.3	9
1029	2018-10-25	19.3	22.3	14.5	7.8	1017.8	1020.8	1015.2	5.6	78	5.5	9.4	0	5.6	18
1030	2018-10-26	19.4	22.9	16.7	6.2	1017.3	1020.2	1014.6	5.6	78	6.4	10.8	0	4.3	10
1031	2018-10-27	13.8	20.4	7.1	13.3	1022.7	1025.1	1020.2	4.9	58	4.7	7.6	0	8.1	13
1032	2018-10-28	14	24.1	7.1	17	1017.9	1021.9	1014.2	7.7	70	5	8.4	0	9.7	16
1033	2018-10-29	15.5	25	8.2	16.8	1016.6	1018.1	1015	3.1	68	5.1	10.4	0	9.4	18
1034	2018-10-30	15.7	23.3	9.1	14.2	1021.4	1023	1018.2	4.8	85	3.1	7.6	0	6.5	17
1035	2018-10-31	16.4	21.2	13.5	7.7	1024.5	1025.9	1022.9	3	68	3.4	5.7	0	3.3	10
1036	2018-11-01	13.3	19.6	6.4	13.2	1026.8	1028.3	1025.6	2.7	70	4.2	7.8	0	9.4	17
1037	2018-11-02	14	19.9	7.5	12.4	1025.9	1028.1	1024.2	3.9	74	4.2	7.5	0	3.5	11
1038	2018-11-03	16.1	19.7	13.9	5.8	1022.5	1025.3	1021	4.3	90	3.6	5.7	2.5	1.5	15
1039	2018-11-04	17.2	23.7	11.2	12.5	1020.7	1022.3	1018.9	3.4	87	3.7	6.5	0	3.8	17
1040	2018-11-05	18.9	21.4	16.1	5.3	1020.9	1022.4	1019.1	3.3	89	3.5	6	0.1	0	14
1041	2018-11-06	17.5	19.2	16.6	2.6	1021.9	1023.6	1020.6	3	92	3.9	7.2	2.4	0	10
1042	2018-11-07	16.6	17.8	14.9	2.9	1020.4	1021.7	1019.1	2.6	98	4.3	7.3	34.8	0	11
1043	2018-11-08	12	14.9	9.9	5	1019.6	1021.7	1017.3	4.4	94	5.2	9.8	12.6	0	9
1044	2018-11-09	10.8	17.8	5.5	12.3	1023.2	1025.1	1021.7	3.4	86	3.6	6.1	0	9.3	17
1045	2018-11-10	12.7	19.4	5.6	13.8	1023.5	1025.6	1021.6	4	86	4.9	8	0	8.9	12
1046	2018-11-11	16.9	20.6	14.7	5.9	1019.4	1022.3	1017.9	4.4	85	5.1	9.9	0	0.7	13
1047	2018-11-12	14.4	16	13.9	2.1	1020	1021	1019	2	92	4.1	8.4	6.2	0	13
1048	2018-11-13	13.5	18.8	10.7	8.1	1021.2	1022.5	1019.4	3.1	77	3.1	5.6	0	6	16
1049	2018-11-14	13.1	18.7	6.7	12	1021.7	1023.3	1020.3	3	81	3.4	5.9	0	3.6	13
1050	2018-11-15	14.4	16.8	11.2	5.6	1020.2	1022.3	1018.4	3.9	93	2.2	3.8	3.8	0	16
1051	2018-11-16	13.7	14.9	13.1	1.8	1020.9	1023.5	1018.9	4.6	92	5.3	9.8	0.1	0	13
1052	2018-11-17	13.8	16	12.9	3.1	1023.3	1024.5	1021.8	2.7	78	4.2	7.2	0	0	18
1053	2018-11-18	11.4	13.4	10.7	2.7	1021.2	1023	1018.7	4.3	99	3.9	6.9	17.8	0	10
1054	2018-11-19	11	14.3	9.5	4.8	1024.6	1026.4	1022.1	4.3	86	4.1	7.4	0.9	2.6	11
1055	2018-11-20	12.9	18.5	7.7	10.8	1023.2	1026.1	1019.5	6.6	87	5.3	8.3	0	6.2	22
1056	2018-11-21	13.8	16.7	13.1	3.6	1019.4	1021.2	1017.7	3.5	98	5	10.2	26.3	0	9
1057	2018-11-22	10.8	15.2	6.2	9	1027.4	1029	1021.1	7.9	80	5.1	9.9	0.2	7.4	9
1058	2018-11-23	9.6	15.9	3.8	12.1	1025.6	1029.2	1022.5	6.7	86	3.8	6.4	0	8.5	15
1059	2018-11-24	13	19.5	8.3	11.2	1023.6	1024.7	1022.4	2.3	79	3.7	6.3	0	8.8	13
1060	2018-11-25	11.6	19.6	6.1	13.5	1022.6	1024.6	1020.4	4.2	88	3	5.1	0	4.6	14
1061	2018-11-26	14.5	21.6	9.9	11.7	1022	1023.4	1020.6	2.8	89	2.8	5.3	0	3.6	11
1062	2018-11-27	12.4	17.6	7.7	9.9	1023.4	1025.1	1022	3.1	92	2.4	4.1	0	3.5	21
1063	2018-11-28	10.8	15.4	8	7.4	1023	1024.5	1021.9	2.6	94	2.7	4.5	0	3.5	16
1064	2018-11-29	11.2	19	4.8	14.2	1024.8	1026.8	1023.6	3.2	86	2.4	4.3	0	7.9	11
1065	2018-11-30	13.6	19.1	8.2	10.9	1024	1025.8	1022	3.8	90	4.4	7.9	0	7.1	18
1066	2018-12-01	15.4	22.6	9.7	12.9	1021	1022.6	1019.2	3.4	85	3.1	4.7	0	7.9	15
1067	2018-12-02	17.2	21.6	13	8.6	1017.2	1021.6	1015	6.6	99	5.5	9.4	11.4	3.1	17
1068	2018-12-03	17.3	21	16.1	4.9	1016.4	1018.4	1014.8	3.6	98	3.4	5.8	1.4	1.3	8
1069	2018-12-04	14.1	17.3	10.6	6.7	1021	1026.3	1014.3	12	97	5	9.5	8.1	0	9
1070	2018-12-05	11.2	13.1	9.6	3.5	1023.8	1027.4	1019.5	7.9	86	4.8	8.4	7	0	6
1071	2018-12-06	10	13.9	7.8	6.1	1023.4	1028.2	1017.3	10.9	96	4.5	8.3	25.9	0	9
1072	2018-12-07	3.9	7.8	0.5	7.3	1033.3	1036.1	1028.2	7.9	92	6	11	10.3	0	12
1073	2018-12-08	1.8	2.9	0.4	2.5	1035.7	1037.4	1034.4	3	83	5.7	10	2.5	0	11
1074	2018-12-09	2.3	5	-0.2	5.2	1033	1036.9	1030.2	6.7	96	4	7.7	3.2	0	10
1075	2018-12-10	8.1	9.7	5	4.7	1027.2	1030.9	1025.1	5.8	98	4.8	9.1	14.7	0	10
1076	2018-12-11	7.9	9.8	6	3.8	1027.6	1031.4	1024.3	7.1	97	5.6	10.6	14.7	0	13
1077	2018-12-12	3.9	7.3	1.1	6.2	1033.4	1035.3	1031.3	4	80	5.8	10.6	0	4.7	7
1078	2018-12-13	2.7	5.6	-0.6	6.2	1033.5	1035.2	1032.3	2.9	74	4	6.4	0	0	10
1079	2018-12-14	4.4	10.6	-2.2	12.8	1034.8	1036.5	1033.1	3.4	77	3.8	6	0	0	16
1080	2018-12-15	8.5	10.4	7	3.4	1029.7	1035	1026.6	8.4	84	3.1	7.4	3.5	0	9
1081	2018-12-16	6.9	9.6	4.7	4.9	1024.7	1027.2	1022.9	4.3	81	7.1	12.7	7	2.8	13
1082	2018-12-17	5.4	13.4	-0.3	13.7	1025.2	1027.1	1023.8	3.3	78	4.6	7.6	0	7.9	12
1083	2018-12-18	5.8	15.9	-1.1	17	1024	1026.3	1022.4	3.9	82	3.4	5	0	8.4	14
1084	2018-12-19	9	16	3.5	12.5	1020	1022.9	1017.7	5.2	80	2.1	3.7	0	0	14
1085	2018-12-20	10.6	13.2	8.8	4.4	1019.6	1020.9	1017.9	3	95	3.2	5.5	1.2	0	14
1086	2018-12-21	10.4	14.9	3.8	11.1	1021	1022.8	1019.5	3.3	95	2.7	4.2	0	0	14
1087	2018-12-22	12.8	13.8	12.3	1.5	1020.5	1021.7	1018.9	2.8	100	3.7	6.2	19.7	0	9
1088	2018-12-23	9.5	12.9	5.2	7.7	1027.3	1030	1021.3	8.7	81	5.2	9.5	0.3	4.8	12
1089	2018-12-24	7.9	12.7	2.2	10.5	1027.2	1030.7	1024.3	6.4	80	3.8	6.3	0	6.1	14
1090	2018-12-25	10.8	12.9	7.4	5.5	1020.9	1025.3	1018.5	6.8	83	6.2	11.1	0.2	0	10
1091	2018-12-26	9.4	11.2	8.2	3	1020.7	1023	1018.6	4.4	98	5.1	9.9	6.7	0	9
1092	2018-12-27	6.2	8.4	5.1	3.3	1028.9	1032	1022.9	9.1	76	5.6	10.1	4.8	0	8
1093	2018-12-28	2	5.1	-0.7	5.8	1036.6	1038.6	1031.9	6.7	60	6.3	11	0	6.4	6
1094	2018-12-29	-0.3	3.9	-3.2	7.1	1039.3	1040.7	1037.3	3.4	63	5.3	9.2	0	6.7	8
1095	2018-12-30	1.1	3.3	-0.3	3.6	1039.2	1041	1037	4	74	4.5	6.9	1.2	0	8
1096	2018-12-31	2.1	5	-0.4	5.4	1038	1040.3	1036.4	3.9	88	3.9	7.4	2.9	0	16
1097	2019-01-01	3.3	5.9	0.4	5.5	1037.7	1039.5	1036	3.5	73	4.6	7.5	0	1.3	14
1098	2019-01-02	3.6	5.9	1	4.9	1035.9	1038	1033.7	4.3	73.8	3.2	5.6	0	0	13
1099	2019-01-03	6.4	9.4	3.8	5.6	1033.5	1036	1031.9	4.1	82	3.3	5.5	0.3	0	11
1100	2019-01-04	9.2	10.8	8	2.8	1027.7	1032.7	1024.7	8	94	3.9	7.4	3.8	0	6
1101	2019-01-05	7	8.3	6	2.3	1026.8	1028.3	1024.8	3.5	99	4.5	9.1	5.1	0	9
1102	2019-01-06	6	7.5	5.3	2.2	1029.7	1031	1027.5	3.5	97.8	3.3	6.7	2.8	0	9
1103	2019-01-07	6.5	7.8	5.2	2.6	1027.7	1030.3	1025.6	4.7	96	3.1	5.2	2.9	0	6
1104	2019-01-08	6.3	7.5	5.6	1.9	1030.9	1033.3	1027.8	5.5	83.3	3.7	5.9	2.1	0	11
1105	2019-01-09	4.1	6	3.3	2.7	1031.9	1034.7	1029	5.7	95	3.4	5.8	4.9	0	6
1106	2019-01-10	6.3	7.5	4.2	3.3	1026.3	1029	1024.8	4.2	98	2.7	5.1	6.9	0	10
1107	2019-01-11	7.7	9.1	6.3	2.8	1023	1026.4	1020	6.4	99	2.6	5	13.8	0	6
1108	2019-01-12	6.4	8.1	5.8	2.3	1024.9	1027.1	1021.8	5.3	89.5	4.4	7.5	1.1	0	13
1109	2019-01-13	5.4	7.9	3.2	4.7	1027.3	1028.5	1026.2	2.3	80.8	3.2	5.1	0	0.5	15
1110	2019-01-14	5.7	11	-0.2	11.2	1025.6	1027.8	1023.6	4.2	87.3	3.2	5.3	0.5	0.8	8
1111	2019-01-15	7	8.1	6.3	1.8	1027.4	1030.8	1024	6.8	86.3	3.2	6.5	6.3	0	6
1112	2019-01-16	3.7	6.3	1.7	4.6	1030.1	1032	1028.1	3.9	70	4.1	7	0	2	6
1113	2019-01-17	1.6	8.8	-2.9	11.7	1028.9	1031	1027.3	3.7	82.3	4	6.9	0	8	10
1114	2019-01-18	3.6	9.9	-3.2	13.1	1026.9	1030.7	1023.6	7.1	82	4.7	8	0	7.3	8
1115	2019-01-19	8.1	10.7	4.2	6.5	1021.9	1023.8	1020	3.8	83.8	4.1	7.7	0.3	0	9
1116	2019-01-20	6.2	9.1	4.2	4.9	1028.3	1031.4	1022.6	8.8	74.3	5.2	9.9	0.1	0	12
1117	2019-01-21	2	8.4	-2.3	10.7	1028.8	1031.9	1026.6	5.3	82	4.1	7.5	0	6.7	6
1118	2019-01-22	3.2	10.9	-1.8	12.7	1025	1027.1	1023.7	3.4	74.3	6.3	12	0	7.5	12
1119	2019-01-23	3.2	13.4	-3	16.4	1024.3	1025.8	1023.4	2.4	78.5	3.8	6.8	0	8	4
1120	2019-01-24	3.4	12.9	-2.7	15.6	1024.8	1026.8	1023.5	3.3	78.5	2.6	4.4	0	8.5	14
1121	2019-01-25	5.6	13.5	-0.5	14	1026.6	1030.5	1023	7.5	79.3	4.8	7.8	0	4.3	17
1122	2019-01-26	2.8	6.8	-0.3	7.1	1034	1036.2	1030.5	5.7	66.8	4.3	9.3	0	1.5	16
1123	2019-01-27	1.9	9.6	-4.6	14.2	1029.8	1034.3	1025.7	8.6	83	3.8	6.7	0	9.6	11
1124	2019-01-28	5.9	9.1	0.3	8.8	1025.6	1027.5	1023.5	4	86.3	3.4	5.8	0	0	5
1125	2019-01-29	7.3	10.4	4.9	5.5	1026.4	1028.3	1024.4	3.9	84.5	3.2	5.7	0.9	0	5
1126	2019-01-30	11.1	16.7	6.8	9.9	1021.8	1025.6	1018.5	7.1	87.3	3.1	5.8	0	1.2	17
1127	2019-01-31	6.6	11.6	4.1	7.5	1023.8	1031	1013.8	17.2	87.3	6.3	12.9	4.3	0	8
1128	2019-02-01	2.6	5	-0.1	5.1	1029.3	1031.6	1026.8	4.8	80.3	4	7.4	0	0.6	5
1129	2019-02-02	10.2	16.1	-0.5	16.6	1018.1	1026.9	1012.9	14	77	4.4	8.6	0	1.2	13
1130	2019-02-03	10.5	15.5	6.5	9	1018.3	1025.5	1012.7	12.8	84	5.9	10.7	2.1	0	12
1131	2019-02-04	7	12.1	2	10.1	1026.6	1029	1024.6	4.4	79.5	3.9	6.5	0.3	3	8
1132	2019-02-05	9.4	11.7	7	4.7	1019.4	1025.4	1015.4	10	79.3	3.6	6.2	0.1	0	16
1133	2019-02-06	9.1	16.7	3	13.7	1015.3	1017.7	1012.6	5.1	91	4.7	7.6	0	6.7	15
1134	2019-02-07	8.6	13.1	5.1	8	1019.9	1026.5	1011.6	14.9	85	7.1	14.2	0.5	0	10
1135	2019-02-08	2.6	5.1	1.1	4	1025.7	1028.1	1022.8	5.3	91.8	4.5	9.3	3	0	7
1136	2019-02-09	2.7	4.7	1.8	2.9	1029.3	1031.9	1023.3	8.6	88.3	4.3	7.7	6.1	0	6
1137	2019-02-10	2.4	3.7	1.7	2	1031.3	1033.1	1029.7	3.4	93.3	3.5	6	4	0	9
1138	2019-02-11	2.6	4.6	0	4.6	1034	1035.5	1032.7	2.8	77.3	3.4	6.4	0	0	16
1139	2019-02-12	5.1	7.2	3	4.2	1029.5	1034	1025.9	8.1	91.3	4.3	8.4	21.6	0	6
1140	2019-02-13	6.5	8.5	5.6	2.9	1029.8	1032	1028.1	3.9	91.5	4.3	7.6	4.8	0	5
1141	2019-02-14	5.3	7.5	3.2	4.3	1028.6	1030.9	1026.3	4.6	95.3	4.4	8.3	13.5	0	9
1142	2019-02-15	6.2	6.7	4.8	1.9	1025	1027.5	1023.1	4.4	98.3	2.9	5.7	33.6	0	13
1143	2019-02-16	4.1	4.9	3.5	1.4	1028.1	1030	1026.7	3.3	80.5	3.5	6.2	2.9	0	9
1144	2019-02-17	4.6	7.6	2.6	5	1028.6	1030.5	1026.3	4.2	66.8	3	5.3	0	0	11
1145	2019-02-18	5.9	8.1	3.7	4.4	1021.5	1028	1017.4	10.6	97.5	4.5	7.6	19.5	0	9
1146	2019-02-19	7.2	8.9	6	2.9	1020.8	1024	1016	8	87.3	5.7	10.2	3.2	0.3	10
1147	2019-02-20	5.1	6.5	4.3	2.2	1025.9	1027.4	1023.9	3.5	98.3	3	5	20.7	0	10
1148	2019-02-21	6.2	7.4	5.5	1.9	1026	1028.4	1023.9	4.5	96.3	3.5	6	7.9	0	3
1149	2019-02-22	4.9	5.9	4.4	1.5	1024.4	1026.3	1021.3	5	91.5	4	7.4	8.9	0	12
1150	2019-02-23	5.2	8	2	6	1025.1	1027.3	1022.7	4.6	84.3	4.4	6.8	0	2.2	22
1151	2019-02-24	7.1	12.8	0.8	12	1023.3	1025.9	1020.8	5.1	73.8	3.2	5.3	0	5	17
1152	2019-02-25	7.7	11	3.5	7.5	1023.1	1024.3	1021.9	2.4	79	2.3	4.3	0	0	10
1153	2019-02-26	7.3	13	1.9	11.1	1023.7	1026.8	1019.4	7.4	88.3	5.3	8.5	2.3	3.6	12
1154	2019-02-27	8.1	9.5	7.5	2	1020	1022.9	1017.2	5.7	96.3	4	7.1	8.3	0	10
1155	2019-02-28	8.4	11.4	7.1	4.3	1021	1022.4	1019.9	2.5	84.3	3.8	6.3	0	0	17
1156	2019-03-01	6.9	9.6	3.1	6.5	1022.7	1024.4	1021.1	3.3	91	2.5	4.4	5	0	20
1157	2019-03-02	7.1	8	6.2	1.8	1017.5	1023.1	1014.7	8.4	95	4	7.4	16.1	0	10
1158	2019-03-03	7.9	11.1	6.1	5	1014.6	1017.6	1013	4.6	80.5	5.5	9.5	0	0.7	18
1159	2019-03-04	9.1	14.2	7.3	6.9	1019.2	1021	1015.6	5.4	73.8	4	7.6	0	5.2	24
1160	2019-03-05	9.2	10.5	5.7	4.8	1017.5	1021.8	1014.1	7.7	90	4.6	8.1	7.4	0	17
1161	2019-03-06	11.2	14.7	9.2	5.5	1018.3	1021.2	1015	6.2	86	4.6	7.7	0.5	1.9	14
1162	2019-03-07	8.4	12.4	6	6.4	1025.3	1027.8	1021.1	6.7	64	6.1	10.7	0	7.2	17
1163	2019-03-08	5.9	10.5	-1	11.5	1024.7	1027.3	1022	5.3	83.3	4.7	8.1	0	3.3	13
1164	2019-03-09	9.9	11.7	8.2	3.5	1016.6	1022.5	1013.2	9.3	95.3	3.5	7.3	7.7	0	11
1165	2019-03-10	10.1	11.6	8.6	3	1015.7	1017.2	1013.6	3.6	88.3	5.4	9.9	0.1	0	17
1166	2019-03-11	11.2	18.7	3.4	15.3	1015.7	1017.6	1013.5	4.1	72	6.2	12.7	0	8.2	14
1167	2019-03-12	12.6	20.7	4.1	16.6	1017.4	1019.3	1015.2	4.1	63.5	7.9	13.9	0	9.5	10
1168	2019-03-13	8.8	13.6	2.1	11.5	1024.6	1026.6	1019.4	7.2	77.3	4.4	7.2	0	9.9	12
1169	2019-03-14	8.9	11	6.9	4.1	1025.6	1027.3	1023.4	3.9	87	5.8	10.1	4.4	1.6	13
1170	2019-03-15	11.6	19.8	5.1	14.7	1023.5	1025.8	1021.2	4.6	79.3	5.6	11.2	0	9.7	9
1171	2019-03-16	12.5	19.5	2.7	16.8	1023.3	1025.9	1020.7	5.2	60.8	4	6.3	0	7.8	14
1172	2019-03-17	12.7	22.9	4.3	18.6	1022.1	1024.3	1020.5	3.8	77.3	4.2	6.9	0	7.9	12
1173	2019-03-18	10.6	13.3	9.7	3.6	1019	1022.5	1016.4	6.1	96.5	4.6	8.5	5.5	0	13
1174	2019-03-19	11.9	17.7	4.4	13.3	1017.5	1020.3	1015	5.3	78.3	5.4	10.2	0	10.4	6
1175	2019-03-20	18	26.5	12	14.5	1006.9	1016	1000.6	15.4	78.3	6.4	12.3	0.6	6.9	8
1176	2019-03-21	14.4	19.9	9.5	10.4	1013.3	1018.7	1006	12.7	91.8	5.2	8.8	4.6	0	12
1177	2019-03-22	9.3	12.8	7.6	5.2	1023.1	1024.8	1018.1	6.7	67.5	4.8	9	0.6	0.9	9
1178	2019-03-23	9.3	16.1	5.9	10.2	1026.6	1028.1	1024.3	3.8	67.8	4.1	6.9	0	7.4	15
1179	2019-03-24	9.8	13.8	3.1	10.7	1023.7	1027.6	1020.3	7.3	72.5	4.9	7.6	0	7.9	22
1180	2019-03-25	10.9	13.9	9.4	4.5	1018.3	1021	1016.9	4.1	85.5	4.3	7.4	1.9	0	12
1181	2019-03-26	13.2	20.2	5.3	14.9	1020.8	1023.1	1018.8	4.3	76.8	4	5.8	0	9.2	14
1182	2019-03-27	14.7	18.7	12.5	6.2	1014.7	1020	1011.2	8.8	80.5	3.9	6.4	3.5	1.5	9
1183	2019-03-28	14	19.5	12.6	6.9	1012.5	1013.9	1010.9	3	94	4	6.3	12.2	2.2	12
1184	2019-03-29	14.2	17.7	12	5.7	1013.8	1015.1	1012.4	2.7	86	4.8	8.5	0.6	4.6	8
1185	2019-03-30	13.4	20.3	8.7	11.6	1017.8	1022.1	1013.9	8.2	81	5.8	10.1	0	7.2	15
1186	2019-03-31	11	15.3	7.7	7.6	1026.6	1028	1022.2	5.8	49.3	4.1	7	0	5.5	17
1187	2019-04-01	10.7	17.4	2.5	14.9	1026.1	1028.1	1023.6	4.5	61	4.1	6.6	0	0	17
1188	2019-04-02	13.1	16	7.3	8.7	1022.1	1024.2	1019	5.2	64.3	4.8	8.1	0	2	11
1189	2019-04-03	13	17.5	10.5	7	1023.7	1026.2	1021.7	4.5	80.3	2.8	4.5	0	1.6	13
1190	2019-04-04	11.9	13.6	8.7	4.9	1020.3	1024.8	1016.5	8.3	94.3	4.4	7.1	0.5	0	15
1191	2019-04-05	16	23.4	11.8	11.6	1014	1017.6	1011.7	5.9	77.3	4.3	7.9	0.1	9.2	24
1192	2019-04-06	16.9	24.4	9.9	14.5	1011.3	1014	1008.3	5.7	74.5	4.4	7.6	0	10.7	14
1193	2019-04-07	20.5	30	11.3	18.7	1009.4	1010.4	1007.5	2.9	66.3	5.1	8.9	0	9.9	23
1194	2019-04-08	19.4	26.2	13.5	12.7	1010.8	1013.1	1008.5	4.6	79	4.9	8.6	0	10.5	14
1195	2019-04-09	19.2	29.3	16	13.3	1005.5	1010.3	999	11.3	92.3	9.1	17.3	25.4	3.6	10
1196	2019-04-10	11.4	15.9	10.2	5.7	1016.9	1019	1007.8	11.2	78.3	7.8	15.1	0.2	0	15
1197	2019-04-11	10.3	13.6	9	4.6	1017.2	1018.3	1015	3.3	83	2.6	4.8	1.4	0.2	10
1198	2019-04-12	11.4	18	4.6	13.4	1019.9	1021.3	1018.3	3	78	4.5	7.6	0	4.6	14
1199	2019-04-13	14.8	18.9	11	7.9	1017.6	1020.4	1015.4	5	73	4.6	7.4	0	4.6	11
1200	2019-04-14	15.7	21	13	8	1018.2	1020.9	1014.9	6	78.8	5.2	9.7	0	0	16
1201	2019-04-15	12.8	18.5	4.2	14.3	1020.9	1023	1017.9	5.1	65.5	4.8	7.9	0	11.5	11
1202	2019-04-16	14.4	17.6	13	4.6	1014.7	1019.3	1012.2	7.1	75.8	4.4	7.4	0	2.1	13
1203	2019-04-17	15.8	22.4	12.3	10.1	1012.3	1014.6	1010.5	4.1	90	3.8	6.4	0	6.2	12
1204	2019-04-18	20	26.7	14.7	12	1009.8	1011.5	1008.2	3.3	73.8	3.5	6.2	0	10.3	16
1205	2019-04-19	20.8	26.6	16.3	10.3	1010.3	1012.1	1008.8	3.3	86.5	4.2	7.1	0	8	8
1206	2019-04-20	19.4	21.4	18.4	3	1010.5	1011.9	1008.8	3.1	90.8	5.9	9.6	0	0	24
1207	2019-04-21	20.2	25	17.9	7.1	1008.7	1009.9	1007.2	2.7	93.5	4.4	7.3	0.1	2.1	18
1208	2019-04-22	18.8	19.9	18.3	1.6	1009.7	1011.4	1008.5	2.9	100	3.9	6.4	0.2	0	9
1209	2019-04-23	21.6	26.4	18.2	8.2	1007.8	1010.6	1006.3	4.3	90.3	4.5	7.5	5.6	2.1	14
1210	2019-04-24	21.9	25.6	20.2	5.4	1007.7	1008.9	1005.7	3.2	95	3.2	5.6	0.7	0	13
1211	2019-04-25	19.6	23.9	17.6	6.3	1009.1	1011.6	1007.2	4.4	90.5	3.1	5.3	0	1.1	12
1212	2019-04-26	14.7	18.8	12	6.8	1016.4	1021.3	1011.6	9.7	81.8	5.6	9.9	0	0	13
1213	2019-04-27	13.4	17.6	7.1	10.5	1019.7	1022.3	1016	6.3	72.5	5.6	9.7	0	6.2	15
1214	2019-04-28	16.6	19	14.5	4.5	1014.3	1017.5	1012.7	4.8	90	5	10.2	0.7	0	14
1215	2019-04-29	17.3	19.2	16.1	3.1	1010.4	1014.6	1007.8	6.8	95	4.2	7	4.8	0	9
1216	2019-04-30	15.1	16.7	13.8	2.9	1010.7	1011.8	1009.3	2.5	93.5	3	5.5	5.3	0	12
1217	2019-05-01	17.4	24.4	13.5	10.9	1012.3	1014.2	1010.4	3.8	76.8	5.4	9.1	0	4	26
1218	2019-05-02	16.6	24.8	9.1	15.7	1016.6	1017.9	1014.2	3.7	69.3	3.6	6.4	0	11	22
1219	2019-05-03	17.4	25.7	7.6	18.1	1018.7	1020.6	1017.2	3.4	61.5	4.3	6.9	0	12	19
1220	2019-05-04	17.8	25.9	9.6	16.3	1017.2	1020	1014.4	5.6	60	4.8	7.9	0	11.1	18
1221	2019-05-05	19	23.4	13.9	9.5	1014.4	1016.2	1012.4	3.8	75.8	4.1	7.6	0	9.5	23
1222	2019-05-06	17.1	20.2	14.5	5.7	1018.5	1020.3	1014.6	5.7	61.8	5.8	10.8	0	1.9	13
1223	2019-05-07	15.3	21	8.5	12.5	1018.4	1020.5	1016.7	3.8	52.8	4.4	10.2	0	9	8
1224	2019-05-08	16.3	20.6	12.7	7.9	1013.2	1017.5	1009.5	8	66	4.4	8	0	1.7	19
1225	2019-05-09	18.3	26	10.7	15.3	1010.5	1011.6	1008.5	3.1	74.5	5.3	7.9	0	9.5	19
1226	2019-05-10	20	25.6	16.3	9.3	1011.7	1012.5	1010.7	1.8	73.8	4.2	7.4	0	8.3	18
1227	2019-05-11	20.9	27.3	15.2	12.1	1012.8	1013.9	1011.4	2.5	75.3	4.6	7.2	0	11.7	24
1228	2019-05-12	21.1	26.4	15.7	10.7	1012.7	1014.1	1011.9	2.2	70.3	4.9	9	0	9.7	24
1229	2019-05-13	18.5	21.4	16.5	4.9	1011.5	1013.2	1010.1	3.1	87.5	5.1	8.3	8.6	0	11
1230	2019-05-14	18.1	20.6	16.3	4.3	1011.2	1012.9	1009.4	3.5	89	4.3	6.8	0	0	22
1231	2019-05-15	19.1	20.6	17.3	3.3	1009.4	1013.1	1007.5	5.6	93.5	4.2	6.8	1.1	0	13
1232	2019-05-16	20.8	24.5	18	6.5	1007	1008.8	1005.4	3.4	93	3.5	6.1	0	0	19
1233	2019-05-17	22	25	19.6	5.4	1004.2	1007.3	1001.9	5.4	93.3	4.3	7.7	0	0.1	15
1234	2019-05-18	21.9	25.2	19.7	5.5	1004.7	1005.7	1002.7	3	82.5	5.4	9.2	0	3.2	20
1235	2019-05-19	21.1	25.1	17.3	7.8	1006.9	1008.1	1005.3	2.8	89	2.3	3.7	0	0	19
1236	2019-05-20	21.9	26.6	18.8	7.8	1011.4	1013.7	1008.1	5.6	56	5.8	10.2	0	6.8	17
1237	2019-05-21	19.6	26.2	11	15.2	1011.7	1014	1008.7	5.3	53	4.1	8	0	11.4	18
1238	2019-05-22	22.9	30	14.3	15.7	1009	1010.6	1007	3.6	54.8	4.4	7.5	0	12.2	20
1239	2019-05-23	24.3	32.5	14.7	17.8	1010.9	1012	1008.7	3.3	62	4.1	6.7	0	12.6	17
1240	2019-05-24	24.6	30.2	14.7	15.5	1011.5	1013.5	1009.5	4	55	5.9	11	0	12.7	16
1241	2019-05-25	24.3	27.3	22.3	5	1009.9	1011.1	1008.5	2.6	70.8	6	11.5	0	3.6	11
1242	2019-05-26	22.5	23.9	21	2.9	1006.6	1010.5	1004	6.5	94.3	6.5	11	29.3	0	15
1243	2019-05-27	24.4	31	19.2	11.8	1007.9	1013.5	1004.3	9.2	80.8	7.2	13	2.4	2.5	14
1244	2019-05-28	21.3	26.2	16.4	9.8	1015.4	1016.6	1013.5	3.1	43.3	5.3	9.5	0	12.8	26
1245	2019-05-29	20.2	27.1	13.5	13.6	1014.3	1015.8	1013	2.8	63	3.5	7.2	0	7.6	14
1246	2019-05-30	20.7	25.7	14.6	11.1	1010.7	1014	1008.2	5.8	65.3	4.8	8.8	0.2	0.9	14
1247	2019-05-31	20.3	25.6	17.5	8.1	1010.3	1011.6	1008.7	2.9	84.5	3.5	5.9	6.8	3.6	11
1248	2019-06-01	19.4	22.7	17.4	5.3	1009.4	1011.4	1007.1	4.3	87.5	3.8	6.8	0	0.4	17
1249	2019-06-02	21.4	25.5	16.7	8.8	1006.4	1008.5	1005.2	3.3	74.3	3.8	6.4	0	5.7	25
1250	2019-06-03	21.9	26.2	17.6	8.6	1006.3	1007.1	1004.8	2.3	85	4.8	7.9	0	10.7	22
1251	2019-06-04	23.9	30	20.2	9.8	1007.3	1008.7	1005.9	2.8	85.5	4.4	7.6	0	7.9	16
1252	2019-06-05	24.2	28.4	21.3	7.1	1008.8	1010.9	1007	3.9	89.3	5.8	9.3	0	7.6	11
1253	2019-06-06	27.2	33	23.3	9.7	1003.2	1008.3	1000.2	8.1	77.3	9.2	16.4	0	1.8	20
1254	2019-06-07	23.1	27.3	21.3	6	1008.8	1010.5	1003.2	7.3	70.8	6	12.2	0	2.5	26
1255	2019-06-08	23.2	26.2	19.9	6.3	1007.1	1009.6	1005	4.6	81.3	5	8	0	9.7	21
1256	2019-06-09	23.9	27.5	22.1	5.4	1003.4	1005.6	1001.8	3.8	86.8	4.6	7.7	0	2.5	29
1257	2019-06-10	24.6	29.2	21.2	8	1003.3	1005	1001.7	3.3	87.3	4.1	7	0.8	2.8	16
1258	2019-06-11	22.6	28	17.7	10.3	1007.6	1008.6	1005	3.6	81.5	4.6	7.6	0	4.7	13
1259	2019-06-12	21.4	25.4	17.9	7.5	1009.6	1010.9	1008.6	2.3	79	4.4	7.5	0	2.3	21
1260	2019-06-13	21.1	23.3	19	4.3	1007.1	1009.4	1004	5.4	84.3	5	8.1	3.5	0	19
1261	2019-06-14	21.3	27.5	16.3	11.2	1004.7	1007.2	1002.5	4.7	77	4.7	9	4.2	0	15
1262	2019-06-15	23.9	31.8	15.7	16.1	1005.8	1007.2	1004	3.2	74.5	4.1	7.1	0	0	20
1263	2019-06-16	26.3	31.3	22.5	8.8	1007.9	1009	1005.9	3.1	72.3	3.6	6	0	0	21
1264	2019-06-17	26.2	29.8	24	5.8	1010.1	1011.2	1008.7	2.5	60	5.8	9.7	0	0	19
1265	2019-06-18	23	24.6	21.4	3.2	1006.4	1011.1	1004.5	6.6	98.8	4.7	8.4	82.2	0	10
1266	2019-06-19	23.6	25.3	22.5	2.8	1006	1006.9	1004.8	2.1	94.5	2.3	4.2	10.4	0	24
1267	2019-06-20	22.7	23.8	21.5	2.3	1005.8	1007.7	1004.6	3.1	95.8	4.4	7.2	20.5	0	17
1268	2019-06-21	22.4	24.9	21.5	3.4	1003.8	1005.7	1001.8	3.9	97.3	4.1	7.7	62.1	0	20
1269	2019-06-22	22.4	26.9	19.9	7	1006	1006.7	1005.4	1.3	89	4.2	6.6	0.2	0	15
1270	2019-06-23	23.2	27.8	17.1	10.7	1007.6	1009.2	1005.8	3.4	78.5	3.2	6	0	0	29
1271	2019-06-24	23.1	26.2	20.1	6.1	1011	1012	1009.2	2.8	79.5	5.4	9.3	0	0	14
1272	2019-06-25	22.3	24.2	21	3.2	1009.8	1011.8	1008.7	3.1	90.3	6.2	10	10.6	1	11
1273	2019-06-26	22	23.2	20.5	2.7	1004.9	1009.4	1002.6	6.8	98	4.2	7	29.2	0	16
1274	2019-06-27	25.4	31.1	21.5	9.6	1001.5	1003.6	999.8	3.8	86.3	3.5	5.8	0.4	5.2	22
1275	2019-06-28	27.5	32.8	22.9	9.9	999.9	1001.8	997.7	4.1	84.3	3.4	5.8	0	12.3	17
1276	2019-06-29	27.3	32.9	26	6.9	997.5	1000.1	995.3	4.8	95.5	7.1	14.5	7.6	0	17
1277	2019-06-30	24.6	26.1	22.7	3.4	1001.5	1003.7	999.2	4.5	98.5	4.1	6.7	64.8	0	21
1278	2019-07-01	24.2	25.7	21.7	4	1005.5	1007.6	1002.9	4.7	91.8	4.5	8.8	7.2	0.1	23
1279	2019-07-02	24.4	28.3	22.2	6.1	1007.8	1008.8	1006.5	2.3	89.8	5.5	8.8	0.2	1.3	14
1280	2019-07-03	24.6	28.5	23.2	5.3	1006.4	1008.2	1004.9	3.3	90.8	3.7	6.7	0.3	2.3	26
1281	2019-07-04	23.4	26.4	20.7	5.7	1006.5	1007.9	1005	2.9	90.3	3.5	5.8	0	2	20
1282	2019-07-05	24.4	28	22.8	5.2	1001.8	1005.7	1000	5.7	87.5	2.9	4.7	0	2	26
1283	2019-07-06	25.9	29.7	21.7	8	999.8	1001.3	997.6	3.7	84.5	5.2	8.3	0	7.7	27
1284	2019-07-07	26.2	30.7	23.5	7.2	1001.2	1003.1	998.1	5	82	5.5	8.9	1.2	5.8	23
1285	2019-07-08	26.1	31.2	21.2	10	1004.3	1005.1	1003	2.1	79.3	4.2	7.7	0	5.4	21
1286	2019-07-09	22.6	25.7	21	4.7	1002	1005.1	1000.1	5	96.5	4.6	9.3	23	0	9
1287	2019-07-10	22	25.5	20.8	4.7	1003.1	1005.7	1000.5	5.2	98	4	7.2	14.9	0	29
1288	2019-07-11	24.9	29.1	21.5	7.6	1008	1009.2	1005.7	3.5	88	3.1	6.7	0	3	29
1289	2019-07-12	25.2	26.9	23.7	3.2	1005.6	1008.8	1002.3	6.5	93.3	4	6.8	11.4	0	23
1290	2019-07-13	22.5	24.3	21.5	2.8	1000.8	1003	999.7	3.3	99.3	4.5	9.6	47.2	0	12
1291	2019-07-14	24.2	28.9	20.7	8.2	1003.5	1004.7	1002	2.7	87.3	3.6	6.3	0	7.3	23
1292	2019-07-15	25.2	29.1	20.5	8.6	1005.5	1006.5	1004.1	2.4	87.8	4.6	7.9	0	9	22
1293	2019-07-16	25.9	27.7	24.8	2.9	1006.6	1007.5	1005.8	1.7	94.3	4.5	6.9	0	0	15
1294	2019-07-17	27.9	31.3	25.8	5.5	1005.2	1007.4	1003.3	4.1	88.3	5.7	10.6	0	6.2	18
1295	2019-07-18	28.1	31.3	26.2	5.1	1002	1005.5	999.8	5.7	90.5	4.8	8	0	4.1	22
1296	2019-07-19	26.9	30.9	26	4.9	997.4	1001	995.9	5.1	93.5	6	9.5	0.8	1.2	18
1297	2019-07-20	28.1	32.5	25.6	6.9	1002.1	1003.5	998.3	5.2	84.3	3.7	6.5	0	4.1	23
1298	2019-07-21	29.5	35.1	24.9	10.2	1003.6	1004.8	1002.7	2.1	84.5	3.8	5.9	0	11.6	22
1299	2019-07-22	30.3	33.9	27	6.9	1002.7	1004.7	1000.7	4	83.5	4	7.9	0	11.1	15
1300	2019-07-23	31.2	35.3	27.7	7.6	1001.9	1003.2	999.6	3.6	74.3	4.2	7.3	0	12.1	20
1301	2019-07-24	31.4	36.1	28.9	7.2	1002.9	1003.6	1001.4	2.2	77	3.4	5.7	0	6.6	17
1302	2019-07-25	32.2	36.8	28.7	8.1	1003.5	1005	1001.7	3.3	75	4.2	6.9	0	8.5	23
1303	2019-07-26	32	37.3	28.1	9.2	1002.5	1003.7	1000.3	3.4	78	3.5	6.7	0	9.2	25
1304	2019-07-27	31.6	34.1	29.6	4.5	1002.5	1003.7	1000.7	3	77	3.7	6.6	0	0	24
1305	2019-07-28	31.1	35.6	28.6	7	1004.9	1006.3	1003.3	3	74.5	4.5	8.2	0	6.2	24
1306	2019-07-29	31.6	35.7	28.1	7.6	1005.9	1007.6	1004.5	3.1	70.3	5.3	9.9	0	12.7	22
1307	2019-07-30	31.9	36.4	28.4	8	1005.8	1007	1004.2	2.8	71	4.7	7.3	0	12.7	29
1308	2019-07-31	30.5	33.4	28.4	5	1006.8	1007.6	1005	2.6	72.8	5.2	9.1	0	8.7	19
1309	2019-08-01	30.5	33.3	28	5.3	1007.7	1009.3	1006.1	3.2	72	6.6	10.9	0	12.8	18
1310	2019-08-02	29.7	32.8	27.5	5.3	1007.9	1009.1	1005.7	3.4	77.3	6.7	11	0	11.4	23
1311	2019-08-03	28.9	32.7	26.2	6.5	1006.6	1008.5	1005.3	3.2	83.5	5.3	9.2	14.9	7.3	24
1312	2019-08-04	25.6	28.9	24.6	4.3	1005.6	1006.9	1004.6	2.3	96.3	4	7.1	37.2	0.3	24
1313	2019-08-05	28.7	31.6	26	5.6	1006.3	1007.7	1005.1	2.6	87	5.2	9.6	0	8.3	17
1314	2019-08-06	29.1	32.6	26.1	6.5	1005.1	1006.8	1003.2	3.6	78.3	4.2	6.8	0	11.5	27
1315	2019-08-07	28.7	32.4	24.6	7.8	1003.7	1005.4	1001.8	3.6	85	5.1	9.1	0	9.7	11
1316	2019-08-08	29.7	33.1	27.8	5.3	1003.1	1004.3	1001.7	2.6	85.8	6.1	10.4	0.3	6.1	18
1317	2019-08-09	27.4	31.3	24.7	6.6	998.7	1003.2	995.4	7.8	91.8	8.3	15.9	37.8	0	17
1318	2019-08-10	26.8	28.3	25.4	2.9	986.2	995.6	982.3	13.3	98.3	10.8	21.3	122	0	12
1319	2019-08-11	28.8	33.4	25.9	7.5	991.2	996.2	983.5	12.7	83.8	7.8	14	15.3	0	28
1320	2019-08-12	29.1	34.1	23.7	10.4	998.4	999.5	996.2	3.3	75.5	5.1	7.8	0	0	24
1321	2019-08-13	29.6	34.2	26.5	7.7	1000.3	1001.2	999.2	2	77.3	7.8	12	0	0	19
1322	2019-08-14	29.7	35.2	24.9	10.3	999.9	1002.2	997.9	4.3	79.5	3.7	6.7	0.4	0	15
1323	2019-08-15	28.4	31.8	25.8	6	998.6	999.6	996.6	3	83.3	4.8	8.1	0	0	21
1324	2019-08-16	29.4	34.3	24.1	10.2	999.8	1001.1	998.1	3	74	3.4	5.2	0	0	17
1325	2019-08-17	30.5	36.6	24.3	12.3	1002.5	1003.5	1000.9	2.6	70.3	3.7	5.3	0	0	14
1326	2019-08-18	27.8	34.1	23.7	10.4	1005.1	1006.5	1003.4	3.1	90.8	6.2	13.1	1.3	0	22
1327	2019-08-19	27.5	32.1	24.1	8	1007.2	1008.2	1005.9	2.3	88	4.3	8.4	2.7	0	21
1328	2019-08-20	27.1	31.2	22.8	8.4	1007.5	1008.9	1005.8	3.1	79.8	4.4	7.1	0	0	18
1329	2019-08-21	28.2	34.4	22.1	12.3	1006.2	1007.2	1004.9	2.3	76	4	6.4	0	0	29
1330	2019-08-22	28.7	33.3	24.2	9.1	1008	1008.9	1006.8	2.1	81	3.7	6.5	0	0	15
1331	2019-08-23	27.4	32.2	26.2	6	1009.3	1010.3	1008.2	2.1	94.5	4	8.1	9.6	0	14
1332	2019-08-24	28.4	33.2	25.9	7.3	1009.3	1010.7	1008.2	2.5	88	4.2	7	12.9	0	25
1333	2019-08-25	29.1	32.4	27	5.4	1008.7	1010	1007.2	2.8	88.5	5.5	9.3	2.3	0	20
1334	2019-08-26	30.9	35	27.5	7.5	1006.3	1009.1	1005.1	4	79	4.3	8.1	0.9	0	18
1335	2019-08-27	30.9	36.5	27.9	8.6	1006.2	1007.5	1005.1	2.4	81.8	4.3	7	2.6	0	28
1336	2019-08-28	28.3	33.1	25.3	7.8	1007.3	1009.4	1005.9	3.5	89.3	7.3	12	35.4	0	15
1337	2019-08-29	21.6	27.1	18.6	8.5	1009.4	1011.7	1006.4	5.3	98.8	4.8	7.9	38.8	0	15
1338	2019-08-30	23.6	29.7	18.2	11.5	1011.3	1012.3	1010	2.3	85.3	2.5	4.4	0	0	18
1339	2019-08-31	24.3	29.2	21.3	7.9	1013	1014.3	1011.9	2.4	86.5	4.5	7.8	1.7	0	23
1340	2019-09-01	20.9	22.7	19.3	3.4	1014.6	1016.2	1013.3	2.9	97.8	5.2	10	16.4	0	13
1341	2019-09-02	22.3	24.8	20.8	4	1013.7	1015.9	1012.7	3.2	99.3	4.3	8.5	76.6	0	12
1342	2019-09-03	23.9	27.1	21.8	5.3	1011.8	1014.3	1010.5	3.8	95	2.8	4.7	1.8	0	17
1343	2019-09-04	24.1	26.2	23	3.2	1010.1	1011.8	1008.6	3.2	99.3	2.6	5.5	12.2	0	10
1344	2019-09-05	27	30.8	23.7	7.1	1007.1	1009.9	1005.6	4.3	88.5	3.9	6.6	1.2	0	16
1345	2019-09-06	25.3	28.5	24.1	4.4	1001.5	1006.2	998.1	8.1	96.3	7.2	12.2	10.9	0	20
1346	2019-09-07	25.4	29.9	22.9	7	1003.3	1005.9	998.6	7.3	82.5	4.7	9	0	0	21
1347	2019-09-08	25.8	31.4	20.7	10.7	1005.8	1006.8	1004.6	2.2	82.8	2.9	5.1	0	0	27
1348	2019-09-09	25.4	30.9	21.9	9	1006.1	1007.3	1004.8	2.5	87	4.1	7.1	0	0	16
1349	2019-09-10	27.1	31.7	22.4	9.3	1010.1	1011.7	1007.3	4.4	84.5	3.1	4.9	0	0	11
1350	2019-09-11	27.3	31.9	24.3	7.6	1013.6	1014.9	1011.7	3.2	89.8	3.8	6.2	0	0	10
1351	2019-09-12	26.9	31.6	23.4	8.2	1012.6	1014.7	1011	3.7	85.3	4	6.8	0	6.6	21
1352	2019-09-13	26.1	30.8	21.5	9.3	1010.4	1012.5	1008.5	4	81.5	3.3	6.5	0	9.8	32
1353	2019-09-14	26.7	30.8	22.7	8.1	1011.2	1012.1	1010.1	2	83.3	3	4.9	0	5.3	25
1354	2019-09-15	26	29.5	24	5.5	1010.7	1012.3	1009.4	2.9	82	4	6.6	0	2	15
1355	2019-09-16	24.1	29.9	19.1	10.8	1011.4	1012.7	1010.2	2.5	73.5	4.1	8	0	11	17
1356	2019-09-17	24.5	29.8	20.6	9.2	1013.3	1014.7	1011.9	2.8	78.8	3.6	7.1	0	7.2	16
1357	2019-09-18	24.6	29.6	19.9	9.7	1017.1	1018.7	1014.7	4	71.3	5.4	9.9	0	11.3	20
1358	2019-09-19	21.8	27.5	16.7	10.8	1017.3	1019.1	1015.3	3.8	71	4.9	8.4	0	8.9	23
1359	2019-09-20	22.2	27.5	16.8	10.7	1013.5	1016.8	1011.6	5.2	71	5.2	9.3	0	9.6	16
1360	2019-09-21	19.9	21.3	18.8	2.5	1010.3	1013.2	1009.4	3.8	93.5	6.5	12.7	20.9	0	13
1361	2019-09-22	20.9	23.1	18.9	4.2	1011	1014.9	1006.9	8	79.5	8.3	15.2	0.7	0	18
1362	2019-09-23	22	27.1	17	10.1	1017.9	1019.7	1014.9	4.8	72.8	4.6	7.8	0	10.1	21
1363	2019-09-24	21	28.2	15.3	12.9	1019.6	1021.3	1018.3	3	79.8	2.8	5.8	0	9.1	13
1364	2019-09-25	21.8	28.6	15.3	13.3	1019.3	1020.5	1017.8	2.7	79.5	2.5	4.3	0	8.8	15
1365	2019-09-26	22.4	27.6	16.9	10.7	1020.3	1021.6	1019.1	2.5	73	4	6.9	0	8.2	17
1366	2019-09-27	22.5	28.6	16.7	11.9	1020.1	1021.9	1018.8	3.1	77.3	3	6.5	0	9.2	12
1367	2019-09-28	22.7	28.7	17.4	11.3	1018	1019.9	1016.2	3.7	82.8	2.9	5.5	0	8.7	20
1368	2019-09-29	22.9	28.8	17.8	11	1016.6	1018.2	1014.7	3.5	82.3	3.7	6	0	8.3	17
1369	2019-09-30	22.9	28.5	17.5	11	1014.9	1016.4	1013.8	2.6	88.5	3.4	5.3	0	4.1	20
1370	2019-10-01	22.9	24.9	21.6	3.3	1008.5	1014.8	1002.9	11.9	97	10.6	18.7	59.9	0	8
1371	2019-10-02	23.5	27.6	21.6	6	1007.5	1011.2	1000.8	10.4	91.8	8.7	18.2	18.3	3.5	24
1372	2019-10-03	24.1	29.5	18.9	10.6	1012.3	1013.6	1010.7	2.9	87.5	2.8	5.4	0	10.4	23
1373	2019-10-04	24.9	29.1	21	8.1	1012.3	1013.2	1010.7	2.5	91.3	3.4	5.5	0	6.5	22
1374	2019-10-05	23	27.3	21.1	6.2	1017.6	1020.8	1013.2	7.6	84.5	5.1	10.2	0	2.8	25
1375	2019-10-06	21.1	23.8	19.1	4.7	1020.7	1022.6	1019.4	3.2	72.8	3.2	6	0	0.5	21
1376	2019-10-07	20.3	25	17.7	7.3	1019	1020.2	1017.4	2.8	89.8	4.5	7.6	0	0.4	27
1377	2019-10-08	18.3	20.2	17.1	3.1	1021.5	1023.1	1020	3.1	80.8	3.7	6.5	0	0	16
1378	2019-10-09	19.5	23	17.2	5.8	1019	1022.8	1016.3	6.5	80.3	3.4	5.4	0	0	15
1379	2019-10-10	22.2	26.4	17	9.4	1014	1017.1	1011.8	5.3	77.5	3.4	6.5	0	9.4	12
1380	2019-10-11	23.5	27.4	20.5	6.9	1012.8	1013.7	1011.6	2.1	84.8	3.7	6	0	0	12
1381	2019-10-12	22.4	25.9	20.3	5.6	1014.7	1016.4	1013.5	2.9	76.5	4.1	7.1	0	0	20
1382	2019-10-13	20.5	25.4	16.7	8.7	1018.8	1020.7	1016.3	4.4	86	3.1	4.7	0	0.9	15
1383	2019-10-14	21	26.1	19.5	6.6	1024.8	1028	1020.7	7.3	79	5.4	9.6	0	0	15
1384	2019-10-15	16.2	20.1	12.5	7.6	1028.6	1030.5	1027.1	3.4	67.5	4.9	9.4	0	0	24
1385	2019-10-16	17	22.3	11.5	10.8	1025	1028.9	1022.8	6.1	70.5	3	5	0	0	14
1386	2019-10-17	18.2	22.9	15.6	7.3	1022.4	1024.1	1020.5	3.6	78	4	7.2	0	0	16
1387	2019-10-18	17.7	22.8	13.5	9.3	1021.3	1022.5	1020	2.5	77	5.2	8.8	0	7.2	16
1388	2019-10-19	17.4	24	12	12	1022.2	1023.9	1021.1	2.8	78	3.4	6	0	9.3	25
1389	2019-10-20	17.3	24.6	10.7	13.9	1020.8	1022.9	1018.9	4	79.5	3	5.6	0	9.8	22
1390	2019-10-21	17	23.8	10.7	13.1	1017.6	1020	1015.5	4.5	80.5	2.7	4.6	0	8	16
1391	2019-10-22	17.2	23.6	11.5	12.1	1015.7	1017.4	1014.1	3.3	80	2.8	5	0	4.5	22
1392	2019-10-23	18.8	24.7	14.7	10	1016	1017.1	1014.3	2.8	80.8	4	6.7	0	3.8	9
1393	2019-10-24	18.9	24.3	14.3	10	1018.6	1020.2	1017	3.2	78.3	3.9	7.7	0	8.9	13
1394	2019-10-25	18.3	24.3	13	11.3	1020.5	1021.8	1019	2.8	79.3	4.1	7.1	0	3	10
1395	2019-10-26	17.7	20.1	16	4.1	1022.2	1023.7	1020.7	3	75.5	3.4	5.6	0	0.3	13
1396	2019-10-27	14.7	17.5	13.5	4	1020.5	1022.4	1018.7	3.7	81.3	2.9	4.1	0	0	14
1397	2019-10-28	14.1	19.8	10.3	9.5	1017.5	1019.6	1015.1	4.5	92	3.4	5	0	0.9	5
1398	2019-10-29	15.8	22.7	12.1	10.6	1019.4	1021.5	1017.2	4.3	76.5	4.4	7.7	0	8.5	10
1399	2019-10-30	14.9	23.4	8.4	15	1022.1	1024.2	1020.8	3.4	81.3	3.7	6.7	0	9.2	18
1400	2019-10-31	15.2	23.3	9	14.3	1021.8	1023.3	1020.4	2.9	81.5	3	5.5	0	9.6	16
1401	2019-11-01	16	24.4	9.1	15.3	1021.8	1023.4	1020.3	3.1	82	4.4	7.1	0	9.3	16
1402	2019-11-02	16.6	23.3	10.6	12.7	1019.1	1021.6	1016.8	4.8	83	3.2	6.4	0	0	17
1403	2019-11-03	18.2	23.9	14.9	9	1019.2	1021	1016.4	4.6	77.8	3.8	6.5	0	0	16
1404	2019-11-04	16	22.5	10.8	11.7	1022.2	1023.8	1020.9	2.9	80.5	3.8	6.6	0	5.6	33
1405	2019-11-05	14.6	21	9.6	11.4	1021	1023	1019	4	76	3.4	6.3	0	0	17
1406	2019-11-06	15.3	21.9	7.5	14.4	1017.4	1020.3	1014.9	5.4	78.5	2.9	4.9	0	0	15
1407	2019-11-07	16.4	20.5	13.8	6.7	1018.9	1021.8	1015.5	6.3	75.5	4.4	6.8	0	0.2	16
1408	2019-11-08	13.3	19.4	9.4	10	1023.4	1025.5	1021.8	3.7	76.3	4.4	7.8	0	9.4	19
1409	2019-11-09	11.5	19.9	5.3	14.6	1023.3	1025.6	1021.2	4.4	80	3.2	7.4	0	10.1	18
1410	2019-11-10	13.9	22	6.2	15.8	1016	1022	1011.4	10.6	73.3	5.4	8.9	0	9.4	23
1411	2019-11-11	13.6	23.1	6.4	16.7	1016.8	1018.7	1014	4.7	72	2.8	5.5	0	9.8	17
1412	2019-11-12	15.8	19.9	8.2	11.7	1018.9	1020.7	1017.8	2.9	80.5	4.6	8.2	0	0.1	8
1413	2019-11-13	17.5	20.2	15.8	4.4	1020.9	1024.9	1017.1	7.8	76.3	5.5	9.6	0.3	0.8	13
1414	2019-11-14	11.9	18	5.7	12.3	1025.2	1027.7	1022.6	5.1	62.8	4.4	7.6	0	9.6	13
1415	2019-11-15	15.8	20.7	6.7	14	1018.9	1022.6	1016.7	5.9	65	4	7.3	0	10	14
1416	2019-11-16	18.3	23.5	10.4	13.1	1015.7	1017.4	1014.2	3.2	71	3.5	6.4	0	9.4	22
1417	2019-11-17	20.5	25.5	15.6	9.9	1014.4	1016.2	1012.2	4	67.8	4	7.8	0	5	25
1418	2019-11-18	11.8	20.2	9.1	11.1	1025.5	1028.1	1016.3	11.8	80	6.6	13.4	1.1	0	14
1419	2019-11-19	7.5	14.3	2.8	11.5	1029	1030.4	1027.3	3.1	62.3	3.7	8	0	9.4	18
1420	2019-11-20	9.1	17	3.1	13.9	1029.2	1031	1027.6	3.4	76.3	3.6	9.9	0	7	14
1421	2019-11-21	12.9	18.4	6.9	11.5	1025.5	1029	1023.3	5.7	77	2.8	5.5	0	0.1	9
1422	2019-11-22	15.5	22.2	9.1	13.1	1021.3	1024.5	1019.4	5.1	91	3.7	6.7	0	1	15
1423	2019-11-23	17.9	21.2	14.1	7.1	1018.9	1020.6	1017	3.6	98	4.9	8.1	2	0.3	12
1424	2019-11-24	18.9	23.4	15	8.4	1020.7	1025.9	1017.2	8.7	87	7.9	14.5	0	0.8	15
1425	2019-11-25	9.7	15	7.1	7.9	1031.7	1033.8	1025.8	8	68.3	6.6	12.1	0	0	9
1426	2019-11-26	9.1	12.2	6.4	5.8	1029.5	1032.6	1027.3	5.3	78	3.4	6	0.2	0	8
1427	2019-11-27	9.1	9.9	8.3	1.6	1028.4	1030.4	1026.6	3.8	93.5	4.6	8.5	9.3	0	11
1428	2019-11-28	9.1	11.8	7.1	4.7	1031.8	1034.1	1030.3	3.8	71	5.4	9.8	1.8	0	15
1429	2019-11-29	8.9	12.6	5.7	6.9	1031	1032.8	1029.2	3.6	72.5	4.9	8	0	0	17
1430	2019-11-30	10.8	13.8	8	5.8	1025.9	1030.2	1023.4	6.8	92.3	3.6	6.1	4.5	4.6	17
1431	2019-12-01	9.4	11.8	7.3	4.5	1022.6	1025.4	1020.1	5.3	90.3	6.4	12.7	16	4.6	15
1432	2019-12-02	5.8	10.3	1.5	8.8	1029.1	1030.4	1025.4	5	70	6.1	11.8	0	4.6	13
1433	2019-12-03	3.2	10.9	-1.6	12.5	1029.8	1031.5	1028.5	3	81.5	3.7	5.9	0	4.6	18
1434	2019-12-04	4.6	12.9	-1.5	14.4	1031.2	1032.8	1029.9	2.9	75	3.3	6	0	4.6	9
1435	2019-12-05	6.6	13.6	1.4	12.2	1033.2	1035.6	1031.9	3.7	77.5	4.2	7.4	0	4.6	14
1436	2019-12-06	7.3	11.3	1.8	9.5	1034.7	1036.2	1033.4	2.8	63	4.9	9.3	0	4.6	9
1437	2019-12-07	3.2	11	-2.4	13.4	1032.4	1034.3	1030.9	3.4	78.8	3.4	5.9	0	4.6	21
1438	2019-12-08	3.1	12.9	-2.9	15.8	1029.4	1032.5	1027.2	5.3	78	2.8	5.1	0	4.6	19
1439	2019-12-09	5.7	16.6	-1.5	18.1	1023.7	1027.7	1021.3	6.4	80.8	3.2	5.5	0	4.6	11
1440	2019-12-10	8.4	18.9	1	17.9	1019.6	1022.9	1017.3	5.6	79	3.2	6.4	0	4.6	13
1441	2019-12-11	7.3	15.6	3.4	12.2	1022	1025.2	1018.7	6.5	79	4.4	8	0	4.6	20
1442	2019-12-12	6.4	14.4	-0.6	15	1028.1	1030.3	1025.3	5	75	3.8	5.9	0	8.9	14
1443	2019-12-13	9	16.4	2.7	13.7	1025.2	1028.7	1022.8	5.9	82.5	5.1	7.7	0	9.2	7
1444	2019-12-14	8.9	16.5	2.5	14	1026.5	1029.4	1024.5	4.9	84.5	4.5	7.9	0	5.6	16
1445	2019-12-15	12.5	17.3	8.7	8.6	1023.9	1026.6	1021.5	5.1	86	5.6	9.2	0	5.3	12
1446	2019-12-16	15.8	21.6	11.9	9.7	1017.4	1022.2	1014.2	8	89.5	4.4	8.1	0	7.9	8
1447	2019-12-17	13.2	15.2	10.1	5.1	1019.1	1023.4	1015.2	8.2	88.5	4.4	7.3	4.2	0	14
1448	2019-12-18	8.3	10.1	7.2	2.9	1026.8	1028.9	1023.4	5.5	83	4.2	7.1	1.3	0	14
1449	2019-12-19	5.3	7.2	3.8	3.4	1028.8	1030.4	1026.8	3.6	88.5	4.8	8.3	1.9	0	9
1450	2019-12-20	6.1	10.4	1.7	8.7	1028.8	1030.6	1026.7	3.9	87.3	4.4	7.4	2.7	2.1	14
1451	2019-12-21	8.6	10	6.8	3.2	1023	1028.7	1020.3	8.4	96.3	5.1	8.8	16.6	0	7
1452	2019-12-22	10.1	12.3	8.5	3.8	1019.1	1020.7	1017.4	3.3	91.3	3.3	5.8	27.9	0	16
1453	2019-12-23	8.6	13.6	3.4	10.2	1022	1023.5	1020.6	2.9	89.3	3.8	7.5	0.1	3.9	15
1454	2019-12-24	10	11.4	9.6	1.8	1023.6	1025.7	1022.6	3.1	97	4.2	7.5	10.9	0	7
1455	2019-12-25	12.2	14.7	9.7	5	1018.2	1023.7	1014.4	9.3	95	2.7	5.1	4.1	0	6
1456	2019-12-26	9.2	13.5	6.2	7.3	1021.5	1027.5	1015	12.5	87.3	6.7	13.5	4.9	0	9
1457	2019-12-27	3.1	8.7	-0.6	9.3	1028.2	1029.8	1026.5	3.3	79.8	5.1	8.9	0	5.9	13
1458	2019-12-28	6.1	12	-1.9	13.9	1025.3	1028.1	1023.2	4.9	84.8	4.5	8.2	0	6.8	19
1459	2019-12-29	13	15.9	11.2	4.7	1020.4	1024	1018.8	5.2	76	3.7	7.5	0	0.1	15
1460	2019-12-30	9.8	14	7.5	6.5	1026.3	1031.2	1021.4	9.8	81.3	6.4	10.9	0	4.7	17
1461	2019-12-31	3.6	9.2	0.2	9	1036.9	1040	1031.2	8.8	61.8	6.9	13	0	6.2	13
1462	2020-01-01	3.2	9.6	-2.5	12.1	1032.3	1036	1029.8	6.2	84.5	4	6.2	0	6.8	8
1463	2020-01-02	10.6	13.3	4.4	8.9	1027.9	1030.2	1026.5	3.7	78.5	3.8	6.8	0.1	0	13
1464	2020-01-03	9.5	10.4	9.2	1.2	1026.4	1028.6	1024.9	3.7	95.5	2.4	3.9	2	0	13
1465	2020-01-04	9.4	10.3	8.6	1.7	1026	1027.1	1024.4	2.7	94.8	2.6	4.8	2.5	0	4
1466	2020-01-05	11.8	13.8	9.1	4.7	1025.6	1027.8	1023.3	4.5	81.5	5.8	10	0	0	12
1467	2020-01-06	16.8	22.9	13.1	9.8	1019	1023.9	1016.1	7.8	82.8	5.2	8.8	0	7.8	20
1468	2020-01-07	12.3	19.4	7.5	11.9	1014.4	1019.9	1010.8	9.1	89.3	8.2	14.9	0	2.5	7
1469	2020-01-08	4.9	7.8	1.5	6.3	1026.9	1029.7	1019.9	9.8	74.3	7.3	14.7	0	2.1	13
1470	2020-01-09	5.1	6.7	1	5.7	1025.5	1028.4	1023.1	5.3	88.3	3.8	7.9	2.4	0	15
1471	2020-01-10	7.9	8.7	6.1	2.6	1021	1024.2	1018.8	5.4	96.5	4.2	7.7	15.7	0	6
1472	2020-01-11	6.8	8	6	2	1020.6	1022.5	1019.1	3.4	97.3	3.8	7.1	9.3	0	6
1473	2020-01-12	4.5	7.9	1.3	6.6	1023.8	1025.9	1022	3.9	81.3	4.5	8.1	0.1	3	21
1474	2020-01-13	3.4	9.8	-1.9	11.7	1023.9	1026	1021.8	4.2	84.3	2.6	4.4	0	1.1	13
1475	2020-01-14	4	7.8	0.3	7.5	1026.7	1029	1023.6	5.4	84.8	4.5	8.6	0	0.6	12
1476	2020-01-15	3.2	8.2	-2.2	10.4	1026.6	1029	1024.5	4.5	91	3.6	6.3	6.5	0	10
1477	2020-01-16	6.3	7.4	5.7	1.7	1023.9	1025.4	1022.1	3.3	96.5	5.2	8.2	15.6	0	18
1478	2020-01-17	5	6.1	4.1	2	1026.3	1028	1025.1	2.9	90.3	3.8	7	1.7	0	9
1479	2020-01-18	4.2	5.2	3.7	1.5	1026	1027.9	1024.3	3.6	76.5	3.4	5.7	0	0	15
1480	2020-01-19	4.4	9.1	0.8	8.3	1024.6	1026.2	1023	3.2	74.8	3.9	6.6	0	3	10
1481	2020-01-20	3.1	11.2	-1.5	12.7	1025.9	1028	1024.3	3.7	82.8	4	6.9	0	7.8	18
1482	2020-01-21	5.5	11.3	-0.9	12.2	1025.6	1028.5	1022.7	5.8	89	4.4	7.3	1.6	2.7	11
1483	2020-01-22	9.5	11.4	8.7	2.7	1020	1022.9	1017.8	5.1	93	3.2	5.7	10	0	14
1484	2020-01-23	8.6	10.2	7.8	2.4	1022.9	1025.5	1020.7	4.8	98.3	2.9	6.4	24.2	0	15
1485	2020-01-24	8.3	10	7.3	2.7	1027.6	1029.3	1025.1	4.2	93.3	4.5	8	11.7	0	10
1486	2020-01-25	7.3	8.2	6.7	1.5	1026.5	1029.6	1023.5	6.1	97.3	4.7	7.3	30	0	7
1487	2020-01-26	8.5	9.4	6.7	2.7	1020.1	1025.7	1016.8	8.9	97.5	4.9	9.7	25.9	0	7
1488	2020-01-27	5.9	7.8	5.3	2.5	1019.5	1021.1	1017.6	3.5	93.8	4.7	9.2	11	0	11
1489	2020-01-28	4.8	6.7	3.5	3.2	1022.5	1024.2	1021	3.2	80.3	4.8	8.6	0	0	7
1490	2020-01-29	5.9	9.1	3.3	5.8	1023	1024.7	1021.3	3.4	69.5	7	13.3	0	4.9	7
1491	2020-01-30	4.6	7.2	2.2	5	1022.9	1024.4	1021.2	3.2	64	6.7	13.3	0	2.3	6
1492	2020-01-31	2.5	9.9	-1.4	11.3	1025.7	1027.5	1024.1	3.4	75.3	5	8.7	0	9.4	7
1493	2020-02-01	2.7	12.1	-3.8	15.9	1027.1	1028.6	1025.9	2.7	79.3	2.9	4.9	0	10.1	9
1494	2020-02-02	5.9	11.6	-1.3	12.9	1025.6	1027.6	1023.2	4.4	82	3.8	6.2	0	2.5	11
1495	2020-02-03	7.7	13	5.5	7.5	1027.1	1029	1024.8	4.2	79	4.9	7.6	0	5.4	7
1496	2020-02-04	5.7	12.4	1	11.4	1026.1	1028.8	1023.9	4.9	84	3.2	5.3	0	0.8	4
1497	2020-02-05	5	12.7	-1.4	14.1	1029.3	1031.8	1026.2	5.6	78.8	4.8	8.5	0	7	9
1498	2020-02-06	4.6	7.3	3.2	4.1	1029.9	1032.3	1027.5	4.8	83	5.1	9.2	7.2	0	6
1499	2020-02-07	6.2	8.5	4.3	4.2	1028.6	1030	1027.4	2.6	89.3	3.3	6.3	5.7	0	2
1500	2020-02-08	7.1	9.7	4.9	4.8	1031	1032.5	1029.7	2.8	76.8	3.6	6.2	0	0	7
1501	2020-02-09	4.2	11.3	-0.8	12.1	1030	1032.7	1027.4	5.3	84	4.1	6.7	0	7.2	8
1502	2020-02-10	7.9	15.5	-0.4	15.9	1025.1	1027.8	1023.1	4.7	71.5	3.6	6.3	0	6.1	15
1503	2020-02-11	10.2	11.6	8.3	3.3	1021.6	1024.9	1018.3	6.6	93.8	4.8	8.9	10	0	6
1504	2020-02-12	11.7	16.1	10.2	5.9	1018.1	1019.3	1016.8	2.5	89.3	3.3	6	2.7	1	8
1505	2020-02-13	12.1	15.6	8.8	6.8	1017	1019.2	1014.4	4.8	94.3	5.3	7.7	4.3	0.1	7
1506	2020-02-14	12.9	14.4	11.3	3.1	1015.8	1017.5	1013.7	3.8	98.8	4.9	8.7	0.4	0	9
1507	2020-02-15	9.5	14.1	3.2	10.9	1019.8	1024.2	1016	8.2	96.3	7.2	14.3	10.2	0	8
1508	2020-02-16	2.6	5.7	0.5	5.2	1027.5	1029.7	1024.1	5.6	61.8	7.2	13.3	10.2	7	5
1509	2020-02-17	3.7	9.5	-1.1	10.6	1030.5	1031.6	1028.4	3.2	52.3	8.3	16.2	0	10.4	5
1510	2020-02-18	3.3	10.9	-3.1	14	1031.4	1034.1	1029.4	4.7	67	3.4	6.9	0	10.4	12
1511	2020-02-19	6.3	11.4	-1.5	12.9	1027.5	1030.8	1025.3	5.5	72.8	4.6	8	0	3.3	8
1512	2020-02-20	8.7	14.6	1.1	13.5	1030.2	1032.1	1027.2	4.9	84	4.7	7.3	0	10.5	10
1513	2020-02-21	11.3	17	6.5	10.5	1028.6	1032.6	1025.7	6.9	76.3	5.3	9	0	5.7	15
1514	2020-02-22	10.5	17.1	4.5	12.6	1031.6	1033	1029.3	3.7	67.8	4.3	8	0	9.7	10
1515	2020-02-23	8.9	13.5	2.7	10.8	1029	1033.1	1025.2	7.9	69.5	5.9	10.1	0	9.5	13
1516	2020-02-24	14.7	21.1	9.4	11.7	1019.2	1025.4	1015.2	10.2	68.5	4.5	8.1	0	9.6	15
1517	2020-02-25	18.9	26.3	13.4	12.9	1015.4	1018.1	1013.4	4.7	72.8	6.1	9.2	0	6.9	16
1518	2020-02-26	10.2	16.8	9.4	7.4	1024.4	1027.7	1018.2	9.5	87.3	4.8	8.3	5.5	0	8
1519	2020-02-27	9.7	13.9	7.1	6.8	1027.4	1029.6	1025.1	4.5	72.3	4.9	7.8	0	7.5	13
1520	2020-02-28	11	14.2	8.3	5.9	1018.2	1026	1015.8	10.2	81.5	5.3	9.8	0	0	4
1521	2020-02-29	9.9	11.3	8.8	2.5	1016.9	1018.8	1015.3	3.5	93.8	2.6	4.6	5.2	0	8
1522	2020-03-01	10.1	11.3	9.4	1.9	1019.7	1023.3	1015.9	7.4	93	4.3	7.6	4.1	0	12
1523	2020-03-02	8.6	11.1	6	5.1	1025.8	1027.7	1023.4	4.3	72	3.8	6.6	0	2.5	11
1524	2020-03-03	8.9	12.3	7.2	5.1	1023.9	1026.7	1022.1	4.6	71.3	3	5	0	0	10
1525	2020-03-04	9.2	12.6	7.4	5.2	1026.6	1028.9	1024.2	4.7	68	3.6	6.5	0	0	11
1526	2020-03-05	7.2	12.3	0.2	12.1	1027.5	1030.4	1025	5.4	58.5	4.5	8.1	0	10.7	9
1527	2020-03-06	9.4	13.5	4	9.5	1019.2	1025.3	1015.5	9.8	72.3	5.4	9.3	0.1	7.1	11
1528	2020-03-07	11.5	16.7	8.9	7.8	1015.3	1016.9	1013.7	3.2	87.5	4	7.5	0	0.7	10
1529	2020-03-08	10.4	14.1	5.3	8.8	1015.5	1018.3	1012.3	6	89.5	6.4	10.1	0	0.4	11
1530	2020-03-09	12.8	14.8	11.9	2.9	1007.3	1012.9	1004.2	8.7	97	6.6	12.2	22.6	0	13
1531	2020-03-10	9.9	13.6	7	6.6	1017.5	1020.9	1008.7	12.2	81.5	6.7	12.4	1.8	1.3	4
1532	2020-03-11	9.2	16.3	2.7	13.6	1021.8	1023.2	1020.1	3.1	82	3.6	5.7	0	5.2	12
1533	2020-03-12	12.4	15.2	8.9	6.3	1018.6	1022	1016.3	5.7	76.3	5.5	10	6.6	1.9	13
1534	2020-03-13	11.6	13.1	10.6	2.5	1020.5	1023.7	1017.7	6	95.3	3.5	6.9	3.2	0	12
1535	2020-03-14	9.2	14.6	5.1	9.5	1022.6	1025.2	1019.2	6	72.5	4.5	7.9	0	8.1	17
1536	2020-03-15	11.5	19.5	4.3	15.2	1019.8	1021.6	1017.3	4.3	64.8	5.4	10.2	0	10.8	12
1537	2020-03-16	12	14.8	6.6	8.2	1023.8	1026.5	1019.4	7.1	54	5	9.1	0	8.4	12
1538	2020-03-17	15.6	23.4	11.1	12.3	1018.5	1023.1	1015.7	7.4	59.3	4	6.6	0	9	20
1539	2020-03-18	16.8	24.2	9	15.2	1014.4	1017.4	1011.2	6.2	66.5	4.2	6.7	0	10.6	9
1540	2020-03-19	15	21.6	8.6	13	1014.5	1018.7	1010.4	8.3	57	6.4	11.4	0	9.7	17
1541	2020-03-20	13	18.6	4.7	13.9	1016.4	1020.1	1012.6	7.5	55.5	5.9	9.4	0	11.1	10
1542	2020-03-21	16.8	25.2	8.6	16.6	1011.6	1014.2	1007.7	6.5	74.3	3.8	6.2	2.3	8.4	17
1543	2020-03-22	17	22.3	14.3	8	1013.9	1017.9	1008.8	9.1	78.8	5	8.5	18.1	2.9	15
1544	2020-03-23	12.6	18.3	6.3	12	1020.3	1022.2	1018	4.2	61	4.7	8.1	0	6.6	13
1545	2020-03-24	13.5	18.1	6.9	11.2	1019.4	1021.2	1017.4	3.8	64.5	5.5	8.9	0	6.2	15
1546	2020-03-25	16.7	21.8	12.8	9	1013.7	1018.4	1010.4	8	75.8	6.2	10.3	0.2	5.6	14
1547	2020-03-26	20.1	25.7	16.4	9.3	1010.4	1013.4	1008	5.4	90.8	4.8	8.2	11.5	0.6	12
1548	2020-03-27	13.1	19.9	10	9.9	1018.7	1022.6	1010.6	12	78.3	6	11.3	25.5	0	13
1549	2020-03-28	6.1	10	5.2	4.8	1024.4	1025.8	1021.8	4	92.3	4.5	8	23.4	0.8	7
1550	2020-03-29	6.8	9.1	3.9	5.2	1021.2	1025.9	1018.3	7.6	90.5	3.1	6.2	7.9	0	7
1551	2020-03-30	9.7	12.1	7.4	4.7	1018.4	1019.6	1017.5	2.1	97	3.5	7.5	22.5	0	9
1552	2020-03-31	10.9	15.1	8.1	7	1017	1019.6	1014.2	5.4	92.5	3.9	6.8	0.8	2	8
1553	2020-04-01	12	17.8	8.2	9.6	1020.7	1022.8	1016	6.8	78.8	4.6	8.1	0	6.9	11
1554	2020-04-02	10.8	15.7	3.8	11.9	1023.3	1024.9	1021.1	3.8	73	4.3	7.1	0	6.4	14
1555	2020-04-03	13.2	17.1	10.5	6.6	1022.6	1024	1021.1	2.9	64	3.2	6.1	0	4.4	20
1556	2020-04-04	12.8	20.3	6.2	14.1	1023.7	1025.2	1021.8	3.4	69.3	3.9	7.7	0	5.3	20
1557	2020-04-05	10.2	16.1	3.1	13	1025.8	1028.4	1023.6	4.8	66.3	4	6.5	0	9.7	18
1558	2020-04-06	9.1	14.3	3.2	11.1	1022.3	1025.9	1019.6	6.3	78.3	3.1	5.1	0	0.4	15
1559	2020-04-07	10.4	20.5	2.8	17.7	1019.3	1021.3	1018.1	3.2	76.3	3.5	5.9	0	11.2	15
1560	2020-04-08	13.4	21.8	3.2	18.6	1019	1019.9	1017.8	2.1	64.8	4.7	7.9	0	11.4	16
1561	2020-04-09	15.2	19.7	11.8	7.9	1020.3	1021.5	1018.9	2.6	71.3	5.6	9.1	0	11.1	11
1562	2020-04-10	15.2	18.8	12.2	6.6	1021.3	1023.5	1019.2	4.3	84.3	6.6	10.9	0	5.1	6
1563	2020-04-11	12.2	15.1	9.3	5.8	1018.8	1020.7	1017.2	3.5	91.5	5.9	9.9	5.7	0	8
1564	2020-04-12	11.3	18.3	7.2	11.1	1017.8	1020.7	1013.6	7.1	75.8	9.8	16.6	3.7	9.7	15
1565	2020-04-13	12.2	19.1	7	12.1	1018.9	1020.7	1015.5	5.2	67.3	5.6	10.3	0.8	11	18
1566	2020-04-14	13.6	19.3	4.7	14.6	1017.5	1020.4	1014.8	5.6	71.8	3.5	5.9	0	5.8	15
1567	2020-04-15	17.6	24.4	12.4	12	1013	1016	1011.4	4.6	57.8	4.9	8.6	0	8.2	14
1568	2020-04-16	19.5	24.7	12.9	11.8	1011.6	1013.6	1008.9	4.7	58.5	5.1	8	0	7.4	20
1569	2020-04-17	19.6	21.8	16.3	5.5	1012	1015	1008.4	6.6	64	4.9	8.5	0	0	22
1570	2020-04-18	15.8	19	14.1	4.9	1017.2	1020	1014.8	5.2	75.5	4.5	8.9	0.2	0	17
1571	2020-04-19	15.2	17.9	13	4.9	1011.1	1016.5	1008.8	7.7	84	7.9	14.7	11.4	0.3	21
1572	2020-04-20	16.8	22.5	10.1	12.4	1016.1	1017.6	1013.5	4.1	70.8	3.4	5.8	0	7.3	21
1573	2020-04-21	12.7	16.7	9.9	6.8	1019.8	1022	1015.9	6.1	75.5	4.1	7.5	6.6	0	6
1574	2020-04-22	14.2	18.6	10.2	8.4	1021.3	1023.1	1019.4	3.7	73.5	3.5	8.6	0.3	5.4	8
1575	2020-04-23	15	19.6	12.2	7.4	1022.5	1024.1	1020.4	3.7	61.5	3.9	6.9	0	5.4	15
1576	2020-04-24	15.8	22.5	9.5	13	1019.8	1022.3	1017.1	5.2	53.8	5.1	8.5	0	11.4	21
1577	2020-04-25	18.9	25.7	12.1	13.6	1015.7	1018.6	1013.2	5.4	53	5.3	8.9	0	11.2	12
1578	2020-04-26	17	23.6	13.9	9.7	1016.8	1018.3	1015	3.3	75.8	4.6	7.5	0	8.5	13
1579	2020-04-27	16	21	13.2	7.8	1021.1	1024.1	1017.3	6.8	61.3	5	9	0.1	2.1	12
1580	2020-04-28	14.4	20.5	5.7	14.8	1022.2	1025.4	1019.2	6.2	66	5.8	10.4	0	12.3	16
1581	2020-04-29	18.7	23.7	14.3	9.4	1016.4	1019.8	1014.2	5.6	66.3	5.1	9	0	11.7	10
1582	2020-04-30	23	29.6	15.1	14.5	1012.9	1015.3	1010.7	4.6	68.3	4.1	7	0	11.5	21
1583	2020-05-01	21.6	24.5	20.6	3.9	1011.1	1013.8	1009.4	4.4	83.8	4.1	6.8	0.4	0	26
1584	2020-05-02	23.4	28.8	19.7	9.1	1005.6	1010.4	1002.1	8.3	76.8	6.1	10.5	2.9	8.4	17
1585	2020-05-03	26.1	34.3	21.1	13.2	1003.5	1005.2	1001.9	3.3	72.5	4.4	8.2	0	10.6	27
1586	2020-05-04	23.9	29.6	19.2	10.4	1008.1	1010.6	1003.8	6.8	77.5	4.3	7.2	0	10	25
1587	2020-05-05	18.7	21.1	17.6	3.5	1006.7	1011.1	1004.2	6.9	96.8	5.3	9.2	11	0	16
1588	2020-05-06	18.7	22	16.5	5.5	1011.2	1012.8	1006.7	6.1	86.8	4	6.7	0	0	17
1589	2020-05-07	19.5	22.9	17.6	5.3	1011	1013	1008.8	4.2	83.8	6.4	11.1	0	3.3	13
1590	2020-05-08	22.6	26.6	19.1	7.5	1005.1	1009.9	1001.6	8.3	86.8	6.3	11.7	0	1.5	13
1591	2020-05-09	21.4	24.2	20.4	3.8	1006.9	1008.6	1002.9	5.7	86	4.5	8.1	0.3	0	21
1592	2020-05-10	18.2	22.5	16.5	6	1011.8	1013.1	1008.5	4.6	90	3	5	20.8	0	20
1593	2020-05-11	20.4	26.1	14.6	11.5	1011.4	1014	1008.9	5.1	80.3	3.4	5.8	0	2.1	14
1594	2020-05-12	21.4	28.8	16.4	12.4	1011.7	1012.6	1009.5	3.1	50.8	4.9	9	0	11.8	22
1595	2020-05-13	20.8	26.1	15.8	10.3	1015.7	1017.8	1012.6	5.2	60	5.6	9.2	0	11.8	16
1596	2020-05-14	21.9	25.5	18.8	6.7	1009.8	1015.2	1004.5	10.7	75.5	6.4	11.7	0.5	1.7	12
1597	2020-05-15	24.3	29.4	21.2	8.2	1005.6	1006.5	1004	2.5	84.8	5.4	9.9	7.8	2.2	16
1598	2020-05-16	23.4	27.4	21.7	5.7	1006.3	1007.9	1004.5	3.4	93.3	3.9	6.4	1.2	0.1	22
1599	2020-05-17	23.2	28	21	7	1003.1	1006.6	1001	5.6	94.8	3.3	6.4	0.8	2.6	24
1600	2020-05-18	24.8	29.5	21.4	8.1	1000.9	1005.3	998	7.3	65.3	6.7	12.5	0	7.3	11
1601	2020-05-19	20.9	28.6	11.9	16.7	1007.2	1008.1	1005.3	2.8	54.3	4.7	8	0	10.2	19
1602	2020-05-20	22.6	29.5	15.2	14.3	1009.3	1010.5	1007.8	2.7	60.5	4.6	8.4	0	8.8	19
1603	2020-05-21	22	24.2	20.5	3.7	1010.1	1011.3	1008.8	2.5	76	6.4	11.2	0	0.6	15
1604	2020-05-22	21.1	24.1	18.8	5.3	1008.9	1010.7	1007	3.7	75	4.7	7.6	0	3.3	18
1605	2020-05-23	22.1	26.3	16.3	10	1008.7	1010	1006.6	3.4	82	4.9	8.9	0	8.4	24
1606	2020-05-24	24.8	29.9	19.6	10.3	1009.4	1011.2	1008	3.2	77.5	4.6	8.2	0	9.2	16
1607	2020-05-25	23.3	27.6	21.2	6.4	1011.5	1012.6	1009.9	2.7	80.5	4.1	6.9	0	2.1	5
1608	2020-05-26	19	21.7	16.8	4.9	1009.5	1012.1	1007.8	4.3	92.3	4.1	6.8	30.1	0	20
1609	2020-05-27	21.1	26.5	16.5	10	1010.9	1012.2	1009.4	2.8	80.3	3.1	5.8	0	1.3	25
1610	2020-05-28	24.6	30	20.1	9.9	1010.6	1011.7	1009.4	2.3	77	3.1	5.8	0	0.7	19
1611	2020-05-29	22.5	25.6	20.7	4.9	1012.3	1013.5	1011.2	2.3	81.5	3.9	6.3	1	0	14
1612	2020-05-30	18.4	20.7	15.4	5.3	1011.1	1015.1	1008.3	6.8	95	6.2	12.3	39.8	0	14
1613	2020-05-31	22.7	28.7	18.6	10.1	1010.6	1012.3	1008.5	3.8	84.5	3.6	6.4	0.2	3.7	10
1614	2020-06-01	25.1	29.4	21.4	8	1010.2	1012	1008.6	3.4	77.5	4.5	7.3	0	6.7	17
1615	2020-06-02	26.3	32	21.4	10.6	1005.9	1010.5	1003.2	7.3	71.8	4.3	7.4	0	7.7	22
1616	2020-06-03	24.6	27.6	21.5	6.1	1003.2	1005.2	1002.1	3.1	90.5	4.4	6.8	28.5	0.3	9
1617	2020-06-04	24.1	29.9	20.5	9.4	1004.2	1005.3	1002.6	2.7	93.8	3.3	5.5	0	2.8	11
1618	2020-06-05	22.9	25	21.2	3.8	1004.6	1006.2	1003	3.2	97.3	5.2	9.8	82.5	0	7
1619	2020-06-06	23.1	27.6	20.7	6.9	1006.5	1008.3	1003.5	4.8	87	4.6	8.8	0.3	4.1	18
1620	2020-06-07	22.3	26	17.6	8.4	1009.8	1011.3	1008.2	3.1	85	5.2	9.4	0	5.1	29
1621	2020-06-08	23.8	27.4	21.3	6.1	1009.6	1011	1008.8	2.2	87.3	5.4	8.8	0	5	18
1622	2020-06-09	25.2	29.2	22.7	6.5	1007.8	1010.4	1005.9	4.5	90.5	4.2	7.5	0	5.6	17
1623	2020-06-10	25.8	28.6	23.6	5	1004.8	1007.3	1002.9	4.4	93.3	3.3	5.5	3.2	0.1	10
1624	2020-06-11	26.5	30.4	24.5	5.9	1004	1005.1	1002.7	2.4	93.8	3.6	6.3	28.9	0.9	19
1625	2020-06-12	28.9	34.4	24.2	10.2	1002.3	1005	999.7	5.3	82.3	4.3	8.1	0	4.7	17
1626	2020-06-13	29.7	34	25.2	8.8	1003.5	1004.9	1001.2	3.7	78.5	4.3	7.9	0	3.2	26
1627	2020-06-14	29.7	33.9	26.2	7.7	1007.3	1009.6	1004.1	5.5	84.8	3.2	5.3	2.8	2.4	12
1628	2020-06-15	25.5	28.5	24	4.5	1007.4	1010.3	1006.4	3.9	98.5	5	8.5	33.5	0	15
1629	2020-06-16	24.4	25.4	23.4	2	1005.7	1007.8	1004.3	3.5	96.5	4.4	8.2	4.5	0	15
1630	2020-06-17	27.4	34.7	22.8	11.9	1001.6	1006	999.7	6.3	90	4	7.2	0.3	5.5	17
1631	2020-06-18	27.9	34.2	21.7	12.5	1000.9	1004.2	998.4	5.8	77.5	6.7	11.4	2.6	4.9	20
1632	2020-06-19	23.9	28	21.4	6.6	1007.7	1009.3	1003.8	5.5	82.5	3.7	6.5	6.5	3	19
1633	2020-06-20	21.4	23.7	20.1	3.6	1008.3	1010.1	1007	3.1	94	3.5	5.8	10.7	0	18
1634	2020-06-21	21	22.6	20.1	2.5	1004.9	1007.8	1002.7	5.1	98.3	4.4	8.1	50	0	18
1635	2020-06-22	22.7	24.2	19.9	4.3	1004.9	1005.8	1003.4	2.4	97.3	3.7	7.2	4.4	0	19
1636	2020-06-23	25.5	27.4	23.5	3.9	1002.7	1005.9	1001.1	4.8	93.8	3.9	6.8	0	0	16
1637	2020-06-24	25.1	27.6	24.1	3.5	1002.6	1003.4	1001.1	2.3	93.3	4.5	8.7	10.8	0	17
1638	2020-06-25	23.6	25.3	22.2	3.1	1004.1	1005.5	1002.7	2.8	96.8	3.4	6.3	59.7	0	17
1639	2020-06-26	26.5	32.3	21.7	10.6	1005.2	1006.1	1003.5	2.6	88.3	3.7	6.4	0	6.7	30
1640	2020-06-27	25.9	27.9	24.5	3.4	1003.4	1005.3	1002.6	2.7	94.8	4.1	7.9	15.3	0.1	28
1641	2020-06-28	26.3	29.6	24.6	5	1004.2	1005.7	1002.5	3.2	94	5.1	8.7	5.9	1.1	16
1642	2020-06-29	26.8	32.2	25.1	7.1	998.8	1003	996.8	6.2	92.3	8	13.9	11.1	0.1	17
1643	2020-06-30	25.3	30.7	21.3	9.4	1002	1003.6	999.6	4	79	3.2	6.8	0.5	9.3	24
1644	2020-07-01	25.1	28	22.4	5.6	1005.6	1007	1003.5	3.5	77.3	4.9	8.4	0	3.8	21
1645	2020-07-02	24.9	26.7	23.9	2.8	1006.6	1008.2	1005.8	2.4	87.3	5.4	9.5	0.1	0	15
1646	2020-07-03	26.4	30.8	23.6	7.2	1004.4	1007.9	1002.9	5	91.5	5	8.5	52.5	2.5	14
1647	2020-07-04	24.7	27	22.6	4.4	1007.3	1008.8	1005.5	3.3	85.8	3.3	5.4	0	0.1	18
1648	2020-07-05	25.1	27.1	22.7	4.4	1002.1	1006.9	999.5	7.4	98.5	2.8	4.3	17.1	0	19
1649	2020-07-06	25.8	27.8	24.9	2.9	1000.7	1001.9	998.8	3.1	98	6.2	10.9	17.1	0	16
1650	2020-07-07	27.9	32.5	25.7	6.8	1003.5	1005.1	1000.5	4.6	88	4.4	7.4	8.5	2.4	15
1651	2020-07-08	27.2	30.3	24.6	5.7	1002.9	1006.1	1000.8	5.3	87.8	3.9	6.2	0	1.2	22
1652	2020-07-09	25.9	28.9	24.7	4.2	998.5	1001.6	997.1	4.5	96.5	3.5	6.4	4.9	0.2	12
1653	2020-07-10	24.8	26.7	23.9	2.8	1001.9	1003.7	998.2	5.5	96.5	2.7	4.7	1.9	0	15
1654	2020-07-11	26	29.2	23.8	5.4	1004.6	1005.4	1003.6	1.8	95.8	3	5	7.8	0	15
1655	2020-07-12	29.9	35.7	25.4	10.3	1003	1005.6	1001.1	4.5	81	4.3	7.8	0	6.3	19
1656	2020-07-13	27.4	31.4	24.4	7	1004.3	1006.3	1002	4.3	85	4.6	8.3	0.1	1.2	10
1657	2020-07-14	24.6	26.1	23.3	2.8	1007.1	1008.2	1006.3	1.9	86.3	2.6	4.4	0	0	6
1658	2020-07-15	21.3	24.5	19.7	4.8	1005.8	1008	1003.9	4.1	97.8	4	8.9	40.8	0	16
1659	2020-07-16	21.8	24.6	20.4	4.2	1005.5	1007.1	1003.6	3.5	94.3	3.6	7	73.3	0.3	12
1660	2020-07-17	23.4	25	20.7	4.3	1005.8	1007.5	1004.5	3	93.8	4.3	7.6	0.2	0	18
1661	2020-07-18	28.2	33.6	24.5	9.1	1002.5	1005.9	1001.2	4.7	88.3	3.5	6.7	0.1	0.4	26
1662	2020-07-19	29.4	34	27	7	1001.2	1003.2	999.5	3.7	82.3	4.8	9.1	0	1.9	24
1663	2020-07-20	25.3	28	24.3	3.7	1007.8	1009.3	1003.2	6.1	94.8	2.9	5.5	0.1	0	14
1664	2020-07-21	28.3	33	24.5	8.5	1009.5	1010.7	1008.4	2.3	87	2.5	4.3	0.1	3	16
1665	2020-07-22	29.8	34.1	24.7	9.4	1007.1	1010.7	1004.8	5.9	81.8	3.5	6.6	0	8.8	21
1666	2020-07-23	30.7	36.2	27.8	8.4	1004.2	1005.4	1003	2.4	72.3	5.8	11.1	0	6.1	26
1667	2020-07-24	25.1	29.3	23.2	6.1	1007.1	1008	1005.4	2.6	88.8	4.3	8	11.8	0.2	15
1668	2020-07-25	26.4	31.1	21.7	9.4	1006.5	1008.7	1003.8	4.9	79	3.6	6	0	8.6	21
1669	2020-07-26	26.4	30.9	22.4	8.5	1005.2	1007	1003.5	3.5	84	4	7.1	0	3.1	26
1670	2020-07-27	28.4	32	26.1	5.9	1004.3	1005.4	1001.9	3.5	84.5	3.2	5.3	0	0.7	25
1671	2020-07-28	29.5	34.3	25.9	8.4	1006.6	1007.9	1005.3	2.6	87.5	5.8	12	1.4	4.3	21
1672	2020-07-29	29.5	33.4	26.9	6.5	1008.5	1009.5	1007.1	2.4	80.3	4.5	7.7	0	4.5	21
1673	2020-07-30	29.9	32.9	27.6	5.3	1010.5	1011.9	1009.2	2.7	78.5	5.5	9.1	0	9.4	20
1674	2020-07-31	29.3	31.9	27.9	4	1010.3	1011.6	1008.2	3.4	83.8	5.2	9.6	0	1.1	18
1675	2020-08-01	30.9	34.6	27.9	6.7	1008.3	1010.5	1006.7	3.8	74.3	5.1	8.6	0	12.5	13
1676	2020-08-02	31	34.5	27.7	6.8	1007	1008.7	1005.2	3.5	70.3	4.8	8.8	0	12.5	20
1677	2020-08-03	30.3	32.8	27.9	4.9	1006.6	1007.9	1005.3	2.6	72	7	11.6	0	12.7	15
1678	2020-08-04	28.1	31.1	26	5.1	1002.2	1006.2	998.2	8	85.5	9.9	18.5	12.4	3	13
1679	2020-08-05	27.5	30.3	25.2	5.1	1006	1007.2	999.5	7.7	89.3	10.4	18.3	263.5	0	26
1680	2020-08-06	30.4	34.3	27.7	6.6	1007.5	1008.9	1006	2.9	77.3	4.5	7.6	0	3.8	19
1681	2020-08-07	31.4	35.1	28.1	7	1004.7	1007.3	1003.1	4.2	75.8	3.9	6.7	0	4.2	13
1682	2020-08-08	30.4	33.9	27.7	6.2	1002.1	1004.7	1000.3	4.4	71.5	4.8	9	0	3.5	26
1683	2020-08-09	30.6	34.6	28.6	6	1000.2	1002.1	998.1	4	77	4.4	7.4	0	6.3	30
1684	2020-08-10	29.8	35.4	24.8	10.6	1001.2	1004.5	999	5.5	81.8	5.1	10.8	11.5	2.3	11
1685	2020-08-11	30.2	34.1	24.8	9.3	1006	1007.4	1003.3	4.1	75	4.5	7.4	0.6	3.1	22
1686	2020-08-12	31.2	35.4	28.7	6.7	1009	1010.4	1007.4	3	68.8	5.2	9.8	0	10.8	25
1687	2020-08-13	31.9	36.2	28.3	7.9	1008.3	1010.1	1006.1	4	68.5	4.1	7.5	0	12.6	12
1688	2020-08-14	32.5	37.3	28.8	8.5	1006.9	1008.3	1005.6	2.7	67.3	3.6	5.8	0	12	24
1689	2020-08-15	31.2	34.6	28.1	6.5	1006.8	1008.1	1005.3	2.8	68.8	4.9	8.5	0	12.6	12
1690	2020-08-16	31.1	35.3	27.8	7.5	1008	1008.9	1006.6	2.3	67.3	4.1	7.7	0	12.5	24
1691	2020-08-17	30.6	33.7	26.3	7.4	1010	1011.2	1008.4	2.8	68.8	5.4	9.4	0	12.2	18
1692	2020-08-18	30.1	32.8	27.3	5.5	1010.3	1011.5	1008.5	3	73.3	4.7	8.8	0	10.8	22
1693	2020-08-19	30.3	33.4	26	7.4	1009.1	1010.7	1006.9	3.8	74	5	9.9	0	12.1	26
1694	2020-08-20	30.2	33.4	26.1	7.3	1009.9	1010.5	1008.2	2.3	76	4.4	7.7	0	12.1	18
1695	2020-08-21	29.3	32.6	26.5	6.1	1010.9	1012	1010	2	77.5	4.9	8.8	0	10	15
1696	2020-08-22	29.3	32.7	26.2	6.5	1009.5	1011.3	1007.5	3.8	78	4.2	7.3	0	7.9	27
1697	2020-08-23	29.3	33.5	25.7	7.8	1006.1	1009	1003.5	5.5	76.3	4.5	7.6	0	11.7	29
1698	2020-08-24	29.9	34.6	25.4	9.2	1002.7	1005.1	1000.2	4.9	74.3	3.8	6.5	0	12.1	23
1699	2020-08-25	30.4	36.6	25.1	11.5	999.5	1002.3	997	5.3	73.8	5.2	8.7	0	9.5	7
1700	2020-08-26	30.3	33.8	28.1	5.7	996.6	998.9	994.9	4	72.3	7.4	14.1	0	5.9	15
1701	2020-08-27	28.9	33.7	25.9	7.8	1000.2	1002.3	998	4.3	78.3	5.7	10.4	1.2	3.2	16
1702	2020-08-28	27.2	32.2	24.5	7.7	1002.7	1004.2	1000.8	3.4	91.3	3.9	7	59.8	3.5	11
1703	2020-08-29	26.1	27.7	25.2	2.5	1005.3	1007	1003.1	3.9	94	3.7	6.8	39.5	0	12
1704	2020-08-30	28.7	32.6	24.6	8	1007.9	1009	1007	2	83.5	3.7	6.3	0	7.7	36
1705	2020-08-31	29.2	32.7	25.8	6.9	1008.3	1010	1006.5	3.5	78	4.5	7.4	0	11.3	13
1706	2020-09-01	29	33.2	25.9	7.3	1004.4	1008.1	1002.2	5.9	78.3	5	9	0	7.4	22
1707	2020-09-02	27.9	31.6	26	5.6	1002.5	1003.9	1000.6	3.3	81	6.6	15.3	0	5.2	11
1708	2020-09-03	25.5	31.3	22.1	9.2	1008.9	1011	1003.7	7.3	75	4	7.6	0	11.4	26
1709	2020-09-04	26.5	31.7	20.4	11.3	1011.3	1012.8	1009.9	2.9	64.8	3.8	6.5	0	8.3	10
1710	2020-09-05	25.9	31.2	19	12.2	1010	1011.5	1008.3	3.2	64	4.7	8.2	0	11.7	17
1711	2020-09-06	24.6	31.5	18.9	12.6	1006.3	1010.3	1004.1	6.2	71.5	5.5	11.1	0	11.6	24
1712	2020-09-07	26.4	33	20.8	12.2	1005.4	1007.7	1003	4.7	67.5	5.7	9.6	0	11	17
1713	2020-09-08	27.6	32.8	21.6	11.2	1010.5	1011.9	1007.7	4.2	65.5	5.2	8.8	0	11.1	18
1714	2020-09-09	26.9	31.8	21.9	9.9	1009.8	1012.3	1007	5.3	72	4.1	7.1	0	8.5	17
1715	2020-09-10	25.9	31.1	22.4	8.7	1006.9	1009	1005	4	83.5	5.8	11.2	9.4	4	14
1716	2020-09-11	23.2	25.1	20	5.1	1008.5	1011	1006.4	4.6	91	3.4	5.7	29.7	0	14
1717	2020-09-12	23.7	28.7	20.2	8.5	1013.3	1015.2	1011	4.2	86	4.9	8.4	0.1	1.3	27
1718	2020-09-13	23.9	29.2	20.2	9	1015.1	1016.4	1013.8	2.6	86	2.8	4.9	0.5	4.8	19
1719	2020-09-14	22.3	26.4	20.7	5.7	1013.9	1015.5	1012.4	3.1	95	4.2	7.1	15.4	0.3	15
1720	2020-09-15	22.2	23.5	20.7	2.8	1010.8	1014.2	1009.1	5.1	97.5	1.8	3.3	18	0	16
1721	2020-09-16	23.7	25.4	22.4	3	1009.6	1010.7	1008.1	2.6	94.3	2.3	4.6	3.2	0	10
1722	2020-09-17	20.9	24	18.1	5.9	1010.5	1013.7	1007.6	6.1	96.8	4.8	8.4	93	0	14
1723	2020-09-18	17.6	18.3	16.7	1.6	1017.5	1019.5	1013.8	5.7	96.5	3.7	6.6	12.9	0	12
1724	2020-09-19	19.7	23	17.7	5.3	1017.3	1019.1	1016.2	2.9	94.5	2.3	3.6	3.5	0	26
1725	2020-09-20	21.1	27.3	17.5	9.8	1016.7	1018.5	1015.6	2.9	81	3.7	6.3	0	5.1	22
1726	2020-09-21	21.7	27.2	18.5	8.7	1015.8	1017.3	1014.2	3.1	81	3.6	5.7	0	0.1	13
1727	2020-09-22	21.6	25.9	19.2	6.7	1014.3	1015.7	1013.4	2.3	82.3	4	7	0.2	0	9
1728	2020-09-23	19.5	21	18.7	2.3	1013.9	1014.7	1012.7	2	94.3	2.6	4.6	2.3	0	12
1729	2020-09-24	21	26.7	18.7	8	1013.4	1014.7	1011.5	3.2	82.3	4.1	8.3	0	6.5	10
1730	2020-09-25	21.2	26.7	16.2	10.5	1013.3	1014.6	1011.8	2.8	81	3.7	6.6	0	4.4	19
1731	2020-09-26	22.1	27.8	18	9.8	1014.3	1015.4	1013	2.4	83.3	3.4	5.7	0	3.2	23
1732	2020-09-27	21.8	27.1	17.3	9.8	1015.3	1016.7	1014.1	2.6	87.8	4.1	7.4	0	5.7	20
1733	2020-09-28	21.7	26.8	19.4	7.4	1014.3	1016.1	1012.4	3.7	85.3	3.7	6.5	0	3.9	21
1734	2020-09-29	22	26.7	18.2	8.5	1011.2	1013.9	1008.5	5.4	78.5	2.9	5	0	3.6	16
1735	2020-09-30	22.1	27.7	17.7	10	1011.6	1012.8	1010.4	2.4	76	4.4	7.8	0	7.9	17
1736	2020-10-01	21.2	26.9	16.4	10.5	1013	1014.9	1011.3	3.6	85	3.5	6.2	0	9.8	26
1737	2020-10-02	24	27.2	20.2	7	1013.1	1014.3	1011.6	2.7	78.3	3.9	6.9	0	10.3	23
1738	2020-10-03	23.5	25	22.1	2.9	1012.7	1014.4	1010.9	3.5	90.3	4.3	7.4	0	0	24
1739	2020-10-04	21.9	24.4	18.9	5.5	1012.5	1016.8	1008.9	7.9	90.8	7.2	14.7	8.4	0	26
1740	2020-10-05	18.4	23.4	14.6	8.8	1019.8	1021.6	1016.8	4.8	70.5	4.9	8.7	0.5	7.3	21
1741	2020-10-06	19.5	23.8	16.1	7.7	1021.5	1023	1020.1	2.9	63.3	4	8.6	0	4.6	14
1742	2020-10-07	19.9	23.6	17.6	6	1021.7	1023.1	1020.7	2.4	69.8	4.3	8.5	0	1.4	14
1743	2020-10-08	19.2	25.5	13.3	12.2	1021.8	1023	1020.5	2.5	75.8	4.6	8.1	0	9.4	13
1744	2020-10-09	19.4	25.2	14.7	10.5	1020.3	1022.3	1018.2	4.1	78.3	3.8	7.4	0	8.1	9
1745	2020-10-10	18.9	25.2	13.1	12.1	1018.1	1020	1016.2	3.8	81	3.5	6	0	6.8	12
1746	2020-10-11	19.5	25.7	13.8	11.9	1015.3	1017.6	1013	4.6	82	3.9	6.5	0	8.7	18
1747	2020-10-12	19.6	26.4	13.9	12.5	1016.8	1018.7	1015.2	3.5	77	3.2	6.1	0	9.3	18
1748	2020-10-13	18.9	24.7	14	10.7	1020.5	1021.8	1018.4	3.4	79.8	4.6	8.2	0	7.6	9
1749	2020-10-14	18.5	24.2	13.3	10.9	1022.5	1024.1	1021.1	3	76.8	4.2	8	0	1.7	13
1750	2020-10-15	18.9	22.1	16.5	5.6	1023.3	1025.1	1021.9	3.2	77.3	4.1	7.5	0.6	0.1	17
1751	2020-10-16	15.4	17.7	14.7	3	1022.5	1024.2	1021	3.2	97	3.8	6.8	7.6	0	13
1752	2020-10-17	17.6	22.5	12.8	9.7	1023.6	1024.9	1021.8	3.1	78.8	3.9	6.8	0.4	8.2	19
1753	2020-10-18	17.3	21.4	12.7	8.7	1023	1024.6	1021.9	2.7	78	3.1	5.9	0	1.8	16
1754	2020-10-19	17.1	21.2	14	7.2	1023.7	1025	1022.2	2.8	78	3.8	6.3	0	1.1	15
1755	2020-10-20	16.2	23.2	9.8	13.4	1023.1	1025.5	1020.8	4.7	83.3	4.1	8.7	0	9.4	14
1756	2020-10-21	16.9	19.4	13.5	5.9	1018.3	1021.8	1016.5	5.3	90	3.9	7.9	0	0	11
1757	2020-10-22	17.4	21.5	15	6.5	1017.2	1018.8	1015.6	3.2	77	4.1	7.8	0	0.2	13
1758	2020-10-23	14.4	20.1	9.2	10.9	1020.5	1021.6	1018.8	2.8	72.3	5.6	10.1	0	9.8	10
1759	2020-10-24	14	20.1	7	13.1	1022.9	1025.2	1021.5	3.7	70	2.9	5.3	0	7	21
1760	2020-10-25	14.1	20.5	7.2	13.3	1021.2	1023.5	1018.5	5	84.5	4.2	6.3	0	6.7	15
1761	2020-10-26	17.6	22.2	11.1	11.1	1018.5	1020.3	1016.9	3.4	88.3	4.3	7.5	0	3.9	17
1762	2020-10-27	17.2	22	12.5	9.5	1019.5	1021.2	1018	3.2	87	4.2	6.8	0	0.5	12
1763	2020-10-28	17.9	20.9	14.9	6	1022.7	1023.9	1020.7	3.2	84.5	3.1	5	0	0.1	15
1764	2020-10-29	18	21.5	15.6	5.9	1024	1025.5	1022.7	2.8	76	2.9	5.5	0	0.7	20
1765	2020-10-30	15.4	21.8	9.5	12.3	1025.4	1027.2	1023.9	3.3	75.8	3.3	6.4	0	7.3	14
1766	2020-10-31	14.9	21.7	9.1	12.6	1022.9	1025.9	1019.9	6	84	3.1	5.2	0	10.3	19
1767	2020-11-01	18.1	22.2	12.1	10.1	1019.5	1021.2	1018.1	3.1	87.8	2.6	4.3	0	0.1	24
1768	2020-11-02	17	21.8	13.1	8.7	1021.2	1022.7	1019.8	2.9	88.5	4.5	7.7	1.9	2.5	18
1769	2020-11-03	13.3	18.9	9.2	9.7	1024.6	1026.3	1021.9	4.4	75	5.1	9.2	0	9.4	11
1770	2020-11-04	13	19.1	6.6	12.5	1025.4	1027.6	1023.6	4	65.8	3.3	5.8	0	7.1	9
1771	2020-11-05	16.3	19.9	7.7	12.2	1023.1	1025	1020.9	4.1	79.3	5.3	9.3	0	4.4	14
1772	2020-11-06	18	24.9	11.8	13.1	1020.3	1022.5	1017.9	4.6	83.8	3.5	6	0	8.9	9
1773	2020-11-07	17.6	23.5	12.5	11	1021	1022.2	1019.6	2.6	79	3.5	6.8	0	3.1	13
1774	2020-11-08	15.8	22.2	9.4	12.8	1025.3	1027.4	1021.9	5.5	56.5	4.3	7.3	0	8.3	11
1775	2020-11-09	12.6	20	6.5	13.5	1026.6	1028.3	1025.2	3.1	77.8	3.6	6.8	0	9.7	15
1776	2020-11-10	11.7	19.8	5.8	14	1028.1	1029.4	1026.5	2.9	84.8	3	6	0	9	15
1777	2020-11-11	11.9	20.4	5.3	15.1	1029.8	1031.3	1028.7	2.6	86.3	3.6	6.2	0	7.3	8
1778	2020-11-12	14.1	21.5	6.8	14.7	1027.7	1030.3	1025.9	4.4	82.5	4.1	7.1	0	10.1	10
1779	2020-11-13	14.4	21.4	8.5	12.9	1027	1028.5	1025.9	2.6	84.5	3.5	6.1	0	8	10
1780	2020-11-14	14.7	21.7	8.4	13.3	1026.6	1028.2	1025	3.2	85.5	4.3	8	0	7.5	23
1781	2020-11-15	16.3	22.4	10.1	12.3	1024.3	1026.1	1022.5	3.6	88	3.5	6.7	0	8.2	10
1782	2020-11-16	18.1	22.7	12.5	10.2	1022.3	1024.1	1020.6	3.5	92.5	3.6	7.1	1.7	2.2	17
1783	2020-11-17	20.6	23.1	18	5.1	1018	1021.3	1015.7	5.6	93	4.8	8.1	0	1.2	10
1784	2020-11-18	23.3	28.8	19.8	9	1011.2	1016.3	1008	8.3	81.8	5.6	10.6	0	8.9	9
1785	2020-11-19	20.3	23.1	18.3	4.8	1011.5	1014.6	1007.5	7.1	79	4.9	8.8	0	3.1	12
1786	2020-11-20	14.6	18.5	13.8	4.7	1019.8	1022.4	1014.6	7.8	89.5	4.2	7.8	2.3	0	20
1787	2020-11-21	16	17.8	13.4	4.4	1019.2	1022.5	1017.4	5.1	82	4.3	7.8	0	0	15
1788	2020-11-22	13.3	18	11.2	6.8	1023.8	1029.1	1017.6	11.5	97	5.7	10.6	2.1	0	15
1789	2020-11-23	10.9	12.6	9.7	2.9	1028.7	1030.9	1026.1	4.8	80	4.1	8.5	0	0	19
1790	2020-11-24	10.1	11.1	9	2.1	1027.2	1029.1	1025.2	3.9	100	2.9	4.9	3.4	0	8
1791	2020-11-25	12.4	14	10.9	3.1	1024	1026.8	1021.6	5.2	100	2.6	4.7	13.4	0	7
1792	2020-11-26	11.7	13.4	11	2.4	1024.5	1026.7	1022	4.7	100	5	9.3	9.8	0	14
1793	2020-11-27	11.3	12.1	10.6	1.5	1029	1031.9	1026.1	5.8	97	4.1	7.7	3.1	0	11
1794	2020-11-28	9.4	11.5	7.7	3.8	1031.5	1033.5	1029.4	4.1	71.8	4.5	7.6	0	0.4	13
1795	2020-11-29	7.9	12.6	4.4	8.2	1031.2	1032.9	1029.6	3.3	75.5	3.9	6.9	0	8.8	15
1796	2020-11-30	8.8	14.1	4.4	9.7	1033.5	1035	1032	3	74.5	4.2	7.6	0	3	18
1797	2020-12-01	10.8	16	5.1	10.9	1031.8	1034.8	1028.8	6	74.5	4.9	8	0	4.5	8
1798	2020-12-02	9.8	13.6	5.2	8.4	1028.9	1030.5	1027.6	2.9	85	3.3	5.8	0	0	6
1799	2020-12-03	9	11.5	7.4	4.1	1031.1	1032.4	1029.8	2.6	77.3	6	10.5	0	2.4	13
1800	2020-12-04	5.5	9.9	2.5	7.4	1031.9	1033.5	1030.1	3.4	76	4.6	8.5	0	3.7	7
1801	2020-12-05	6	10.6	1.3	9.3	1030.5	1032.4	1028.9	3.5	81.5	3.3	5.9	0	2.1	14
1802	2020-12-06	10.2	14.7	3.2	11.5	1027.3	1030	1025.2	4.8	80.8	3.3	5.2	0	0	18
1803	2020-12-07	11	15.7	6.8	8.9	1028.1	1030.1	1026.7	3.4	83.8	4	6.4	0	2.3	12
1804	2020-12-08	9.6	11.9	7.9	4	1028.7	1030.4	1026.6	3.8	75.3	4.6	7.3	0	0	9
1805	2020-12-09	8.9	15.6	1.7	13.9	1024.3	1028.4	1021.6	6.8	84.3	3.5	6.1	0	8.5	12
1806	2020-12-10	11.1	13.6	10.2	3.4	1022.2	1023.6	1020.8	2.8	86.8	3.7	6.5	0	0.2	10
1807	2020-12-11	9.5	10.3	9	1.3	1021	1023.2	1019.2	4	96.8	2.3	3.9	0.2	0	12
1808	2020-12-12	6.7	11.9	3.2	8.7	1020.7	1023.1	1018.6	4.5	85.5	4.5	8.3	0	5.4	9
1809	2020-12-13	6.5	13.5	0.6	12.9	1020.9	1025.2	1018.5	6.7	74	6.1	11	0	7.1	7
1810	2020-12-14	3.4	8.1	2.1	6	1031	1032.8	1025.2	7.6	70.8	6.3	11.8	2.2	2.8	7
1811	2020-12-15	3.2	6.7	-0.6	7.3	1033	1034.9	1031.2	3.7	54.5	4.7	7.8	0	9.3	13
1812	2020-12-16	2.6	7.6	-1.5	9.1	1033.8	1036	1032.2	3.8	54.3	4.3	6.7	0	9.2	9
1813	2020-12-17	4.9	9.8	-1.5	11.3	1031.3	1033.8	1028.6	5.2	60.3	2.8	5.4	0	4.6	13
1814	2020-12-18	5.2	6.1	4.6	1.5	1030.3	1031.9	1028.8	3.1	89.8	3.3	6.4	2.1	0	10
1815	2020-12-19	4.7	9.1	0.5	8.6	1033.9	1035.3	1031.9	3.4	69.3	5.3	9.1	0	5.2	12
1816	2020-12-20	3.3	9.4	-0.5	9.9	1034.1	1035.2	1032.3	2.9	73.5	3.7	6.6	0	9.2	18
1817	2020-12-21	1.8	11.1	-4	15.1	1031.2	1034.2	1029	5.2	80.8	2.3	4.2	0	9.1	20
1818	2020-12-22	2.9	13	-3.7	16.7	1027	1030.1	1024.8	5.3	86.5	2.1	3.3	0	8.6	12
1819	2020-12-23	7	13.4	0.8	12.6	1021.8	1026.4	1017.9	8.5	91.3	2.8	4.1	0	0	11
1820	2020-12-24	7.5	13.3	2.9	10.4	1021.5	1024	1019.4	4.6	75.3	5.8	10.2	0	7.5	23
1821	2020-12-25	4.2	12.7	-1.7	14.4	1025.8	1027.8	1024	3.8	79.3	3.4	5.7	0	8.8	12
1822	2020-12-26	9.3	13	0.4	12.6	1022.2	1026.1	1019.2	6.9	86.3	4.3	7.9	0	0.5	17
1823	2020-12-27	9.2	13.6	5.7	7.9	1019.1	1021.5	1017	4.5	94.3	3.3	5.3	0	0.4	12
1824	2020-12-28	8	16.3	0.6	15.7	1020.8	1023.4	1018.8	4.6	90.8	3.8	6.4	0	7.9	6
1825	2020-12-29	8.6	16	2.2	13.8	1020.1	1029.1	1016.3	12.8	98.8	8.8	16.7	4.1	0.4	9
1826	2020-12-30	-2.5	2.2	-4.2	6.4	1034.9	1037.2	1029.1	8.1	47	9	16.2	1.7	9.4	9
1827	2020-12-31	-4.1	0.8	-6.9	7.7	1035.3	1037.5	1032.9	4.6	50	5.6	10.7	0	9.4	12
